# Supplementary material
Source: PubMed Central journal article supplement (PMC8252480)
Supplement: ANIE-60-10219-s001.pdf [file ANIE-60-10219-s001.pdf]

## Supporting Information

### **Promoting the Furan Ring-Opening Reaction to Access New Donor–Acceptor Stenhouse Adducts with Hexafluoroisopropanol**

*Michèle Clerc<sup>+</sup>, Friedrich Stricker<sup>+</sup>, Sebastian Ulrich, Miranda Sroda, Nico Bruns,\*  
Luciano F. Boesel,\* and Javier Read de Alaniz\**

anie\_202100115\_sm\_miscellaneous\_information.pdf

## SUPPORTING INFORMATION

**Table of Contents**

|                                                         |    |
|---------------------------------------------------------|----|
| 1. General Experimental .....                           | 3  |
| 1.1 Chemicals .....                                     | 3  |
| 1.2 Instruments and Methods .....                       | 3  |
| 2. Synthesis .....                                      | 4  |
| 2.1 Proposed Mechanism .....                            | 4  |
| 2.2 Furan Adducts .....                                 | 4  |
| 2.3 Amines .....                                        | 6  |
| 2.3 DASAs .....                                         | 7  |
| 2.4 Polymers .....                                      | 11 |
| 3. Kinetics Experiments .....                           | 12 |
| 3.1 UV-Vis Spectroscopy .....                           | 12 |
| 3.1.1 Rates as Function of HFIP Concentration .....     | 12 |
| 3.1.2 Alkyl vs Aryl Amines .....                        | 13 |
| 3.1.3 Polymers .....                                    | 14 |
| 3.2 NMR Spectroscopy .....                              | 14 |
| 3.2.1 Kinetic Fitting .....                             | 15 |
| 4. UV-Vis Absorption Spectra of Furan Adducts .....     | 18 |
| 5. Effects on Thermodynamic Equilibrium .....           | 18 |
| 5.1 NMR Spectroscopy .....                              | 18 |
| 5.2 Solvatochromic Shift Analysis .....                 | 22 |
| 5.3 Effect of HFIP on PTSS .....                        | 23 |
| 6. UV-Vis Absorption Spectra .....                      | 23 |
| 7. DFT Calculations .....                               | 29 |
| 8. Photoswitching Experiments .....                     | 32 |
| 8.1 Overview Switching Parameters .....                 | 33 |
| 8.2 Time Dependent UV-Vis Absorption Spectra .....      | 35 |
| 8.3 Thermodynamic Equilibrium NMR Spectroscopy .....    | 41 |
| 8.4 2D-NMR Spectroscopy .....                           | 47 |
| 9. Fluorescence .....                                   | 49 |
| 10. Probing the H-bonding in the Presence of HFIP ..... | 53 |
| 11. Spectra .....                                       | 54 |
| 11.1 NMR Spectra .....                                  | 54 |
| 11.2 IR Spectra .....                                   | 67 |
| 12. References .....                                    | 67 |

## SUPPORTING INFORMATION

## 1. General Experimental

### 1.1 Chemicals

All commercially obtained reagents were bought from Sigma Aldrich, TCI Europe or Fisher Scientific and were used without purification, except furfural, which was distilled prior to usage. Size exclusion beads (Bio-Beads S-X1 Support, 0.6–14 kDa) were obtained from Bio-Rad Laboratories. Anhydrous solvents were either obtained from Sigma Aldrich or from a solvent purification system.

### 1.2 Instruments and Methods

Room temperature reactions were carried out between 22–25 °C. Thin layer chromatography (TLC) was performed using Merck TLC plates (silica gel 60 F254 on aluminum) and visualized by UV light (254/ 366 nm) or staining with  $\text{KMnO}_4/\text{NaOH}$ . Silica gel chromatography was performed using silica gel from Sigma Aldrich (technical grade, 60 Å pore size, 40–63 µm particle size). Size exclusion chromatography (SEC) was performed on Bio-Beads S-X1 Support beads using distilled THF as mobile phase.  $^1\text{H}$  and  $^{13}\text{C}$  nuclear magnetic resonance (NMR) spectra were measured at 298 K on a Bruker Avance III 400 (400 MHz) NMR spectrometer, a Varian Unity Inova 500 MHz, or a Varian Unity Inova AS600 600 MHz spectrometer.  $^{19}\text{F}$  NMR spectra were recorded on a Bruker Avance III 400 (400 MHz) NMR spectrometer. Chemical shifts ( $\delta$ ) are reported in ppm and referenced internally from the proteo-solvent resonance. Coupling constants (J) are reported in Hz. Abbreviations for the peak multiplicities are *s* (singlet), *d* (doublet), *dd* (doublet of doublet), *t* (triplet), *q* (quadruplet) and *m* (multiplet). For diffusion-edited  $^1\text{H}$  NMR spectra, 40% gradient strengths were applied to selectively suppress the signals of low molecular weight species. Gas chromatography/electron impact ionization-mass spectrometry (GC/EI-MS) was measured on a Thermo Scientific ISQ GC/MS equipped with an ISQ 7000 and Trace 1300 GC using a Thermo Scientific TG-SQC capillary column (15 m, 0.25 mm I.D., 0.25 µm thickness). Split/splitless injector at 280 °C; flowrate at 1 mL min<sup>-1</sup>; gradient set to 20 °C min<sup>-1</sup> from 30 °C to 300 °C, then isothermal for another 4 min. EI set to 70 eV; single stage quadrupole mass analyzer; mass range 35–600 amu at 2 scans min<sup>-1</sup> in full scan mode. The retention time ( $R_t$ ) is reported in min, the mass of molecular ions and characteristic fragments with >15 rel.% are reported as *m/z* (rel.%). High resolution mass spectrometry (HR-MS) was measured on a Waters LCT Premier ESI TOF. Attenuated total reflection Fourier-transform infrared (ATR FT-IR) spectra were recorded on a Varian 640-IR FT-IR spectrometer equipped with an ATR (attenuated total reflection) accessory or a Thermo Nicolet iS10 FTIR Spectrometer with a Smart Diamond ATR; applied as neat samples and absorbance bands reported as  $1/\lambda$  in cm<sup>-1</sup>. Abbreviations for the relative band intensities are *s* (strong), *m* (medium), *w* (weak). Gel permeation chromatography (GPC) was measured on an Agilent 1100 Series high-performance liquid chromatography (HPLC) system on serial coupled PSS SDV 5 m 100 Å and PSS SDV 5 m 1000 Å columns maintained at 30 °C (allows separation from ca. 1–1000 kDa). Signals were recorded on a diode array detector (235 nm/ 360 nm) and a refractive index (RI) detector (at 35 °C). Measurements were performed in THF as an eluent relative to narrow molecular weight PS standards. UV-Vis absorbance spectra were recorded on an Agilent Cary 4000 UV-Visible spectrophotometer or an Agilent 8453 UV-Visible Spectrophotometer G1103A. Details for UV-Vis absorption and photoswitching measurements are presented in the respective *section 8*. Photoluminescence spectra were measured on a Horiba Scientific Fluoromax-Plus fluorescence spectrometer at room temperature (excitation and emission slit widths were set to 2 nm unless otherwise stated).

## SUPPORTING INFORMATION

## 2. Synthesis

## 2.1 Proposed Mechanism

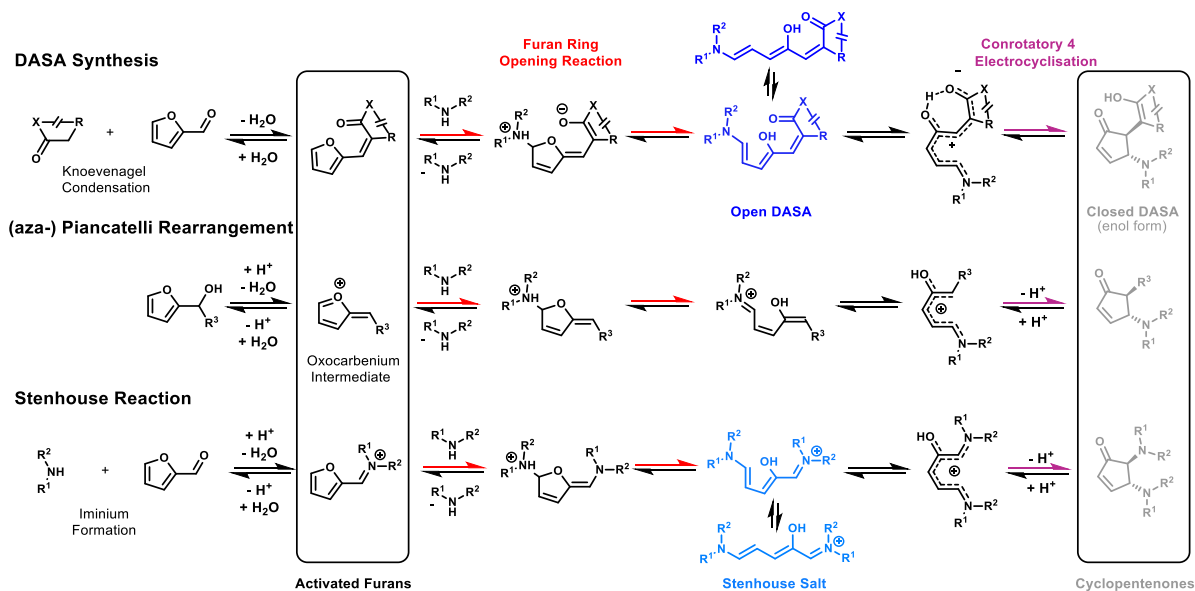

Figure S1: Similarities between the proposed mechanism of DASA synthesis, aza-Piancatelli rearrangement<sup>[1,2]</sup> and Stenhouse reaction.<sup>[3]</sup>

## 2.2 Furan Adducts

Compounds **1** and **S1-S4** were prepared similarly to literature procedures and the spectral analysis matched literature data.<sup>[4,5]</sup>

5-(furan-2-ylmethylene)-2,2-dimethyl-1,3-dioxane-4,6-dione (**S1**).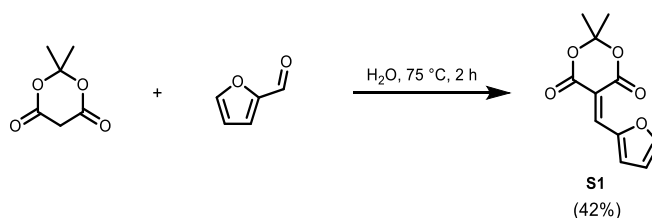

2,2-dimethyl-1,3-dioxane-4,6-dione (11.5 g, 80 mmol, 1.0 eq.) and 2-furaldehyde (7.7 g, 80 mmol, 1.0 eq.) were added to 60 mL H<sub>2</sub>O. This suspension was heated to 75 °C and stirred for 2 h when a brown precipitate formed. The mixture was cooled to room temperature and the precipitate was collected by vacuum filtration and recrystallized from EtOH twice yielding **S1** as a yellow solid (7.5 g, 34 mmol, 42%). <sup>1</sup>H NMR (400 MHz, CDCl<sub>3</sub>) δ/ppm: 8.46 (*d*, *J* = 3.9 Hz, 1H, CHCHCHO), 8.35 (*s*, 1H, OCCCH), 7.84 (*d*, *J* = 1.4 Hz, 1H, CHO), 6.75 (*dd*-like *m*, "*J*" = 3.9, 1.0 Hz, 1H, CHCHO), 1.77 (*s*, 6 H, 2 x CH<sub>3</sub>); <sup>13</sup>C NMR (100 MHz, CDCl<sub>3</sub>) δ/ppm: 163.4 (C=O), 160.3 (C=O), 150.5 (arom. CH), 150.4 (quart. C), 141.4 (arom. CH), 128.2 (arom. CH), 115.4 (arom. CH), 107.7 (quart. C), 104.6 (quart. C), 27.7 (CH<sub>3</sub>); GC/EI-MS (*R*<sub>t</sub> = 12.3 min): 222 (100, *M*<sup>+</sup>), 165 (29), 164 (68), 120 (100, [*M*-CO<sub>2</sub>-O(CH<sub>3</sub>)<sub>2</sub>]<sup>+</sup>), 96 (53), 92 (59), 64 (34), 63 (59), 58 (16), 44 (27), 43 (68).

## SUPPORTING INFORMATION

**5-(furan-2-ylmethylene)-1,3-dimethylpyrimidine-2,4,6(1H,3H,5H)-trione (S2).**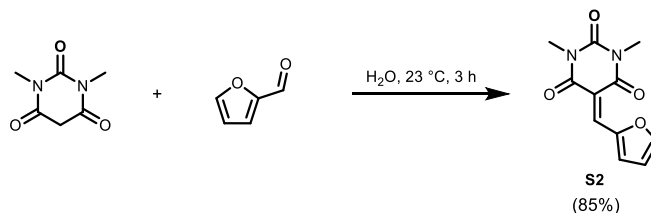

1,3-dimethylpyrimidine-2,4,6(1H,3H,5H)-trione (2.0 g, 13 mmol, 1.0 eq.) and 2-furaldehyde (1.3 g, 14 mmol, 1.1 eq.) were added to 40 mL H<sub>2</sub>O and it was stirred for 3 h at room temperature, when reaction control by TLC showed complete consumption of the starting material. A yellow precipitate formed during the course of the reaction, which was collected by vacuum filtration and washed with ice-cooled H<sub>2</sub>O (2 x 30 mL). The obtained solid was passed through a silica plug with DCM as the solvent. After removal of the solvent *in vacuo* **S2** was obtained as a yellow powder in a yield of 85% (2.6 g, 11 mmol). <sup>1</sup>H NMR (400 MHz, CDCl<sub>3</sub>) δ/ppm: 8.63 (*d*, *J* = 3.8 Hz, 1H, CHCHCHO), 8.43 (*s*, 1H, OCCCH), 7.85 (*d*, *J* = 1.4 Hz, 1H, CHO), 6.74 (*ddd*-like *m*, "*J*" = 3.9, 1.6, 0.7 Hz, 1H, CHCHO), 3.41 (*s*, 3 H, CH<sub>3</sub>), 3.40 (*s*, 3 H, CH<sub>3</sub>); <sup>13</sup>C NMR (100 MHz, CDCl<sub>3</sub>) δ/ppm: 162.6 (C=O), 161.0 (C=O), 151.5 (C=O), 151.3 (quart. C), 150.5 (arom. CH), 141.1 (arom. CH), 128.2 (arom. CH), 115.3 (arom. CH), 111.5 (quart. C), 29.1 (CH<sub>3</sub>), 28.4 (CH<sub>3</sub>); GC/EI-MS (*R*<sub>t</sub> = 13.9 min): 234 (100, *M*<sup>+</sup>), 206 (36), 149 (29), 133 (35), 120 (63), 106 (16), 93 (22), 92 (56), 66 (81), 64 (26), 63 (43).

**2-phenyl-5-(trifluoromethyl)-2,4-dihydro-3H-pyrazol-3-one (S3).**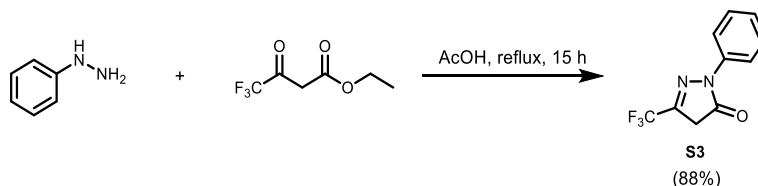

Phenylhydrazine (2.4 mL, 24 mmol, 1.0 eq.) and ethyl 4,4,4-trifluoroacetoacetate (3.5 mL, 24 mmol, 1.0 eq.) were dissolved in 6 mL AcOH and heated to reflux under N<sub>2</sub> for 15 h while stirring. The reaction mixture was then allowed to cool to room temperature whereupon beige crystals formed. The crystals were filtered off with a Buchner funnel, washed with H<sub>2</sub>O (10 mL) and dried in a desiccator overnight (yield 4.8 g, 21 mmol, 88%). NMR characterization is of enol form of product. <sup>1</sup>H NMR (400 MHz, DMSO-*d*<sub>6</sub>) δ/ppm: 12.43 (*br s*, 1H, OH), 7.71 (*d*-like *m*, "*J*" = 7.6 Hz, 2H, arom. H), 7.51 (*t*-like *m*, "*J*" = 7.4 Hz, 2H, arom. H), 7.38 (*tt*-like *m*, "*J*" = 7.4, 1.5 Hz, 1H, NCCHCHCH), 5.94 (*s*, 1H, CF<sub>3</sub>CCH); <sup>13</sup>C NMR (100 MHz, DMSO-*d*<sub>6</sub>) δ/ppm: 153.7 (COH), 140.4 (*q*, <sup>2</sup>*J*<sub>CF</sub> = 37 Hz, CCF<sub>3</sub>), 137.7 (quart. arom. C), 129.1 (arom. CH), 127.2 (NCCHCHCH), 122.3 (arom. CH), 121.4 (*q*, *J*<sub>CF</sub> = 269 Hz, CF<sub>3</sub>), 85.6 (*m*, <sup>3</sup>*J*<sub>CF</sub> = 2 Hz, CHCCF<sub>3</sub>); GC/EI-MS (*R*<sub>t</sub> = 11.4 min): 228 (100, *M*<sup>+</sup>), 105(23), 77(59).

**4-(furan-2-ylmethylene)-3-(trifluoromethyl)isoxazol-5(4H)-one (S4).**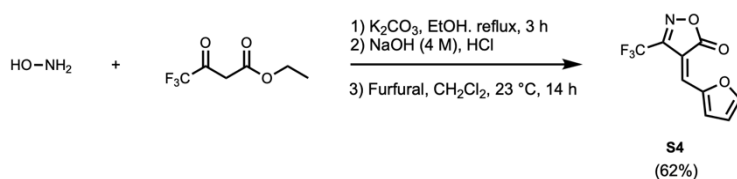

Hydroxylamine hydrochloride (1.9 g, 27 mmol, 2.3 eq.), 4,4,4-trifluoroacetoacetate (2.4 g, 12 mmol, 1.0 eq.) and K<sub>2</sub>CO<sub>3</sub> (3.8 g, 27 mmol, 2.3 eq.) were heated to reflux in EtOH (15 mL) for 3.5 hours while stirring. The reaction mixture was allowed to cool to room temperature, and the solvent was removed under reduced pressure. The yellowish residue was re-dissolved in 10 mL of an aqueous solution of NaOH (4 M) and stirred at 23 °C for 10 min. This solution was then acidified with conc. HCl to a pH value of 2 and extracted with DCM (3 x 50 mL). The organic phase was dried with MgSO<sub>4</sub>, filtered and the solvent was removed *in vacuo* to afford a yellow oil (1.8 g). This oil was re-dissolved in DCM (20 mL), 2-furaldehyde (1.4 g, 15 mmol) was added, and it was stirred at 23 °C for 14 h until the mixture turned brown. H<sub>2</sub>O (10 mL) was added and DCM was removed *in vacuo*. The precipitated brown solid was collected by filtration, rinsed with H<sub>2</sub>O and dried in a desiccator. Purification was done by passing the product through a silica plug with DCM as an eluent. After removal of the solvent *in vacuo*, the product **S4** was obtained as a yellow solid (1.7 g, 7.4 mmol, 62%). <sup>1</sup>H NMR (400 MHz, CDCl<sub>3</sub>) δ/ppm: 8.75 (*d*, *J* = 3.8 Hz, 1H, CHCHCHO), 7.94 (*d*, *J* = 1.4 Hz, CHO), 7.72 (*s*, 1H, CF<sub>3</sub>CCCH), 6.86 (*ddd*, *J* = 3.9, 1.6, 0.7 Hz, 1H, CHCHO); <sup>13</sup>C NMR (100 MHz, CDCl<sub>3</sub>) δ/ppm: 167.1 (C=O), 153.9 (*q*, <sup>2</sup>*J*<sub>CF</sub> = 38 Hz, CCF<sub>3</sub>), 152.1 (arom. CH), 150.5 (quart. C), 134.5 (*m*, <sup>4</sup>*J*<sub>CF</sub> = 1 Hz, CHCCCF<sub>3</sub>), 129.7 (arom. CH), 118.8 (*q*, *J*<sub>CF</sub> = 273 Hz, CF<sub>3</sub>), 116.5 (arom. CH), 106.9 (quart. C); GC/EI-MS (*R*<sub>t</sub> = 9.8 min): 231 (87, *M*<sup>+</sup>), 173(100), 162(29), 145(33), 125(28), 106(16), 95(28), 75(19), 63(23).

## SUPPORTING INFORMATION

## 4-(furan-2-ylmethylene)-2-phenyl-5-(trifluoromethyl)-2,4-dihydro-3H-pyrazol-3-one (1).

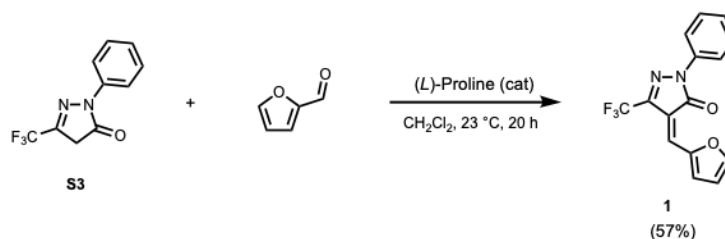

**S3** (2.5 g, 11 mmol, 1 eq.) and 2-furaldehyde (1.9 g, 20 mmol, 1.8 eq.) were combined in 30 mL DCM and (*L*)-proline (0.21 g, 1.9 mmol, 0.1 eq.) was added. The mixture was stirred at 23 °C for 20 h and passed through a silica plug with DCM as an eluent. To the orange filtrate was added H<sub>2</sub>O (20 mL) and this mixture was subjected to reduced pressure to remove the DCM. The precipitated product was then filtered off and rinsed with water to afford **1** as a dark orange solid (1.9 g, 6.3 mmol, 57%). <sup>1</sup>H NMR (400 MHz, CDCl<sub>3</sub>) δ/ppm: 8.92 (*d*, *J* = 3.9 Hz, 1H, CHCHCHO), 7.92 (*d*, *J* = 7.9 Hz, 2H, NCCH), 7.87 (*d*, *J* = 1.3 Hz, 1H, CHO), 7.69 (*s*, 1H, CF<sub>3</sub>CCCH), 7.46 (*t*, *J* = 8.0 Hz, 2H, NCCHCH), 7.29 – 7.26 (*m*, 1H, NCCHCHCH), 6.80 (*dd*-like *m*, "J" = 3.9, 1.3 Hz, 1H, CHCHO); <sup>13</sup>C NMR (100 MHz, CDCl<sub>3</sub>) δ/ppm: 161.5 (C=O), 150.9 (CC=O), 150.8 (CHO), 140.0 (*q*, <sup>2</sup>J<sub>CF</sub> = 37 Hz, CCF<sub>3</sub>), 137.8 (CCHCHCHO), 131.7 (*m*, <sup>4</sup>J<sub>CF</sub> = 1 Hz, CHCCCF<sub>3</sub>), 129.1 (arom. CH), 128.1 (arom. CH), 126.3 (arom. CH), 120.1 (*q*, J<sub>CF</sub> = 272 Hz, CF<sub>3</sub>), 120.0 (arom. CH), 115.9 (NCCH), 115.8 (arom. CH). GC/EI-MS (R<sub>t</sub> = 14.0 min): 306 (75, M<sup>+</sup>), 77(100), 51(21).

## 2.3 Amines

Compound **S5** and **S7** were prepared according to literature procedure<sup>[6,7]</sup> and spectral analysis matched literature data.<sup>[6,7]</sup>

**N**-(4-Methoxyphenyl)propane-1,3-diamine (**S5**).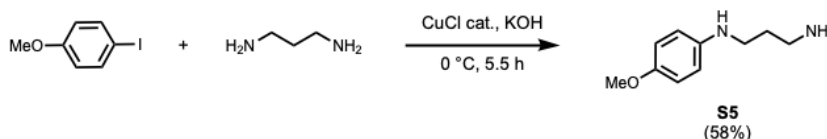

4-Iodoanisole (3.9 g, 17 mmol, 1.0 eq.), CuCl (freshly recrystallized from MeOH and dry, 0.17 g, 1.7 mmol, 0.1 eq.) and a fine and well dried powder of KOH (1.6 g, 28 mmol, 1.6 eq.) were added to a dry 100 mL round-bottom flask equipped with a stirrer and a septum under N<sub>2</sub>. The flask was immersed into an ice-water bath and 1,3-diaminopropane (6.3 mL, 5.6 g, 76 mmol, 4.5 eq.) was added slowly at 0 °C. The reaction mixture turned dark blue overtime. After stirring at 0 °C for 5.5 h, the mixture was exposed to air and 30 mL of H<sub>2</sub>O were added. It was extracted with DCM (3 x 150 mL) and the organic phase was dried over MgSO<sub>4</sub>, filtered and solvent was removed *in vacuo* to yield the crude product as a brown oil (2.5 g). The product was purified via column chromatography on silica gel (DCM/methanol/ammonia 20:10:1) to afford **S5** as brownish oil (1.8 g, 9.9 mmol, 58%). <sup>1</sup>H NMR (400 MHz, *d*-MeOD) δ/ppm: δ 6.75 (*d*-like *m*, "J" = 9.1 Hz, 2H, arom. H), 6.65 (*d*-like *m*, "J" = 8.9 Hz, 2H, arom. H), 3.70 (*s*, 3 H, OCH<sub>3</sub>), 3.09 (*t*, *J* = 7.0 Hz, 2H, CH<sub>2</sub>), 2.75 (*t*, *J* = 7.2 Hz, 2H, CH<sub>2</sub>), 1.75 (*q*, *J* = 7.0 Hz, 2H, CH<sub>2</sub>CH<sub>2</sub>CH<sub>2</sub>); GC/EI-MS (R<sub>t</sub> = 12.3 min): 180 (72, M<sup>+</sup>), 148(17), 136(100), 123(30), 108(22).

**4**-(3-Aminopropoxy)-diphenylamine (**S6**).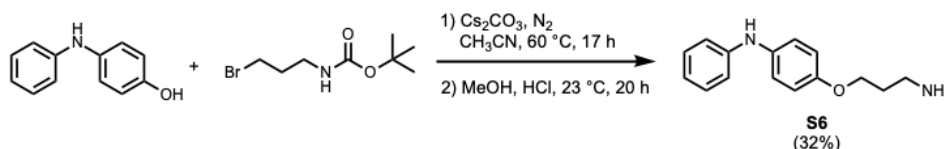

3-Bormpropylamine hydrobromide was *N*-*boc* protected as described in literature.<sup>[8]</sup> 4-Hydroxydiphenylamine (2.50 g, 13.5 mmol, 1.0 eq.), Cs<sub>2</sub>CO<sub>3</sub> (14.6 g, 44.7 mmol, 3.3 eq.) and 3-(*N*-*Boc*)aminopropyl bromide (3.50 g, 14.7 mmol, 1.1 eq.) were added to a two-neck 250 mL round bottom flask equipped with a magnetic stir bar, a septum and a reflux condenser under N<sub>2</sub>. CH<sub>3</sub>CN (anhydrous, 75 mL) was added and the obtained suspension was heated to 60 °C under N<sub>2</sub> and stirred for 17 h. The mixture was then allowed to cool to room temperature and the solvent was removed *in vacuo*. The residue was taken up in AcOEt (150 mL) and extracted with H<sub>2</sub>O (2 x 50 mL) and brine (50 mL). The organic layer was dried over MgSO<sub>4</sub>, filtered and the solvent removed *in vacuo* to yield a brown solid, which was re-dissolved in MeOH (15 mL) acidified with conc. HCl (2 mL). This solution was stirred at 23 °C under N<sub>2</sub> for 20 h when

## SUPPORTING INFORMATION

reaction control by TLC (AcOEt/heptane 1:2) showed complete deprotection. The solution was then cooled to 0 °C in an ice-water bath and basified with an aqueous solution of NaOH (4 M) to a pH value of 9. H<sub>2</sub>O (15 mL) was added and a beige precipitate formed, which was collected by filtration. The product was purified via column chromatography on silica gel (DCM/methanol/ammonia 20:10:1) to afford **S6** as brownish solid (1.05 g, 4.30 mmol, 32%). <sup>1</sup>H NMR (400 MHz, CDCl<sub>3</sub>) δ/ppm: 7.21 (*t*-like *m*, "J" = 7.9 Hz, 2H, arom. H), 7.05 (*d*-like *m*, "J" = 8.9 Hz, 2H, arom. H), 6.91 – 6.81 (*m*, 5 H, arom. H), 5.49 (*br s*, 1H, NH), 4.03 (*t*, J = 6.1 Hz, 2H, CH<sub>2</sub>), 2.92 (*t*, J = 6.8 Hz, 2H, CH<sub>2</sub>), 1.92 (*q*, J = 6.4 Hz, 2H, CH<sub>2</sub>CH<sub>2</sub>CH<sub>2</sub>), 1.31 (*br s*, 2H, NH<sub>2</sub>). <sup>13</sup>C NMR (100 MHz, CDCl<sub>3</sub>) δ/ppm: 154.8 (quart. C), 145.3 (quart. C), 135.9 (quart. C), 129.4 (2xCH), 122.3 (2xCH), 119.7 (CH), 115.8 (2xCH), 115.5 (2xCH), 66.4 (CH<sub>2</sub>), 39.5 (CH<sub>2</sub>), 33.3 (CH<sub>2</sub>); IR (ATR, cm<sup>-1</sup>): 3409w, 3369w, 3249w, 3183w, 3098w, 3029w, 2998w, 2931w, 2872w, 2858w, 1596m, 1505s, 1493s, 1471s, 1445m, 1397w, 1321m, 1596m, 1225s, 1174m, 1114m, 1074w, 1025m, 993w, 941w, 877m, 818s, 792m, 741s, 693s; HR-MS (ESI+) *m/z* 243.1498, calc. 243.1497 for [M + H]<sup>+</sup>; GC/EI-MS (R<sub>t</sub> = 15.2 min): 242 (37, M<sup>+</sup>), 186(23), 185(100, [M-C<sub>3</sub>H<sub>8</sub>N+H]<sup>+</sup>), 184(46).

**Methyl indoline-2-carboxylate (S7).**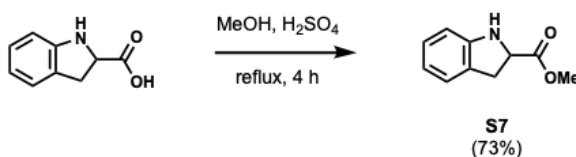

Indoline-2-carboxylic acid (2 g, 12 mmol, 1 eq.) was dissolved in methanol (25 mL). Concentrated sulfuric acid (5 mL) was added and the solution was heated to reflux for 4 h. After letting the solution cool to room temperature, it was neutralized with sodium bicarbonate and subsequently extracted with AcOEt (2 x 5 mL). After drying with MgSO<sub>4</sub>, the solvent was evaporated under reduced pressure which yielded the product **S7** as a colorless oil (1.56 g, 9 mmol, 73%). The spectral analysis matched literature.<sup>[7]</sup>

**2.3 DASAs****DASA-1**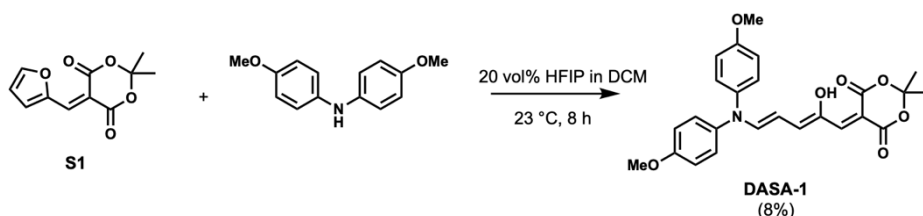

**S1** (500 mg, 2.3 mmol, 1.00 eq.) and 4,4'-dimethoxydiphenylamine (500 mg, 2.2 mmol, 0.95 eq.) were dissolved in DCM (0.8 mL). HFIP (0.2 mL) were added and the solution stirred for 8 h. The solvent was removed under reduced pressure and redissolved in 1:1 AcOEt/hexanes (1 mL) and then filtered through a silica plug with first 1:9 AcOEt/hexanes and then 1:1 AcOEt/hexanes as an eluent. The second eluent was collected and the solvent removed under reduced pressure to yield the product as a dark blue solid (80 mg, 0.18 mmol, 8%). <sup>1</sup>H NMR (500 MHz, CDCl<sub>3</sub>) closed isomer: δ/ppm: 7.79 (*dd*, J = 6.0, 1.9 Hz, 1H), 6.91 – 6.85 (*m*, 4H), 6.85 – 6.79 (*m*, 4H), 6.30 (*dd*, J = 6.0, 1.9 Hz, 1H), 5.65 – 5.57 (*m*, 1H), 4.06 – 4.02 (*m*, 1H) 3.77 (*s*, 6H), 3.57 – 3.52 (*m*, 1H), 1.81 (*d*, J = 8.0 Hz, 6H); <sup>13</sup>C NMR (125 MHz, CDCl<sub>3</sub>) δ/ppm: 202.2, 164.8, 164.4, 162.3, 155.7, 144.1, 139.6, 133.8, 123.9, 119.6, 115.3, 114.7, 105.7, 104.0, 62.6, 55.7, 55.6, 55.6, 49.9, 44.1, 28.2, 27.6, 27.6, 27.1, 26.9; HR-MS (ESI+) *m/z* 474.1522, calc. 474.1525 for [M + Na]<sup>+</sup>; IR (ATR, cm<sup>-1</sup>): 2923, 1697, 1610, 1592, 1454, 1389, 1376, 1336, 1302, 1243, 1193, 1108, 1020, 926, 908, 826, 767, 728, 714, 680, 623, 601, 545.

**DASA-2**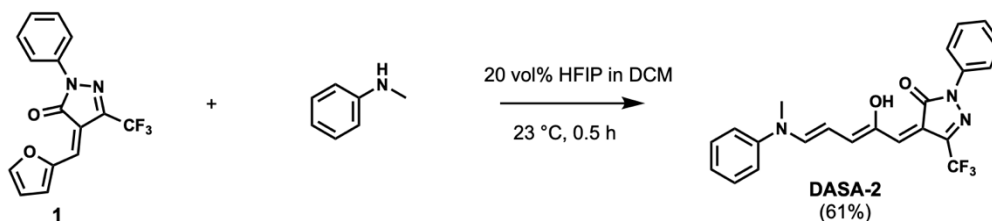

**1** (100 mg, 0.32 mmol, 1.0 eq.) and *N*-methylaniline (42 mg, 0.40 mmol, 1.2 eq.) were dissolved in DCM (0.8 mL). HFIP (0.2 mL) were added and the solution stirred for 0.5 h. The solvent was removed under reduced pressure and the remaining solid triturated in diethyl ether (1.0 ml). After filtration the product was isolated as a dark blue solid (performed in triplicates: 80/81/87 mg, 0.19/0.19/0.20 mmol, 59/60/64%). <sup>1</sup>H NMR (400 MHz, CDCl<sub>3</sub>) δ/ppm: 12.97 (*s*, 1H), 7.93 – 7.88 (*m*, 2H), 7.57 – 7.51 (*m*, 1H), 7.49 – 7.39 (*m*, 5H), 7.31 (*t*, J

## SUPPORTING INFORMATION

= 7.5 Hz, 1H), 7.25 – 7.18 (*m*, 2H), 6.69 (*d*, *J* = 12.1 Hz, 1H), 6.63 (*s*, 1H), 6.34 (*t*, *J* = 12.4 Hz, 1H), 3.57 (*s*, 3H); <sup>13</sup>C NMR (125 MHz, CDCl<sub>3</sub>) δ/ppm: 164.3, 163.6, 150.7, 146.9, 138.3, 134.9, 134.4, 130.0, 129.3, 129.0, 128.8, 127.8, 127.0, 125.8, 123.1, 120.5, 119.1, 114.8, 105.9, 68.1, 45.5, 33.1; HR-MS (ESI+) *m/z* 436.1248, calc. 436.1249 for [M + Na]<sup>+</sup>; IR (ATR, cm<sup>-1</sup>): 2446, 1604, 1549, 1517, 1497, 1462 1356, 1309, 1269, 1243, 1228, 1203, 1176, 1159, 1148, 1080, 960, 826, 787, 775, 755, 687.

## DASA-3

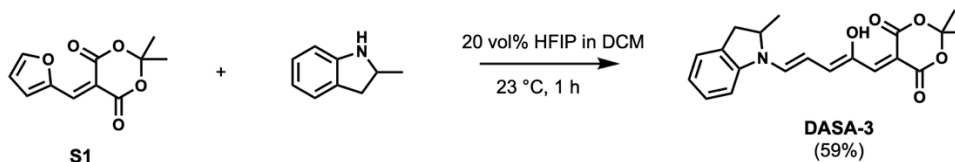

**S1** (142 mg, 0.64 mmol, 1.0 eq.) and 2-methylindoline (102 mg, 0.77 mmol, 1.2 eq.) were dissolved in DCM (0.8 mL). HFIP (0.2 mL) were added and the solution stirred for 1 h. The solvent was removed under reduced pressure and the remaining solid triturated in diethyl ether (1.0 mL). After filtration the product was isolated as a dark blue solid (135 mg, 0.38 mmol, 59%). The spectroscopic data matched literature.<sup>[5]</sup>

## DASA-4

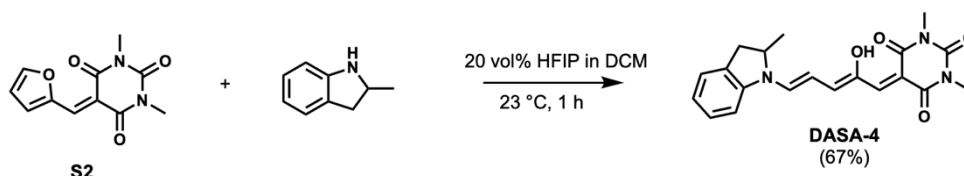

**S2** (150 mg, 0.64 mmol, 1.0 eq.) and 2-methylindoline (102 mg, 0.77 mmol, 1.2 eq.) were dissolved in DCM (0.8 mL). HFIP (0.2 mL) were added and the solution stirred for 1 h. The solvent was removed under reduced pressure and the remaining solid triturated in diethyl ether (1.0 mL). After filtration the product was isolated as a dark blue solid (158 mg, 0.43 mmol, 67%). The spectroscopic data matched literature.<sup>[5]</sup>

## DASA-5

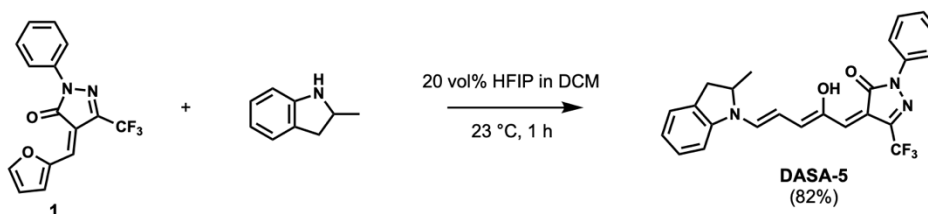

**1** (100 mg, 0.32 mmol, 1.0 eq.) and 2-methylindoline (42 mg, 0.32 mmol, 1.0 eq.) were dissolved in DCM (0.8 mL). HFIP (0.2 mL) were added and the solution stirred for 1 h. The solvent was removed under reduced pressure and the remaining solid triturated in diethyl ether (1.0 mL). After filtration the product was isolated as a dark blue solid (115 mg, 0.26 mmol, 82%). The spectroscopic data matched literature.<sup>[5]</sup>

## DASA-6

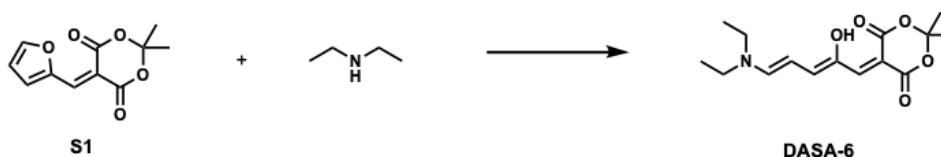

This compound was prepared analogously to literature procedures. Spectroscopic data matched literature.<sup>[4,9]</sup>



## SUPPORTING INFORMATION

## DASA-7

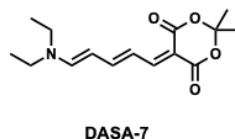

This compound was prepared analogously to literature procedures. Spectroscopic data matched literature.<sup>[10]</sup>

## DASA-8

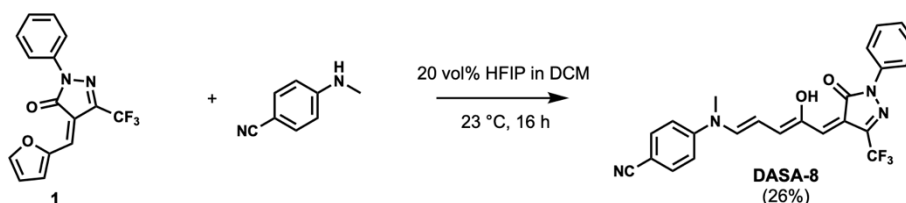

**1** (231 mg, 0.75 mmol, 1.0 eq.) and 4-methylaminobenzonitrile (100 mg, 0.75 mmol, 1.0 eq.) were dissolved in DCM (0.8 mL). HFIP (0.2 mL) were added and the solution stirred for 16 h. The solvent was removed under reduced pressure and the remaining solid triturated in diethyl ether (1.0 mL). After filtration the product was isolated as a dark blue solid (84 mg, 0.19 mmol, 26%). <sup>1</sup>H NMR (500 MHz, CDCl<sub>3</sub>), closed isomer: δ/ppm: 7.72 – 7.64 (*m*, 1H), 7.60 – 7.52 (*m*, 2H), 7.52 – 7.42 (*m*, 3H), 6.72 – 6.66 (*m*, 2H), 6.58 – 6.49 (*m*, 1H), 5.35 – 5.28 (*m*, 1H), 3.81 – 3.77 (*m*, 1H), 2.91 (*s*, 3H); <sup>13</sup>C NMR (125 MHz, CDCl<sub>3</sub>) δ/ppm: 206.01, 163.2, 152.2, 139.6, 138.8, 137.5, 135.4, 134.0, 129.6, 128.5, 123.5, 123.3, 120.2, 113.1, 100.1, 66.3, 46.7, 32.9; HR-MS (ESI+) *m/z* 461.1194, calc. 461.1201 for [M + Na]<sup>+</sup>; IR (ATR, cm<sup>-1</sup>): 2223, 1725, 1597, 1518, 1479, 1381, 1347, 1324, 1182, 1141, 1113, 817, 753, 720, 691, 683.

## DASA-9

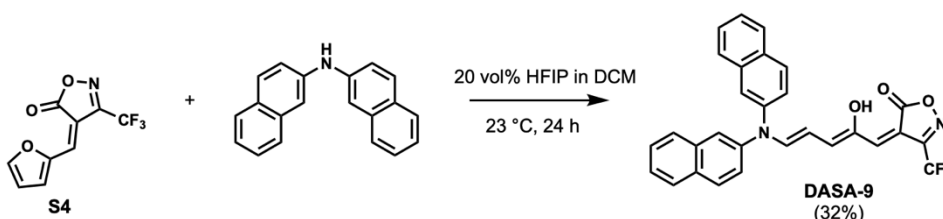

**S4** (171 mg, 0.74 mmol, 1.0 eq.) and 2,2'-dinaphtylamine (200 mg, 0.74 mmol, 1.0 eq.) were dissolved in DCM (0.8 mL). HFIP (0.2 mL) were added and the solution stirred for 24 h. The solvent was removed under reduced pressure and the remaining solid triturated in diethyl ether (1.0 mL). After filtration the product was isolated as a dark blue solid (120 mg, 0.24 mmol, 32%). <sup>1</sup>H NMR (500 MHz, CDCl<sub>3</sub>) δ/ppm: 11.08 – 11.04 (*m*, 1H), 7.96 – 7.90 (*m*, 2H), 7.86 – 7.80 (*m*, 2H), 7.77 – 7.74 (*m*, 2H), 7.73 – 7.67 (*m*, 2H), 7.67 – 7.56 (*m*, 1H), 7.53 – 7.50 (*m*, 3H), 7.49 – 7.44 (*m*, 1H), 7.38 – 7.32 (*m*, 1H), 7.29 – 7.22 (*m*, 1H), 6.77 (*d*, *J* = 12.6 Hz, 1H), 6.44 (*s*, 1H), 6.30 (*t*, *J* = 12.4 Hz, 1H); <sup>13</sup>C NMR (125 MHz, CDCl<sub>3</sub>) δ/ppm: 175.0, 152.8, 151.7, 150.5, 148.4, 139.2, 134.6, 134.0, 129.3, 128.0, 127.7, 126.6, 126.5, 123.7, 120.3, 116.3, 112.3, 109.5, 96.4; HR-MS (ESI+) *m/z* 523.1233, calc. 523.1240 for [M + Na]<sup>+</sup>; IR (ATR, cm<sup>-1</sup>): 1660, 1597, 1483, 1457, 1375, 1336, 1291, 1210, 1183, 1133, 982, 942, 769, 739.

## DASA-10

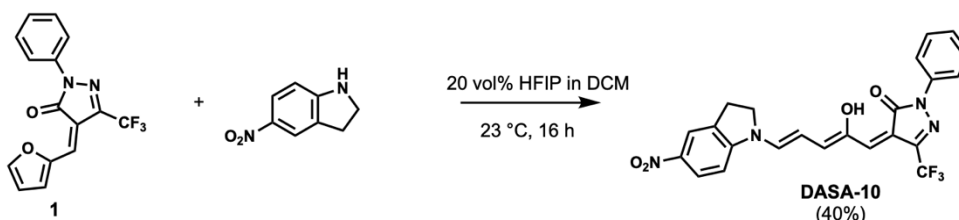

**1** (100 mg, 0.32 mmol, 1.0 eq.) and 5-nitroindoline (52 mg, 0.75 mmol, 1.0 eq.) were dissolved in DCM (0.8 mL). HFIP (0.2 mL) were added and the solution stirred for 16 h. The solvent was removed under reduced pressure and the remaining solid triturated in diethyl ether (1.0 mL). After filtration the product was isolated as a dark blue solid (60 mg, 0.13 mmol, 40%). <sup>1</sup>H NMR (600 MHz, CDCl<sub>3</sub>), closed isomer: δ/ppm: 7.99 – 7.92 (*m*, 2H), 7.75 – 7.70 (*m*, 1H), 7.64 – 7.61 (*m*, 2H), 7.51 – 7.38 (*m*, 3H), 6.59 – 6.55 (*m*, 1H), 6.30 – 6.24 (*m*, 1H), 5.12 – 5.07 (*m*, 1H), 3.98 – 3.95 (*m*, 1H), 3.81 – 3.74 (*m*, 1H), 3.65 – 3.55 (*m*, 1H), 3.18 – 3.11 (*m*, 2H), 2.08 – 1.94 (*m*, 1H); <sup>13</sup>C NMR (125 MHz, CDCl<sub>3</sub>) δ/ppm: 162.1, 139.8, 135.6, 129.6, 129.2, 128.7, 126.3, 123.3, 120.9, 105.2, 63.6, 48.9, 44.9, 27.2; HR-MS

## SUPPORTING INFORMATION

(ESI+)  $m/z$  493.1096, calc. 493.1100 for  $[M + Na]^+$ ; IR (ATR,  $cm^{-1}$ ): 1615, 1599, 1562, 1536, 1493, 1470, 1453, 1364, 1320, 1248, 1214, 1196, 1152, 1107, 978, 944, 914, 899, 878, 781, 755, 742, 709, 685, 660, 582, 559.

## DASA-11

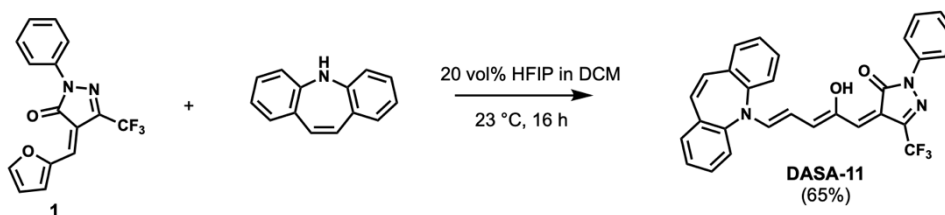

**1** (200 mg, 0.65 mmol, 1.2 eq.) and 5H-dibenz[b,f]azepine (101 mg, 0.52 mmol, 1.0 eq.) were dissolved in DCM (0.8 mL). HFIP (0.2 mL) were added and the solution stirred for 16 h. The solvent was removed under reduced pressure and the remaining solid triturated in diethyl ether (1.0 mL). After filtration the product was isolated as a dark blue solid (170 mg, 0.34 mmol, 65%).  $^1H$  NMR (400 MHz,  $CDCl_3$ )  $\delta$ /ppm: 12.81 – 12.77 (*m*, 1H), 7.96 – 7.85 (*m*, 2H), 7.59 – 7.48 (*m*, 3H), 7.50 – 7.34 (*m*, 8H), 7.25 – 7.16 (*m*, 1H), 6.96 – 6.90 (*m*, 2H), 6.63 – 6.55 (*m*, 2H), 6.18 (*t*,  $J = 12.5$  Hz, 1H);  $^{13}C$  NMR (125 MHz,  $CDCl_3$ )  $\delta$ /ppm: 164.3, 155.7, 150.6, 146.8, 140.2, 139.9, 138.3, 135.5, 133.3, 132.1, 130.3, 129.7, 129.5, 128.8, 125.8, 123.0, 120.5, 119.9, 119.3, 115.6, 105.1; HR-MS (ESI+)  $m/z$  554.1666, calc. 554.1667 for  $[M + Na + MeOH]^+$ ; IR (ATR,  $cm^{-1}$ ): 1607, 1554, 1497, 1453, 1430, 1347, 1302, 1202, 1182, 1148, 1108, 1001, 984, 962, 944, 875, 757, 741, 684, 653, 640, 600, 555.

## DASA-12

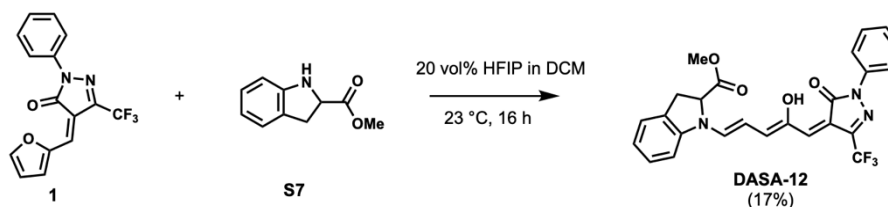

**1** (200 mg, 0.65 mmol, 1.1 eq.) and **S7** (104 mg, 0.58 mmol, 1.0 eq.) were dissolved in DCM (0.8 mL). HFIP (0.2 mL) were added and the solution stirred for 16 h. The solvent was removed under reduced pressure and the remaining solid triturated in diethyl ether (1.0 mL). After filtration the product was isolated as a dark blue solid (48 mg, 0.10 mmol, 17%).  $^1H$  NMR (500 MHz,  $CDCl_3$ )  $\delta$ /ppm: 7.75 (*d*,  $J = 7.9$  Hz, 2H), 7.54 (*d*,  $J = 6.1$  Hz, 1H), 7.46 (*t*,  $J = 7.8$  Hz, 3H), 7.36 (*q*,  $J = 7.8$  Hz, 1H), 7.17 – 7.06 (*m*, 2H), 6.80 (*t*,  $J = 7.4$  Hz, 1H), 6.54 (*d*,  $J = 6.1$  Hz, 1H), 6.46 (*d*,  $J = 8.0$  Hz, 1H), 4.95 – 4.90 (*m*, 1H), 4.37 (*dd*,  $J = 11.5, 5.6$  Hz, 1H), 3.89 – 3.81 (*m*, 4H), 3.75 – 3.60 (*m*, 3H), 3.23 (*dd*,  $J = 16.5, 5.6$  Hz, 1H);  $^{13}C$  NMR (125 MHz,  $CDCl_3$ )  $\delta$ /ppm: 202.4, 158.9, 152.1, 149.7, 137.7, 136.4, 129.0, 128.4, 127.5, 126.5, 124.6, 123.0, 120.3, 109.0, 95.4, 68.0, 60.8, 53.8, 46.5, 34.6; HR-MS (ESI+)  $m/z$  506.1297, calc. 506.1304 for  $[M + Na]^+$ ; IR (ATR,  $cm^{-1}$ ): 1739, 1610, 1557, 1489, 1461, 1431, 1350, 1315, 1243, 1210, 1162, 1147, 1116, 1042, 984, 961, 945, 869, 835, 788, 763, 743, 710, 692, 665, 647.

## DASA-13

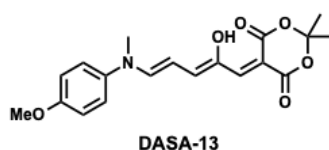

This compound was prepared analogously to literature procedures. Spectroscopic data matched literature.<sup>[11]</sup>

## DASA-14

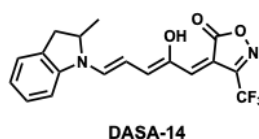

This compound was prepared analogously to literature procedures. Spectroscopic data matched literature.<sup>[5]</sup>

## SUPPORTING INFORMATION

## 2.4 Polymers

Compounds **S8-S10** were prepared similarly to literature procedures.<sup>[12]</sup>

P(BMA-PFPMA) (**S8**)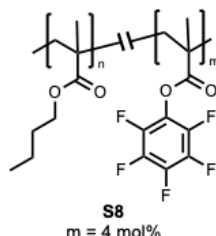

The monomers were purified from their polymerization inhibitors by passing them through a basic aluminum oxide plug. Butyl methacrylate (4.95 g, 34.8 mmol, 1.00 eq.), pentafluorophenyl methacrylate (0.370 g, 1.45 mmol, 0.04 eq.) and azobis(isobutyronitrile) (AIBN, recrystallized from MeOH, 70 mg, 0.43 mmol, 0.01 eq.) were dissolved in 10 mL of dry 1,4-dioxane in a round bottom flask equipped with a rubber septum and a magnetic stir bar. The mixture was deoxygenated by bubbling N<sub>2</sub> gas through for 30 minutes. The flask was then immersed into a pre-heated oil bath and the reaction mixture was stirred at 80 °C under nitrogen for 22 h. The solution was allowed to cool to room temperature and diluted with 10 mL of THF. The polymer was precipitated into ice-cold MeOH (175 mL) under rapid stirring, filtered off, washed with MeOH and dried under vacuum to yield **S8** as colorless solid (yield: 4.36 g). <sup>1</sup>H NMR (400 MHz, CDCl<sub>3</sub>) δ/ppm: 3.94 (*d*-like *m*, OCH<sub>2</sub>), 2.00 – 1.81 (*m*, CH<sub>2</sub>), 1.61 (*br s*, CH<sub>2</sub>), 1.40 (*d*-like *m*, CH<sub>2</sub>), 1.28 – 1.14 (*br*, CH<sub>3</sub>), 1.02 (*br s*, CH<sub>3</sub>), 0.95 (*br s*, CH<sub>3</sub>), 0.87 (*br s*, CH<sub>3</sub>); <sup>19</sup>F NMR (377 MHz, CDCl<sub>3</sub>) δ/ppm: -149.5 (*s*, 1F), -151.4 (*s*, 1F), -(157.7 – 157.9) (*m*, 1F), -(162.1 – 162.3) (*m*, 2F); IR (ATR, cm<sup>-1</sup>): 2957*m*, 2932*m*, 2873*w*, 1777*w* (C=O, PFP ester), 1722*s* (C=O, butyl ester), 1519*m* (aryl C-F), 1466*m*, 1450*m*, 1382*w*, 1264*m*, 1239*m*, 1171*m*, 1142*s*, 1063*m*, 993*m*, 964*m*, 945*m*, 843*w*, 748*m*; GPC: M<sub>n</sub> = 30.3 kDa, PDI = 2.7.

P(BMA-S6MA) (**S9**)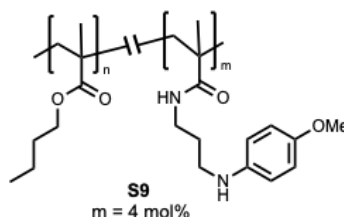

**S8** (1.0 g) was dissolved in 10 mL of anhydrous DMF in a Schlenk tube equipped with rubber septum and magnetic stir bar. **S5** (0.23 g, 1.3 mmol) and TEA (0.20 mL, 0.15 g, 1.5 mmol) were dissolved in 2 mL of anhydrous DMF and added to the polymer solution. The reaction mixture was stirred at 50 °C under nitrogen atmosphere for 5 days until completion. The reaction progress was monitored via IR spectroscopy (disappearance of PFP ester band at 1777 cm<sup>-1</sup>) of samples precipitated from the reaction mixture by addition to ice-cooled MeOH. After completion of the reaction, the polymer was precipitated into ice-cold methanol/water (5:1, 100 mL) with a few drops of concentrated ammonia and centrifuged. The polymer pellet was dissolved in THF and re-precipitated twice and then dried under vacuum to afford **S9** as white solid (0.98 g). Full conversion of the PFP active ester was confirmed via <sup>19</sup>F NMR from the complete disappearance of the fluorine signals. <sup>1</sup>H NMR (400 MHz, CDCl<sub>3</sub>) δ/ppm: 6.78 (*d*, J = 8.3 Hz, 2 arom. H), 6.63 (*d*, J = 8.1 Hz, 2 arom. H), 6.35 – 6.25 (*br*, N-H, amide), 3.94 (*m*, OCH<sub>2</sub>), 3.74 (*m*, OCH<sub>3</sub>), 3.30 (*br s*, OCNHCH<sub>2</sub>), 3.16 (*br s*, CHCNHCH<sub>2</sub>), 2.00 – 1.81 (*m*, CH<sub>2</sub>), 1.59 (*br s*, CH<sub>2</sub>), 1.40 (*d*-like *m*, CH<sub>2</sub>), 1.28 – 1.21 (*br*, CH<sub>3</sub>), 1.02 (*br s*, CH<sub>3</sub>), 0.94 (*br s*, CH<sub>3</sub>), 0.86 (*br s*, CH<sub>3</sub>); IR (ATR, cm<sup>-1</sup>): 3418*w*, 2956*m*, 2932*m*, 2872*w*, 1721*s*, 1583*w*, 1530*w*, 1465*m*, 1381*w*, 1264*m*, 1239*m*, 1142*s*, 1062*m*, 1019*w*, 963*m*, 944*m*, 844*w*, 769*m*, 748*m*; UV-Vis (DCM) λ<sub>max</sub> = 312 nm; GPC: M<sub>n</sub> = 32.0 kDa, PDI = 2.9.

P(BMA-S7MA) (**S10**)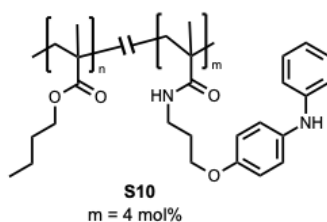

Same procedure as for **S9** using **S8** (1.0 g) and **S6** (0.26 g, 1.1 mmol). Yield: 0.86 g of an off-white solid. <sup>1</sup>H NMR (400 MHz, CDCl<sub>3</sub>) δ/ppm: 7.21 (*t*, J = 7.5 Hz, 2 arom. H), 7.06 (*d*-like *m*, "J" = 7.1 Hz, 2 arom. H), 6.92 (*d*, J = 7.7 Hz, 2 arom. H), 6.85–6.81 (*m*, 3 arom. H), 3.93 (*m*, OCH<sub>2</sub> butyl), 3.38 (*br s*, OCNHCH<sub>2</sub>), 1.99 – 1.81 (*m*, CH<sub>2</sub>), 1.60 (*br s*, CH<sub>2</sub>), 1.39 (*d*-like *m*, CH<sub>2</sub>), 1.28 – 1.21 (*br*, CH<sub>3</sub>),

## SUPPORTING INFORMATION

1.02 (*br s*, CH<sub>3</sub>), 0.95 (*br s*, CH<sub>3</sub>), 0.87 (*br s*, CH<sub>3</sub>); IR (ATR, cm<sup>-1</sup>): 3420w, 2956m, 2932m, 2872w, 1722s, 1666w, 1600w, 1511w, 1465m, 1385w, 1238m, 1142s, 1062m, 1019m, 996w, 963m, 944m, 843w, 747m, 693w; UV-Vis (DCM) λ<sub>max</sub> = 284 nm; GPC: M<sub>n</sub> = 35.5 kDa, PDI = 2.7.

## P1

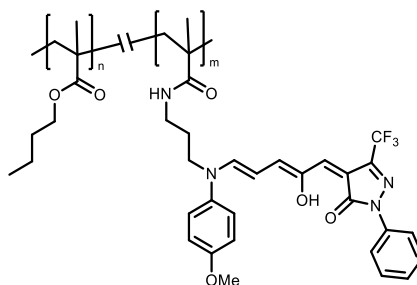

**P1**  
m = 4 mol%

To **S9** (0.25 g) dissolved in DCM (1.5 mL) in a screw cap vial was added **1** (0.30 g, 1 mmol, 0.2 g/mL) and HFIP (0.38 mL). It was stirred at 23 °C in the dark for 5 h. The reaction was monitored via UV-Vis spectroscopy by taking samples and was stopped when the absorbance value of the DASA peak plateaued. Subsequently, the solvent was removed *in vacuo* and the polymer was purified by size exclusion chromatography over Bio-Beads S-X1 Support with distilled THF as the eluent. The excess of **1** could be recovered and reused after separation from the polymer. **P1** was obtained as a deep blue solid (0.25 g). IR (ATR, cm<sup>-1</sup>): 3420w, 2956w, 2932w, 2872w, 1721s, 1600w, 1558w, 1471m, 1455m, 1379w, 1239m, 1145s, 1114s, 1062m, 1020w, 983m, 944m, 878w, 837w, 710w, 785m, 747m, 710m; NMR data in section 11.1.

## P2

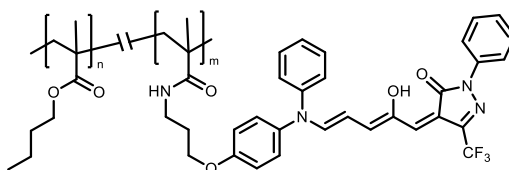

**P2**  
m = 4 mol%

Same procedure as for **P1** using **S10** (0.20 g) and **1** (0.30 g, 1 mmol, 0.2 g/mL) reacting overnight giving **P2** as a deep blue solid (0.19 g). IR (ATR, cm<sup>-1</sup>): 3420w, 2956w, 2932w, 2872w, 1722s, 1598w, 1464m, 1455m, 1385w, 1356w, 1238m, 1142s, 1062m, 1017w, 945m, 841w, 748m, 692w; NMR data in section 11.1.

### 3. Kinetics Experiments

#### 3.1 UV-Vis Spectroscopy

*In situ* UV-Vis kinetic experiments were performed between 23–25 °C under pseudo-first order conditions using a 100-fold excess of amine reagent. Stock solutions of amine and furan adduct in DCM were freshly prepared and measurements were performed by adding small amounts of stock solutions to the respective DCM/HFIP mixture in a 3 mL quartz cuvette. The absorbance was monitored with an Agilent Cary 4000 UV-Vis spectrophotometer overtime.

##### 3.1.1 Rates as Function of HFIP Concentration

Kinetic experiments were done using *N*-methylaniline and **1** for different volumetric ratios of HFIP in DCM (0–90 vol%). Measurements were performed at concentrations of 5 × 10<sup>-3</sup> M (amine) and 5 × 10<sup>-5</sup> M (furan adduct) at the absorption maximum of **1** (375 nm) and at 565 nm over the time course of 15 to 800 min (**Figure S2**). Apparent rate constants were obtained by fitting the absorbance changes to one-phase exponential decay functions using Origin 2018 software. R<sup>2</sup>-values reached >0.99 for HFIP concentrations <50 vol%. At concentrations >50 vol% the absorbance changes are not strictly mono-exponential anymore and the rate of DASA formation decreases suggesting the presence of side reactions or degradation of the activated furan. Relative rates (*k<sub>relative</sub>*) correspond to the apparent rate constants at a given HFIP concentration relative to the apparent rate constant of the reaction in pure DCM (**Figure S2d**). Note: due to

## SUPPORTING INFORMATION

the lower concentrations used in UV-Vis spectroscopic measurements the amount of HFIP relative to **1** was considerably higher than in the NMR kinetic experiments (i.e. 1 vol% HFIP corresponds to a large excess of ~1900 equivalents).

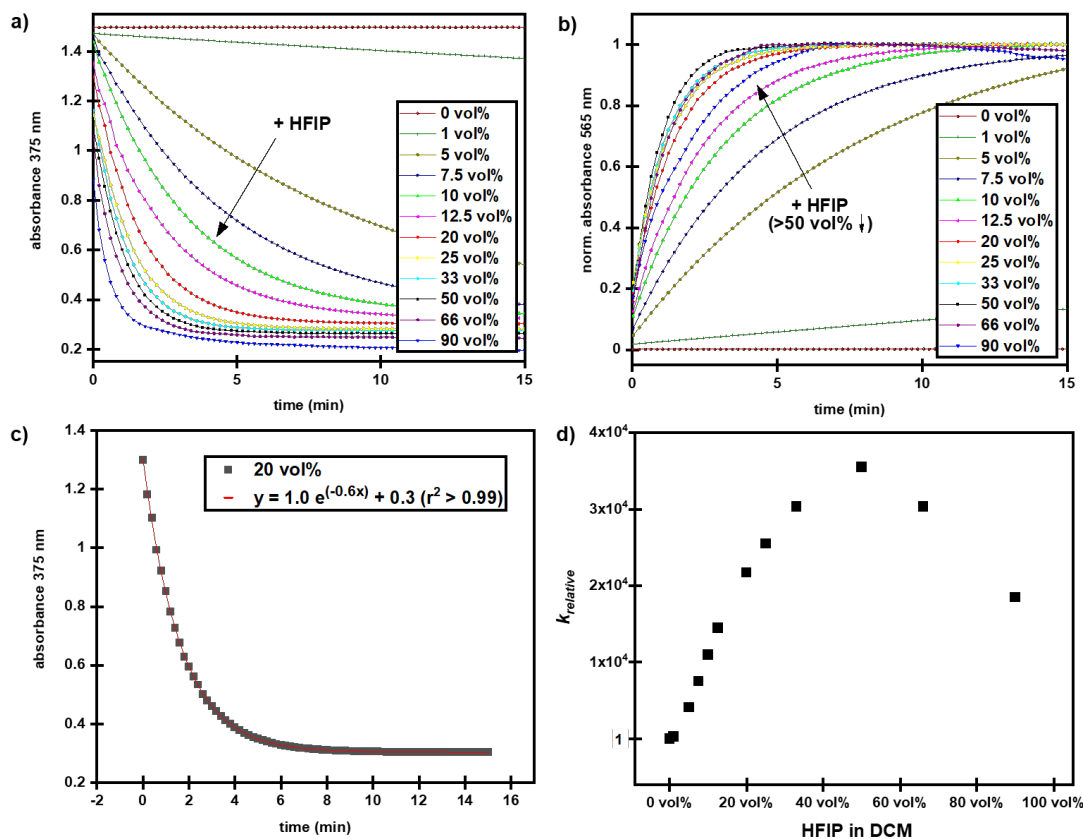

**Figure S2.** UV-Vis kinetic data for the reaction of **1** with *N*-methylaniline as a function of the HFIP concentration in DCM. a) Absorbance change at  $\lambda_{\max}$  (375 nm) of **1** as a function of time. b) Absorbance change at 565 nm as a function of time. c) Example of non-linear fit of absorbance decay at 375 nm. d) Relative reaction rates as a function of the HFIP concentration.

### 3.1.2 Alkyl vs Aryl Amines

The rate of diethylamine (DEA) and *N*-methylaniline in the reaction with **1** was compared in DCM and DCM/HFIP 20 vol%. Measurements were performed at concentrations of  $12.5 \times 10^{-4}$  M (amine) and  $12.5 \times 10^{-6}$  M (furan adduct) at  $\lambda_{\max}$  of the formed DASA in the respective solvent system (with *N*-methylaniline  $\lambda_{\max}(\text{DCM}) = 614$  nm,  $\lambda_{\max}(\text{DCM}/\text{HFIP}) = 566$  nm; with DEA  $\lambda_{\max}(\text{DCM}) = 580$  nm,  $\lambda_{\max}(\text{DCM}/\text{HFIP}) = 520$  nm).

## SUPPORTING INFORMATION

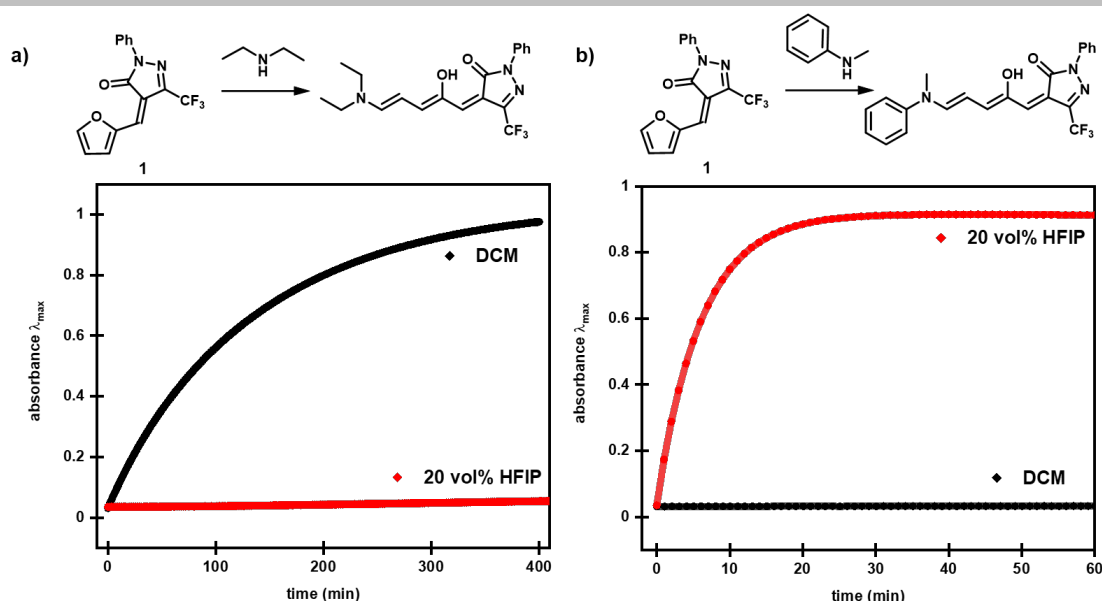

**Figure S3:** Absorbance change at  $\lambda_{\max}$  (open form DASA) overtime for the reaction of **1** with a) DEA and b) *N*-methylaniline in DCM vs. DCM/HFIP 20 vol%.

### 3.1.3 Polymers

Experiments were done by preparing stock solutions of the amine modified polymer **S9** (1 mg/mL) and **1** (1.5 mM) in THF and DCM, respectively. Measurements were performed at concentrations of 0.1 mg/mL (polymer) and  $1.5 \times 10^{-4}$  M (furan adduct) in THF or DCM/HFIP 20 vol% in 3 mL quartz cuvettes and the absorbance at  $\lambda_{\max}$  of the formed DASA in the respective solvent system for 800 min ( $\lambda_{\max}(\text{THF}) = 615$  nm,  $\lambda_{\max}(\text{DCM/HFIP}) = 566$  nm).

### 3.2 NMR Spectroscopy

*In situ* NMR experiments were performed at a concentration of 25 mM and 298 K. A solution of **1** in  $\text{CD}_2\text{Cl}_2$  (0.35 mL, 50 mM, 1.0 eq.) and a solution of *N*-methylaniline in  $\text{CD}_2\text{Cl}_2$  (0.35 mL, targeted at 55 mM, 1.1 eq.) were prepared and to the latter was added deuterated HFIP (0, 1 and 5 eq. relative to **1** or 0, ~0.2 and ~1 vol%). These solutions were combined in a standard 5 mm NMR tube and a series of 300 spectra was acquired on a time course of up to 15 hours on a Varian Unity Inova AS600 600 MHz spectrometer (delay before start of the first scan was 5 min). Conversion plots were calculated from the integrals of the signals of **1** at  $\delta = 8.89$  ppm and the signals of the *N*-methyl groups in the open ( $\delta = 3.59$  ppm) and closed ( $\delta = 2.85$  ppm) DASA respectively as given by:

$$\text{Conversion} = \frac{a}{a + \frac{b}{3} + \frac{c}{3}}$$

**a** = integrated signal of **1** (*d*, 1H, OCH, 8.89 ppm)

**b** = integrated signal *N*-Me group open form (*s*, 3H,  $\text{CH}_3$ , 3.59 ppm)

**c** = integrated signal *N*-Me group closed form (*s*, 3H,  $\text{CH}_3$ , 2.85 ppm)

The measurements were performed in triplicates. The actual amine concentrations (as determined by  $^1\text{H-NMR}$ ) varied between 1.1–1.5 equivalents relative to **1**. Analogous measurements were performed in acetonitrile- $d_3$  or by exchanging HFIP- $d_2$  with isopropanol or the methyl-ether of HFIP (HFIPME) (**Figure S4** and **Figures S8–S9**). Similar measurements on the uncatalyzed runs at higher concentration and longer reaction time (50 mM, 15 h) additionally confirmed that similar conversions are reached when the curve plateaus as for the runs with HFIP (80–85%). Also, it was found that higher excess of amine can push the conversion to >95%.

## SUPPORTING INFORMATION

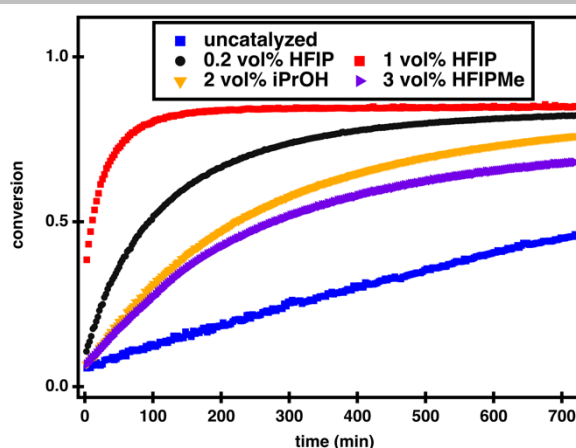

**Figure S4:** Conversion plots from *in situ* NMR experiments on the synthesis of DASA-2 in DCM ( $k$ :  $3 \text{ M}^{-1} \text{ h}^{-1}$ ) and upon addition of small quantities of different additives: *i*PrOH (2 vol%,  $k$ :  $9 \text{ M}^{-1} \text{ h}^{-1}$ ), Me-ether of HFIP (HFIPMe, 3 vol%,  $k$ :  $5 \text{ M}^{-1} \text{ h}^{-1}$ ), HFIP (0.2 vol%,  $k$ :  $12 \text{ M}^{-1} \text{ h}^{-1}$  and 1 vol%,  $k$ :  $56 \text{ M}^{-1} \text{ h}^{-1}$ ). Note: reactions were performed with similar excess of *N*-methylaniline (1.1–1.2 equivalents), except for the experiment with HFIPMe (1.5 equivalents).

### 3.2.1 Kinetic Fitting

To determine rate constants second-order kinetics was assumed. For this the following differential equation applies:

$$\frac{d[N\text{-methylaniline}]}{dt} = -k[\mathbf{1}][N\text{-methylaniline}]$$

The corresponding linearized integrated rate equation is:

$$\ln \frac{[N\text{-methylaniline}]}{[\mathbf{1}]} = k([N\text{-methylaniline}]_0 - [\mathbf{1}]_0)t + \ln \frac{[N\text{-methylaniline}]_0}{[\mathbf{1}]_0}$$

with  $[x]$  being the concentration of compound  $x$  as a function of time ( $t$ ) and  $[x]_0$  being the initial concentration of compound  $x$ . The rate constant  $k$  was calculated from the slope of the regression line in the linear regime of a  $\ln([N\text{-methylaniline}]/[\mathbf{1}])$  versus time plot (**Figures S5–S9**). The initial ratio of *N*-methylaniline to  $\mathbf{1}$  was calculated through the x-axis intersection.

**Table S1:** Determined rate constants in dichloromethane.

| Additive <sup>[a]</sup>       | $k \text{ (M}^{-1} \text{ h}^{-1}\text{)}$ |
|-------------------------------|--------------------------------------------|
| -                             | $3 \pm 1^{[b]}$                            |
| 0.2 vol% (1 eq.) HFIP         | $11.6 \pm 0.2^{[b]}$                       |
| 1 vol% (5 eq.) HFIP           | $56 \pm 5^{[b]}$                           |
| 2 vol% (10 eq.) <i>i</i> PrOH | 9                                          |
| 3 vol% (10 eq.) HFIPMe        | 5                                          |

[a] Equivalents relative to  $\mathbf{1}$ . [b] Mean values of three measurements  $\pm$  standard deviation.

## SUPPORTING INFORMATION

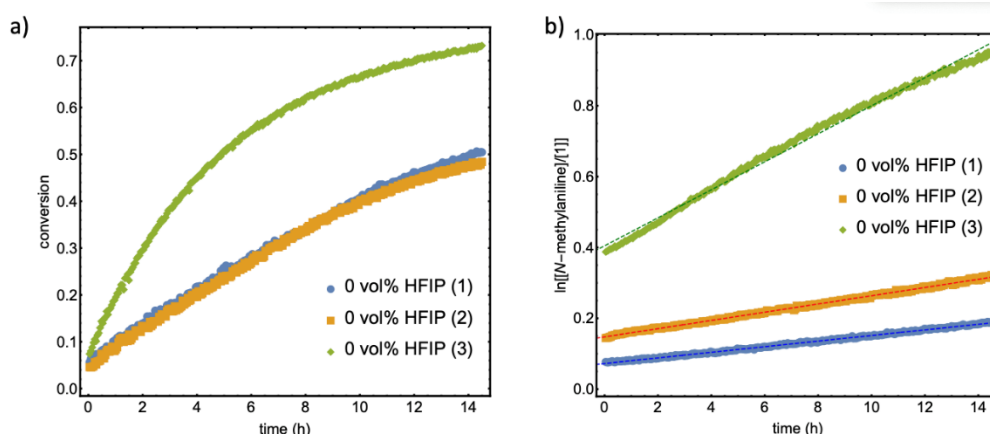

**Figure S5:** Kinetic fitting of uncatalyzed reaction of **1** with *N*-methylaniline in dichloromethane. a) Conversion of each measurement (1) 1.1 eq. (2) 1.2 eq. (3) 1.5 eq. of *N*-methylaniline. The increase in conversion of (3) in a) is due to the increased excess in *N*-methylaniline. b) Second-order kinetic fitting for each experiment. Calculated  $k$ : (1)  $4.2 \text{ M}^{-1} \text{ h}^{-1}$ ; (2)  $1.9 \text{ M}^{-1} \text{ h}^{-1}$ ; (3)  $3.2 \text{ M}^{-1} \text{ h}^{-1}$ ;  $3 \pm 1 \text{ M}^{-1} \text{ h}^{-1}$ .

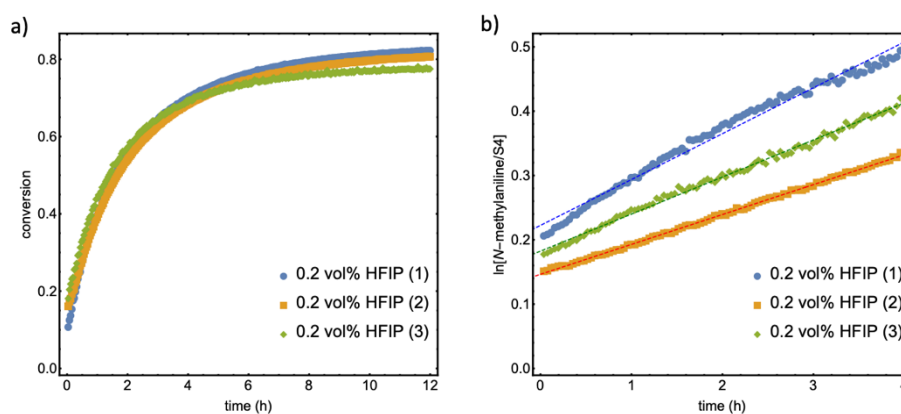

**Figure S6:** Kinetic fitting of the reaction of **1** with *N*-methylaniline in presence of 0.2 vol% (or 1 eq. relative to **1**) HFIP in dichloromethane. a) Conversion of each measurement (1) 1.3 eq. (2) 1.2 eq. (3) 1.2 eq. of *N*-methylaniline. b) Second-order kinetic fitting for each experiment. Calculated  $k$ : (1)  $11.5 \text{ M}^{-1} \text{ h}^{-1}$ ; (2)  $11.8 \text{ M}^{-1} \text{ h}^{-1}$ ; (3)  $11.5 \text{ M}^{-1} \text{ h}^{-1}$ ;  $11.6 \pm 0.2 \text{ M}^{-1} \text{ h}^{-1}$ .

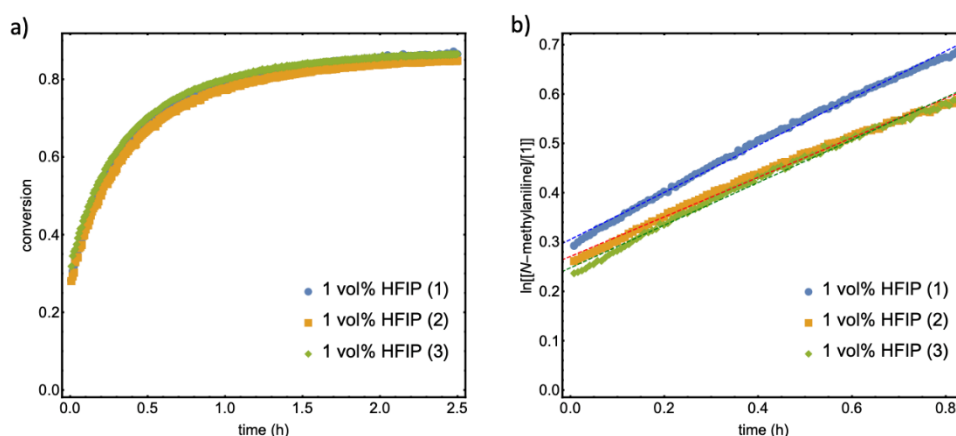

**Figure S7:** Kinetic fitting of the reaction of **1** with *N*-methylaniline in presence of 1 vol% (or 5 eq. relative to **1**) HFIP in dichloromethane. a) Conversion of each measurement (1) 1.4 eq. (2) 1.3 eq. (3) 1.3 eq. of *N*-methylaniline. b) Second-order kinetic fitting for each experiment. Calculated  $k$ : (1)  $53.5 \text{ M}^{-1} \text{ h}^{-1}$ ; (2)  $51.5 \text{ M}^{-1} \text{ h}^{-1}$ ; (3)  $61.4 \text{ M}^{-1} \text{ h}^{-1}$ ;  $56 \pm 5 \text{ M}^{-1} \text{ h}^{-1}$ .



## SUPPORTING INFORMATION

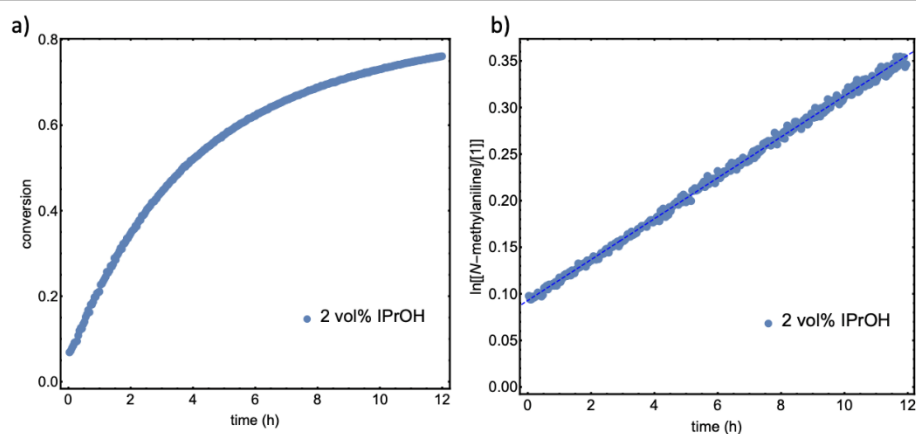

**Figure S8:** Kinetic fitting of the reaction of **1** with *N*-methylaniline in presence of 2 vol% (or 10 eq. relative to **1**) iPrOH in dichloromethane. a) Conversion, 1.1 eq. of *N*-methylaniline. b) Second-order kinetic fitting. Calculated  $k$ :  $9 \text{ M}^{-1} \text{ h}^{-1}$ .

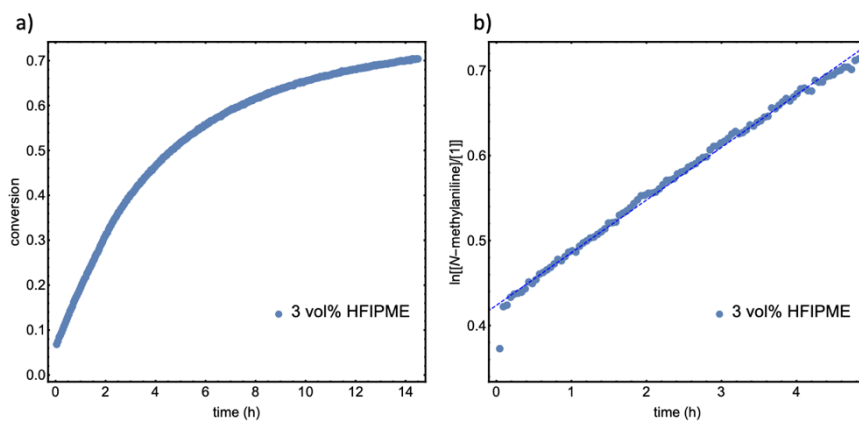

**Figure S9:** Kinetic fitting of the reaction of **1** with *N*-methylaniline in presence of 3 vol% (or 10 eq. relative to **1**) HFIPME in dichloromethane. a) Conversion, 1.5 eq. of *N*-methylaniline. b) Second-order kinetic fitting. Calculated  $k$ :  $5 \text{ M}^{-1} \text{ h}^{-1}$ .

## SUPPORTING INFORMATION

## 4. UV-Vis Absorption Spectra of Furan Adducts

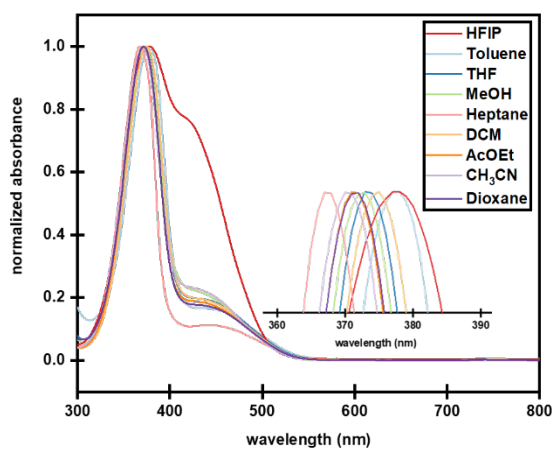

Figure S10: Normalized UV-Vis spectra of **1** in different solvents.

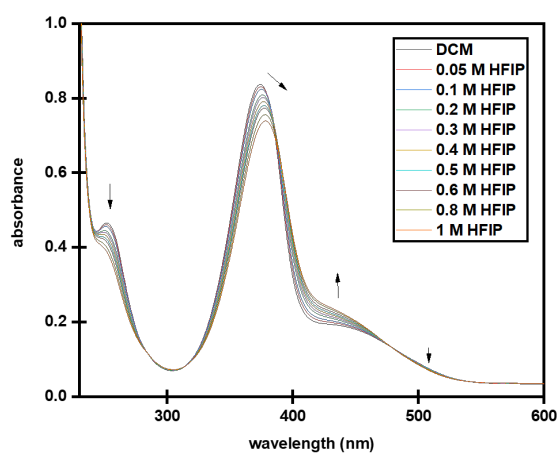

Figure S11: UV-Vis spectral changes during titration of **1** in DCM ( $2.5 \times 10^{-5}$  M) with HFIP. The concentration of HFIP is indicated in the legend.

## 5. Effects on Thermodynamic Equilibrium

## 5.1 NMR Spectroscopy

To analyze closed form formation during synthesis NMR spectra from kinetic experiments in *section 3.2* were compared at 2.5 h for differing conditions ("t= 0 h" refers to the first scan measured 5 min after setting up the reaction (**Figures S12–S17**)).

## SUPPORTING INFORMATION

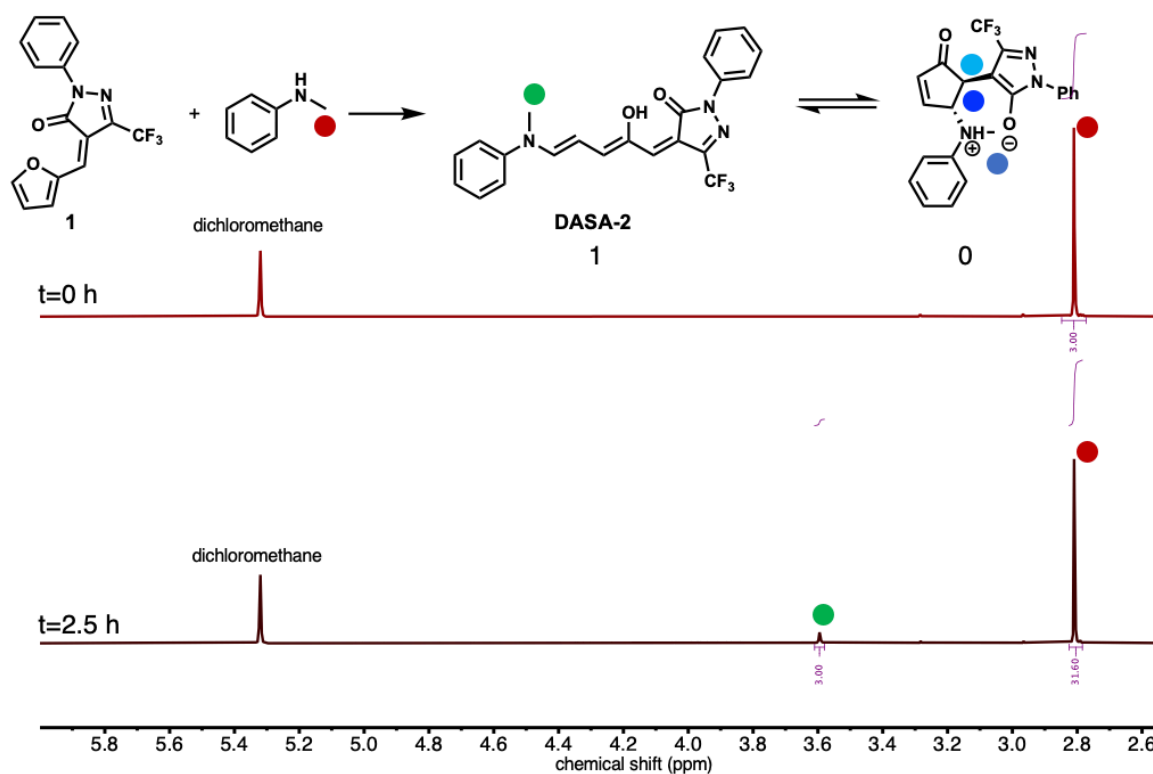

Figure S12: <sup>1</sup>H NMR (600 MHz, CD<sub>2</sub>Cl<sub>2</sub>) spectra from kinetic experiments for DASA-2 in dichloromethane at t=0 and t= 2.5 h. No closed form can be observed.

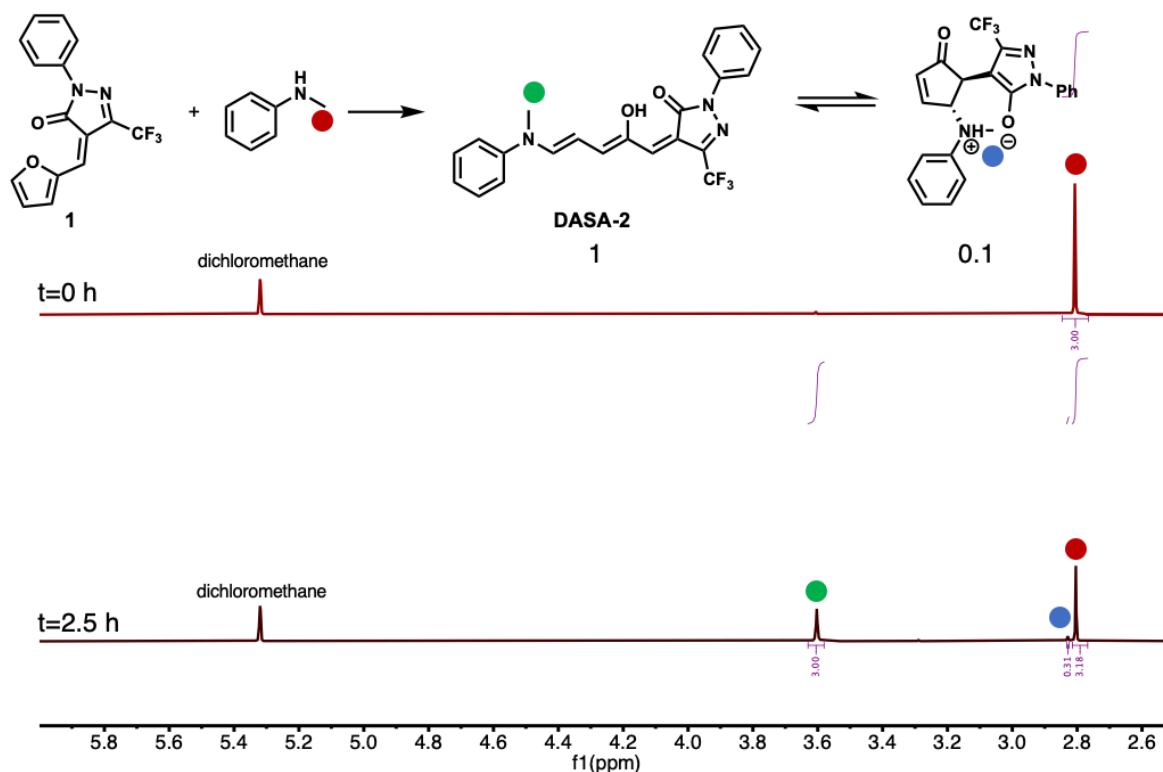

Figure S13: <sup>1</sup>H NMR (600 MHz, CD<sub>2</sub>Cl<sub>2</sub>) spectra from kinetic experiments for DASA-2 in dichloromethane at t=0 and t= 2.5 h with 1 eq. of HFIP regarding 1. 9% closed form can be observed.

## SUPPORTING INFORMATION

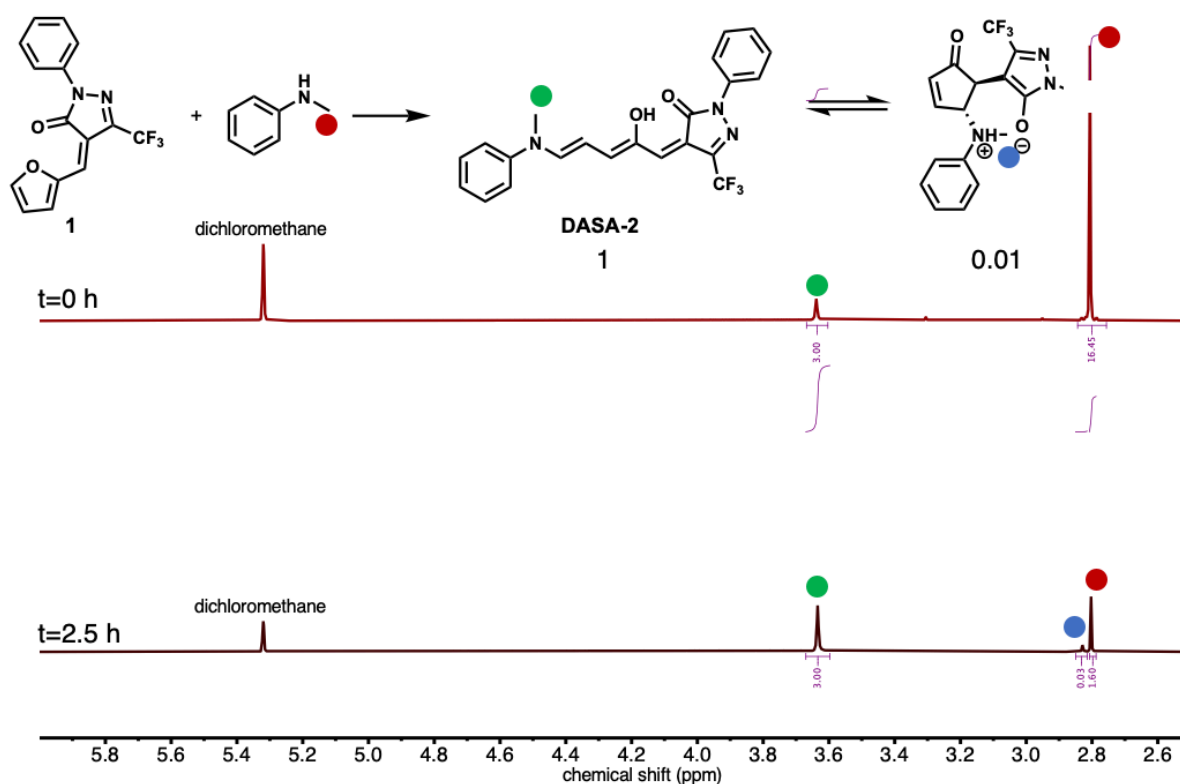

**Figure S14:**  $^1\text{H}$  NMR (600 MHz,  $\text{CD}_2\text{Cl}_2$ ) spectra from kinetic experiments for DASA-2 in dichloromethane at  $t=0$  and  $t=2.5$  h with 5 eq. of HFIP regarding 1. 1% closed form can be observed.

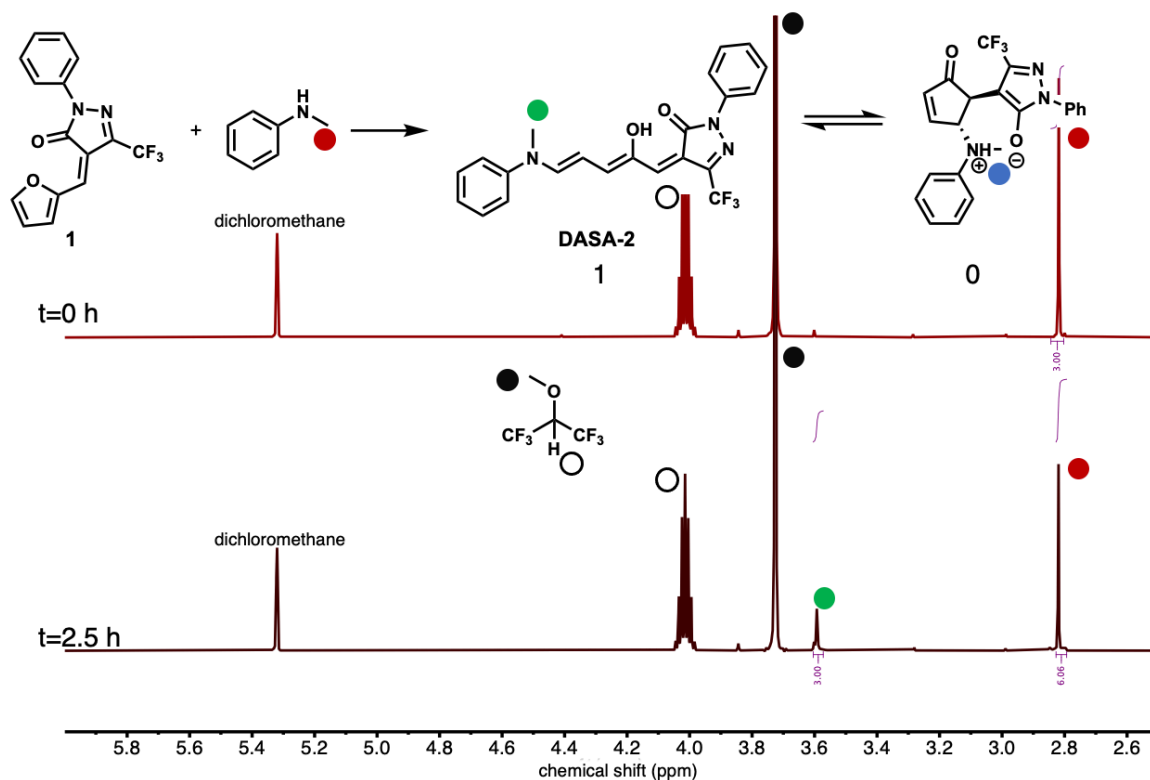

**Figure S15:**  $^1\text{H}$  NMR (600 MHz,  $\text{CD}_2\text{Cl}_2$ ) spectra from kinetic experiments for DASA-2 in dichloromethane at  $t=0$  and  $t=2.5$  h with 10 eq. of HFIPMe regarding 1. No closed form can be observed.

## SUPPORTING INFORMATION

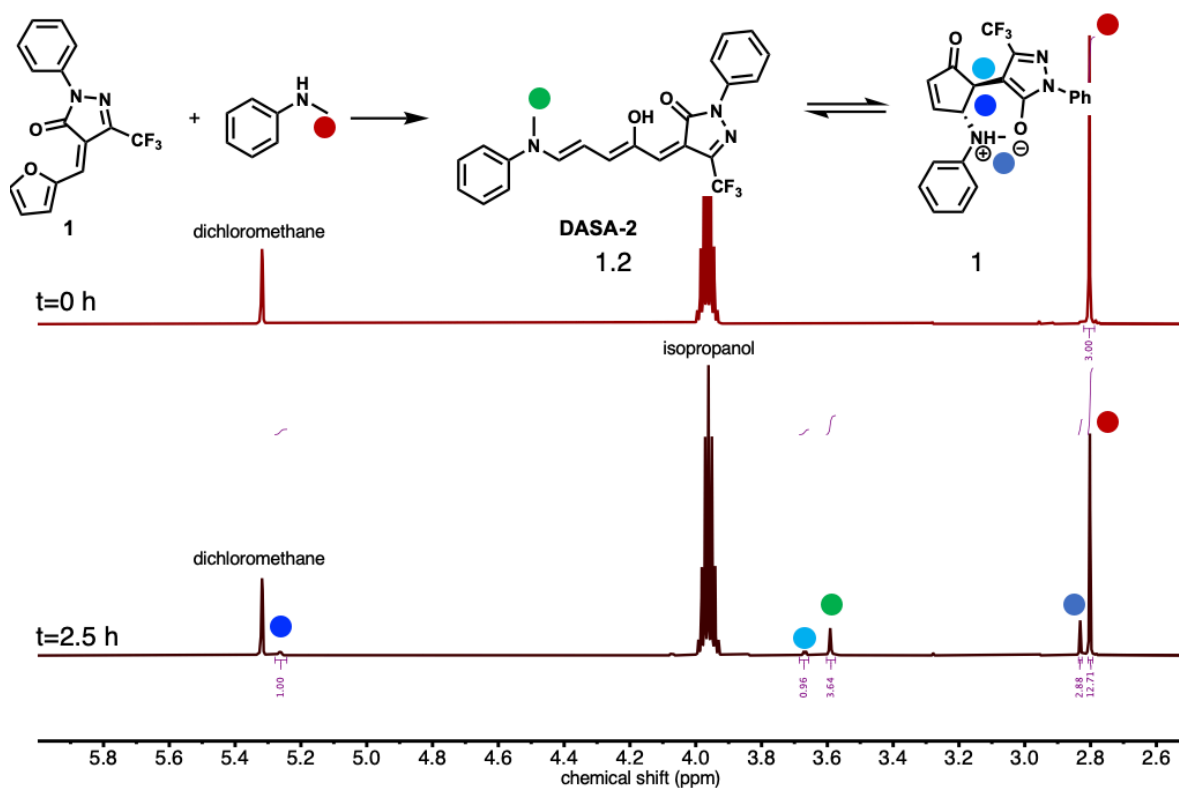

**Figure S16:**  $^1\text{H}$  NMR (600 MHz,  $\text{CD}_2\text{Cl}_2$ ) spectra from kinetic experiments for DASA-2 in dichloromethane at  $t=0$  and  $t=2.5$  h with 10 eq. of isopropanol regarding 1. 45% closed form can be observed.

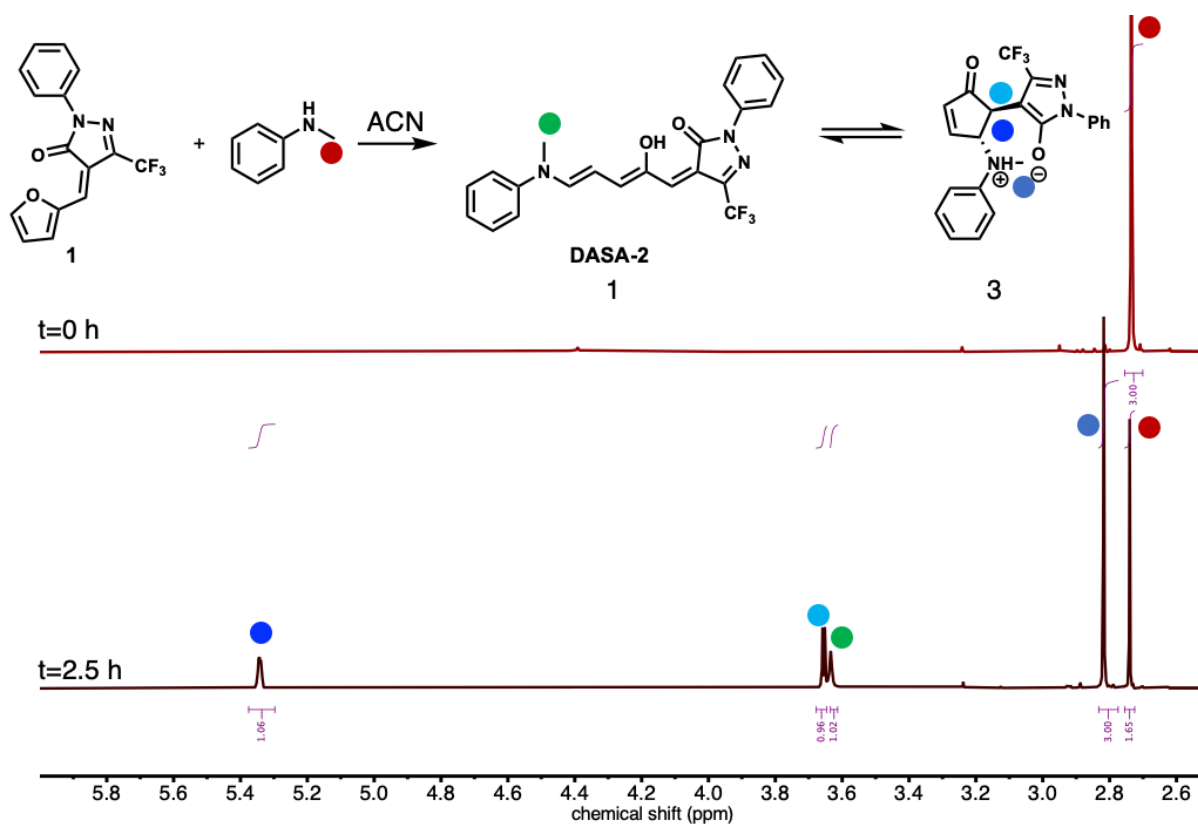

**Figure S17:**  $^1\text{H}$  NMR (600 MHz,  $\text{ACN}-d_3$ ) spectra from kinetic experiments for DASA-2 in acetonitrile at  $t=0$  and  $t=2.5$  h. 75% closed form can be observed.

## SUPPORTING INFORMATION

## 5.2 Solvatochromic Shift Analysis

For **Figure 3a** DASA-4, DASA-5, DASA-6 and DASA-7 were measured via UV-Vis spectroscopy at a concentration of 10  $\mu\text{M}$  in the following solvents: toluene ( $E_T^N$ : 0.099), diethyl ether ( $E_T^N$ : 0.117), tetrahydrofuran ( $E_T^N$ : 0.207), ethyl acetate ( $E_T^N$ : 0.228), chloroform ( $E_T^N$ : 0.259), dichloromethane ( $E_T^N$ : 0.309), acetone ( $E_T^N$ : 0.355), dimethyl sulfoxide ( $E_T^N$ : 0.444), acetonitrile ( $E_T^N$ : 0.46), methanol ( $E_T^N$ : 0.726), HFIP ( $E_T^N$ : 1.068).<sup>[13]</sup> Data for DASA-5, DASA-6 and DASA-7 was partially taken from literature.<sup>[5,10,14]</sup>

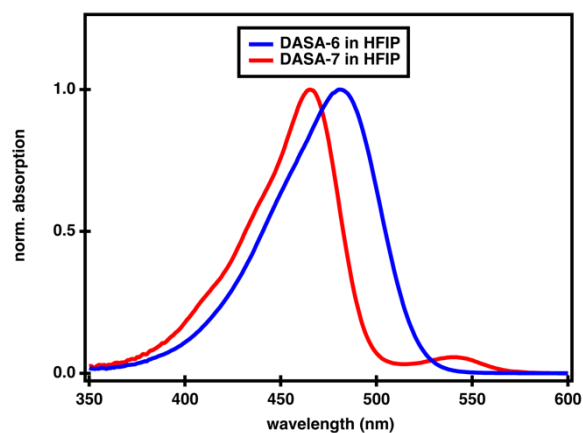

**Figure S18:** Normalized UV-Vis spectra of DASA-6 and DASA-7 in HFIP.

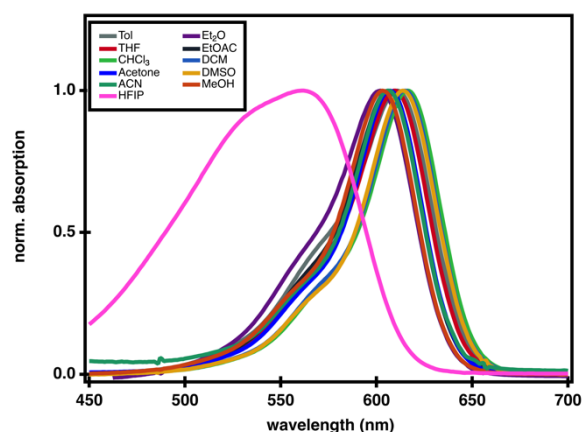

**Figure S19:** Normalized UV-Vis spectra of DASA-4 in a range of solvents.

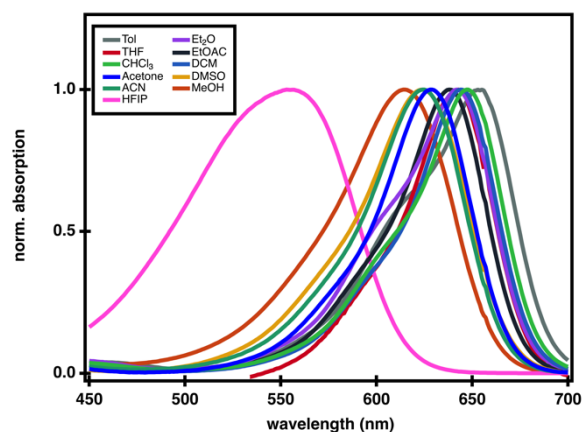

**Figure S20:** Normalized UV-Vis spectra of DASA-5 in a range of solvents.

## SUPPORTING INFORMATION

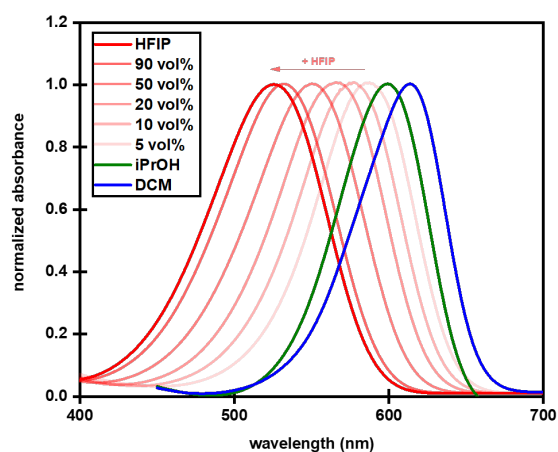

Figure S21: Normalized UV-Vis spectra of DASA-2 in DCM/HFIP mixtures and in *i*PrOH.

### 5.3 Effect of HFIP on PTSS

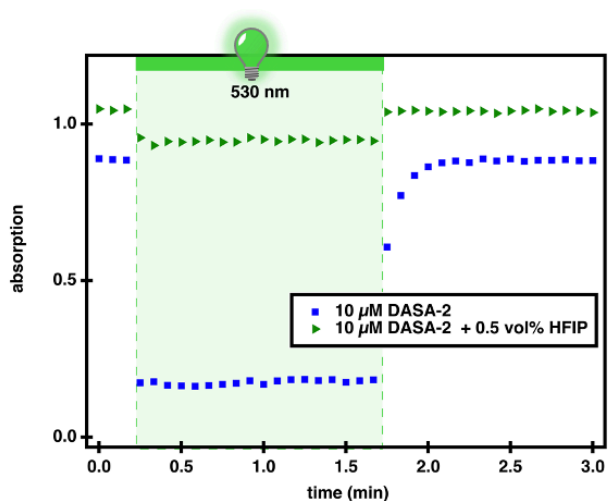

Figure S22: Time dependent UV-Vis spectroscopy to observe the photochromism of DASA-2 in dichloromethane at 10  $\mu$ M followed at  $\lambda_{\text{max}}$  (609 nm). Upon the addition of 0.5 vol% HFIP the photothermalstationary state (PTSS) decreases from 81% to 11% closed isomers.

### 6. UV-Vis Absorption Spectra

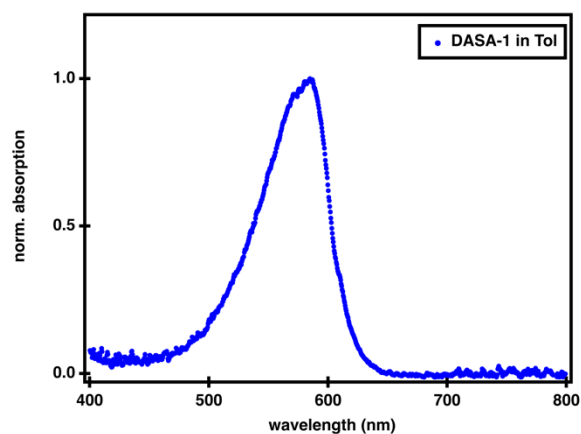

Figure S23: Normalized UV-Vis spectra of DASA-1 in toluene.  $\lambda_{\text{max}}$ : 590 nm.

## SUPPORTING INFORMATION

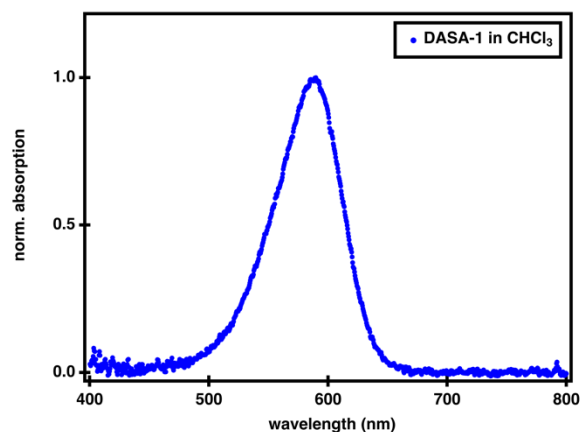

**Figure S24:** Normalized UV-Vis spectra of DASA-1 in chloroform.  $\lambda_{\text{max}}$ : 588 nm.

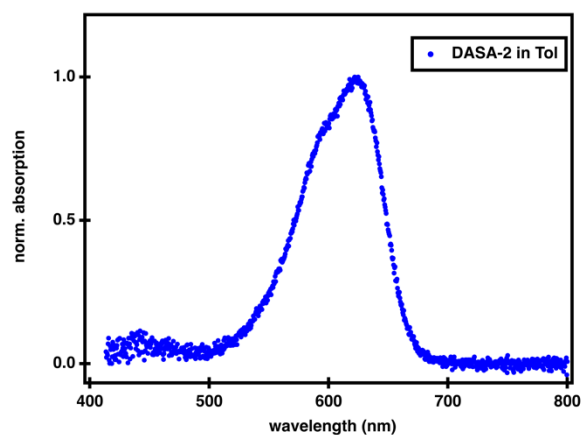

**Figure S25:** Normalized UV-Vis spectra of DASA-2 in toluene.  $\lambda_{\text{max}}$ : 625 nm.

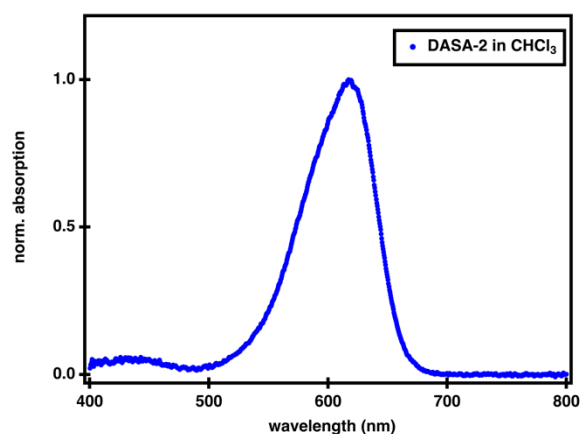

**Figure S26:** Normalized UV-Vis spectra of DASA-2 in chloroform.  $\lambda_{\text{max}}$ : 617 nm.



## SUPPORTING INFORMATION

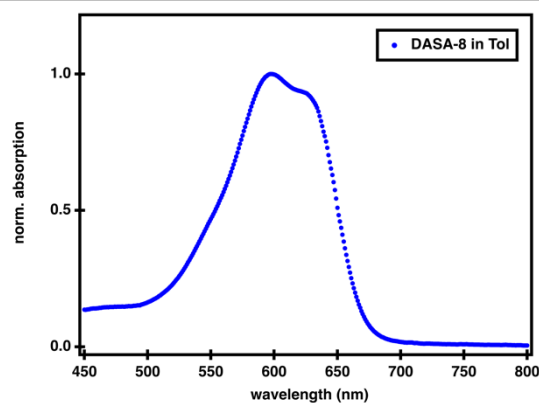

**Figure S27:** Normalized UV-Vis spectra of DASA-8 in toluene.  $\lambda_{\text{max}}$ : 598/624 nm.

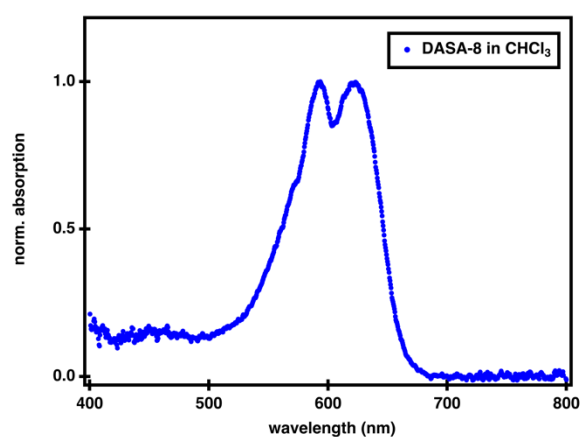

**Figure S28:** Normalized UV-Vis spectra of DASA-8 in chloroform.  $\lambda_{\text{max}}$ : 594/621 nm.

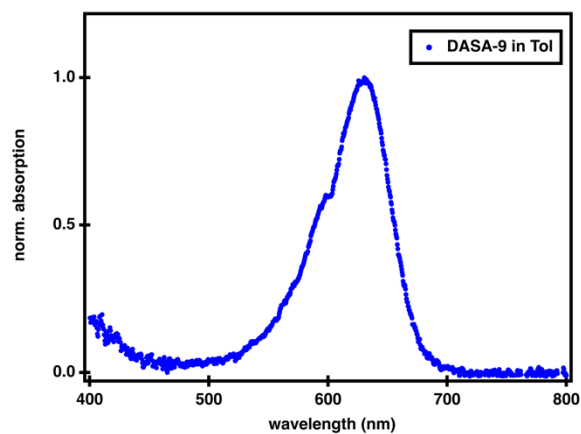

**Figure S29:** Normalized UV-Vis spectra of DASA-9 in toluene.  $\lambda_{\text{max}}$ : 631 nm.

## SUPPORTING INFORMATION

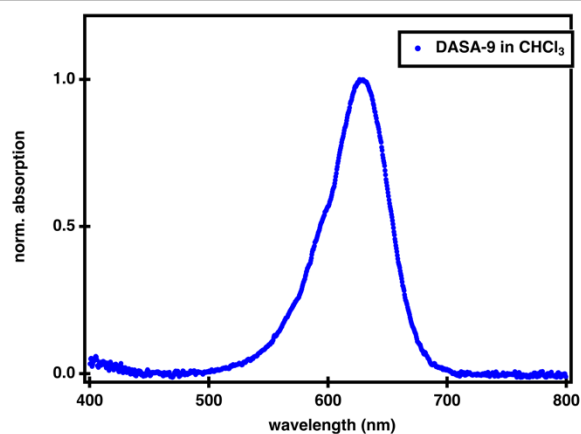

**Figure S30:** Normalized UV-Vis spectra of DASA-9 in chloroform.  $\lambda_{\text{max}}$ : 625 nm.

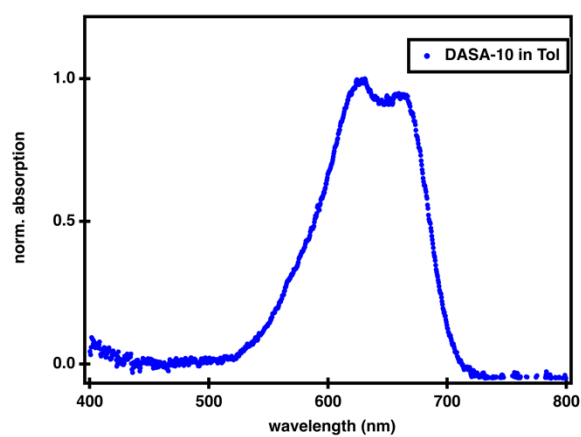

**Figure S31:** Normalized UV-Vis spectra of DASA-10 in toluene.  $\lambda_{\text{max}}$ : 630/662 nm.

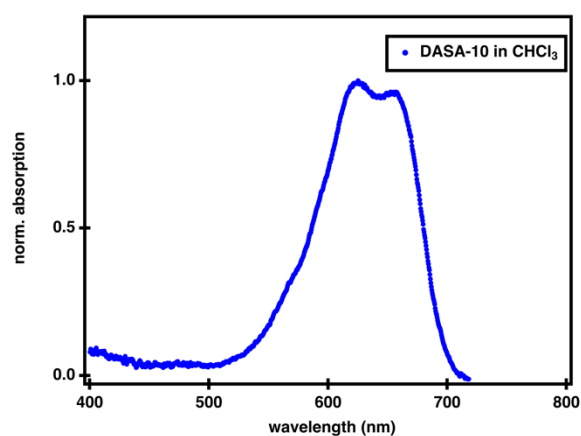

**Figure S32:** Normalized UV-Vis spectra of DASA-10 in chloroform.  $\lambda_{\text{max}}$ : 625/656 nm.

## SUPPORTING INFORMATION

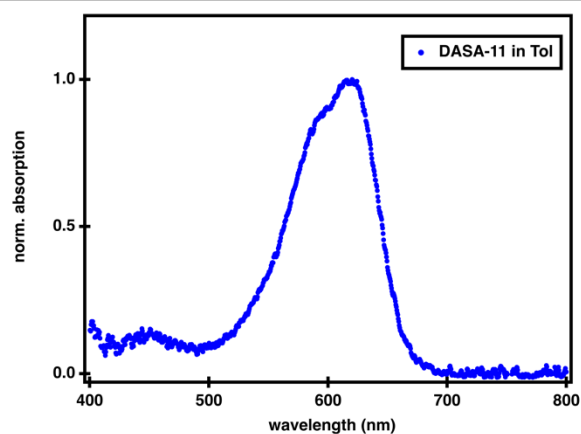

**Figure S33:** Normalized UV-Vis spectra of DASA-11 in toluene.  $\lambda_{\text{max}}$ : 623 nm.

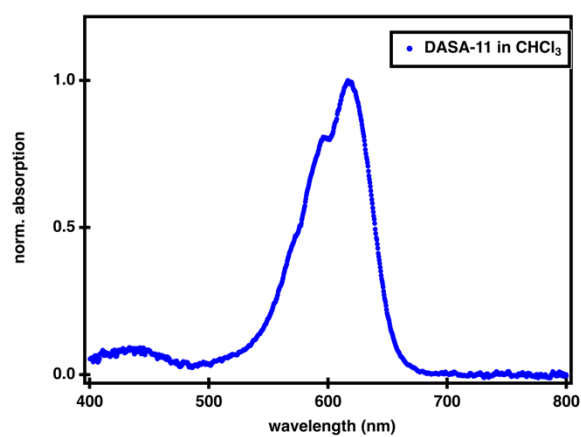

**Figure S34:** Normalized UV-Vis spectra of DASA-11 in chloroform.  $\lambda_{\text{max}}$ : 616 nm.

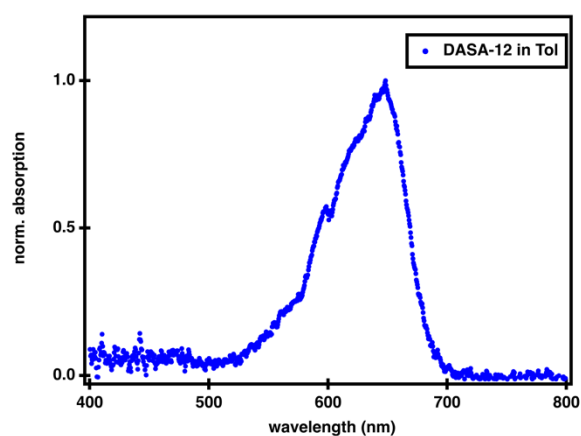

**Figure S35:** Normalized UV-Vis spectra of DASA-12 in toluene.  $\lambda_{\text{max}}$ : 647 nm.

## SUPPORTING INFORMATION

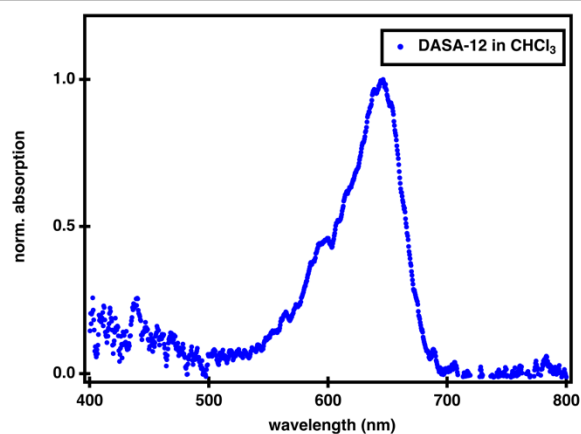

**Figure S36:** Normalized UV-Vis spectra of DASA-12 in chloroform.  $\lambda_{\text{max}}$ : 646 nm.

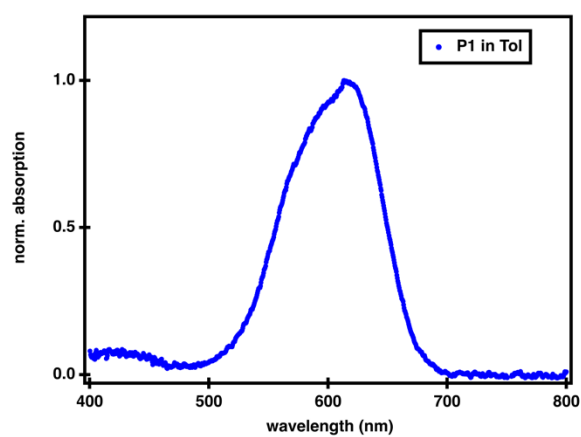

**Figure S37:** Normalized UV-Vis spectra of P1 in toluene.  $\lambda_{\text{max}}$ : 613 nm.

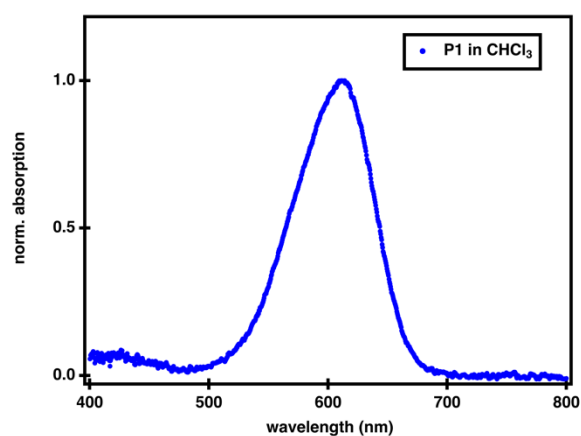

**Figure S38:** Normalized UV-Vis spectra of P1 in chloroform.  $\lambda_{\text{max}}$ : 609 nm.

## SUPPORTING INFORMATION

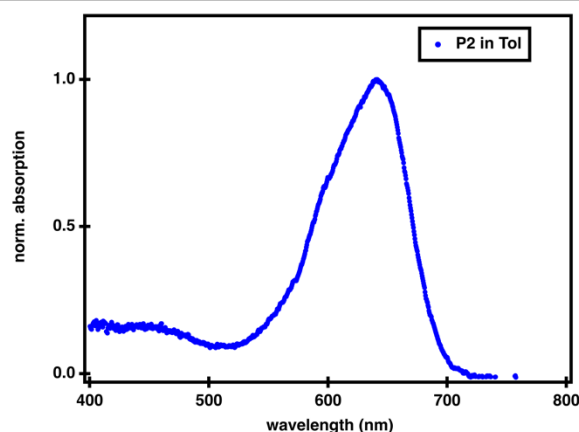

Figure S39: Normalized UV-Vis spectra of P2 in toluene.  $\lambda_{\max}$ : 641 nm.

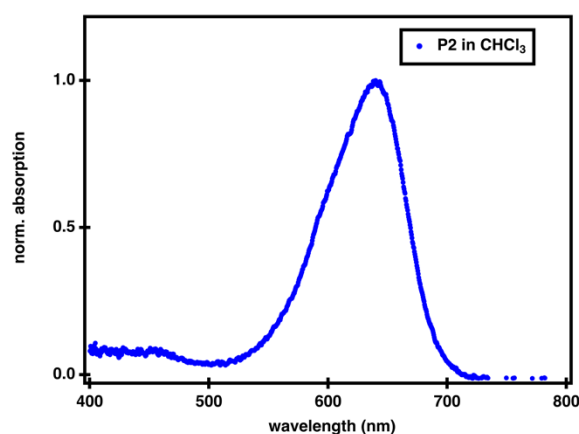

Figure S40: Normalized UV-Vis spectra of P2 in chloroform.  $\lambda_{\max}$ : 640 nm.

## 7. DFT Calculations

Density functional theory (DFT) calculations at B3LYP-GD3BJ/6-31G(d) level of theory were used for geometry optimizations of the open form DASAs to determine the dihedral angle between the acceptor and donor groups, as described before for second generation DASAs.<sup>[11]</sup> Calculations at B3LYP-GD3BJ/6-311++(d,p) level of theory were performed to predict the character of the frontier orbitals and the optical excitation energy. The calculations were performed with the Gaussian 16 Rev.A.03 software and solvent effects were considered using a conductor-like polarizable continuum model (CPCM, toluene). The calculated HOMO-LUMO gaps correlate well with the relative ordering of the experimentally observed absorption peaks, however, the absolute energies are systematically over-predicted by 0.4 eV ( $\sim 100$  nm blue-shifted  $\lambda_{\max}$  relative to experimentally determined value in toluene), which is in accordance with previous findings for second generation DASAs.<sup>[11]</sup> The calculated HOMO-LUMO gaps listed in **Table S2** were adjusted by this amount. Time-dependent DFT methods and other functionals were also tested but the predictions of the ordering of the HOMO-LUMO gaps in the series were less consistent with experimental results. Dihedral angles ( $\Phi_{D-A}$ ) between acceptor and donor groups were determined from the optimized geometries and frontier orbitals graphically represented by using the Avogadro software (**Figure S41–S42**).

## SUPPORTING INFORMATION

**Table S2.** DFT predicted  $\lambda_{\max}$  of the open form DASA compared to their actual  $\lambda_{\max}$  in nm and dihedral angles between donor and acceptor groups.

| DASA                                                                                               | Observed $\lambda_{\max}$<br>(nm) <sup>[a]</sup> | Calc. $\lambda_{\max}$<br>(nm) <sup>[b]</sup> | Deviation from<br>experimental $\lambda_{\max}$<br>(nm) | Dihedral angles $\Phi_{D-A}$ <sup>[c]</sup> |                    |
|----------------------------------------------------------------------------------------------------|--------------------------------------------------|-----------------------------------------------|---------------------------------------------------------|---------------------------------------------|--------------------|
|                                                                                                    |                                                  |                                               |                                                         | R on OH side                                | R opposite OH side |
| 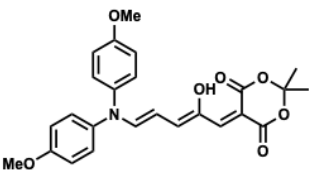 <p>DASA-1</p>    | 590                                              | 599                                           | +9                                                      | 57.6°                                       | 37.6°              |
|  <p>DASA-8</p>    | 598/624 <sup>[c]</sup>                           | 622                                           | -2                                                      | -                                           | 35.4°              |
|  <p>DASA-9</p>   | 631                                              | 633                                           | +2                                                      | 55.9°                                       | 37.5°              |
|  <p>DASA-10</p> | 630/662 <sup>[c]</sup>                           | 664                                           | +2                                                      | 0.1°                                        | 0°                 |
|  <p>DASA-11</p> | 623                                              | 611                                           | -12                                                     | 61.8°                                       | 59.3°              |

[a] Measured in toluene at concentrations of approx. 10–20  $\mu\text{M}$ . [b] The energy values were systematically over predicted by 0.4 eV and all the listed values are corrected by this value. [c] Splitting absorbance maxima were observed. See section 6 for UV-Vis spectra.

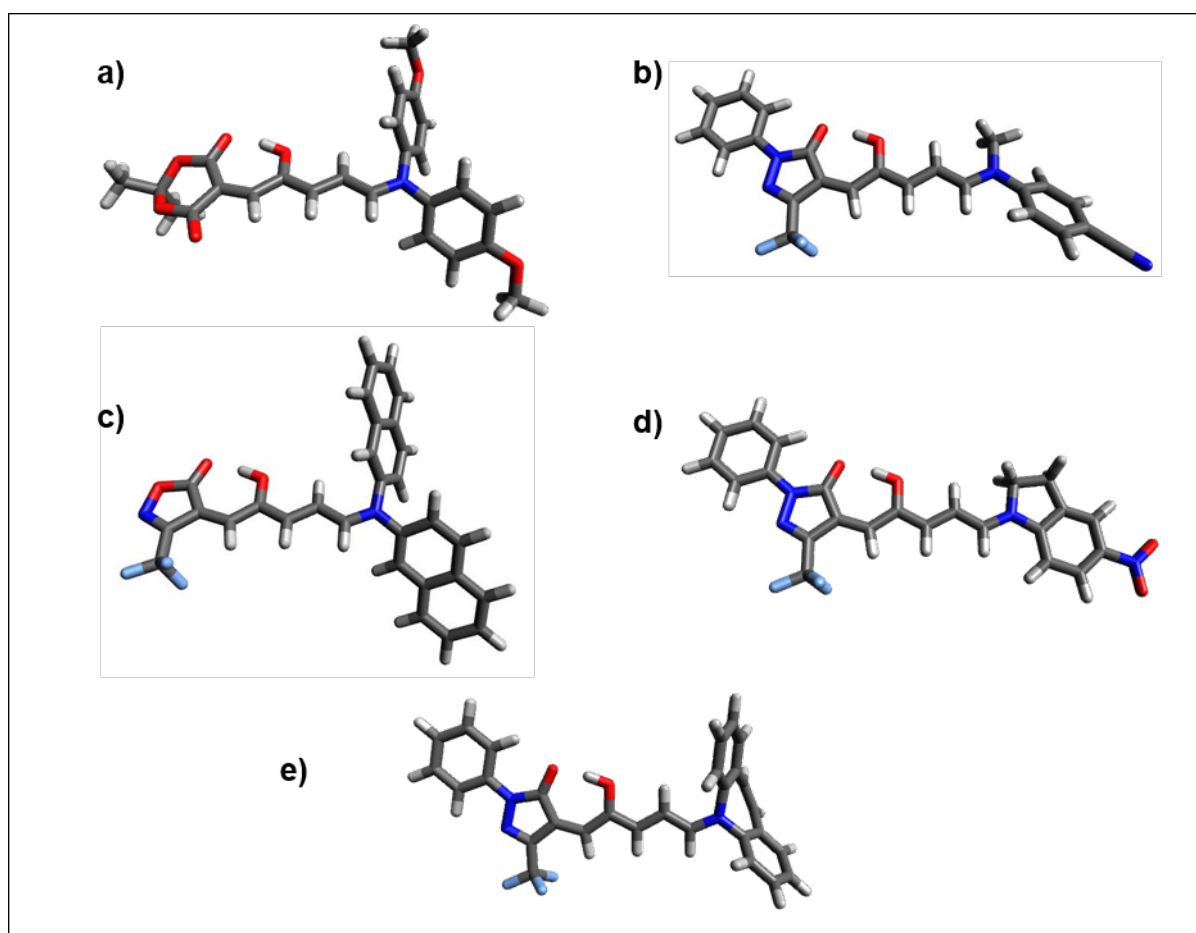

**Figure S41:** Geometry optimized structures of the open form of a) DASA-1, b) DASA-8, c) DASA-9, d) DASA-10 and e) DASA-11 calculated with DFT.

## SUPPORTING INFORMATION

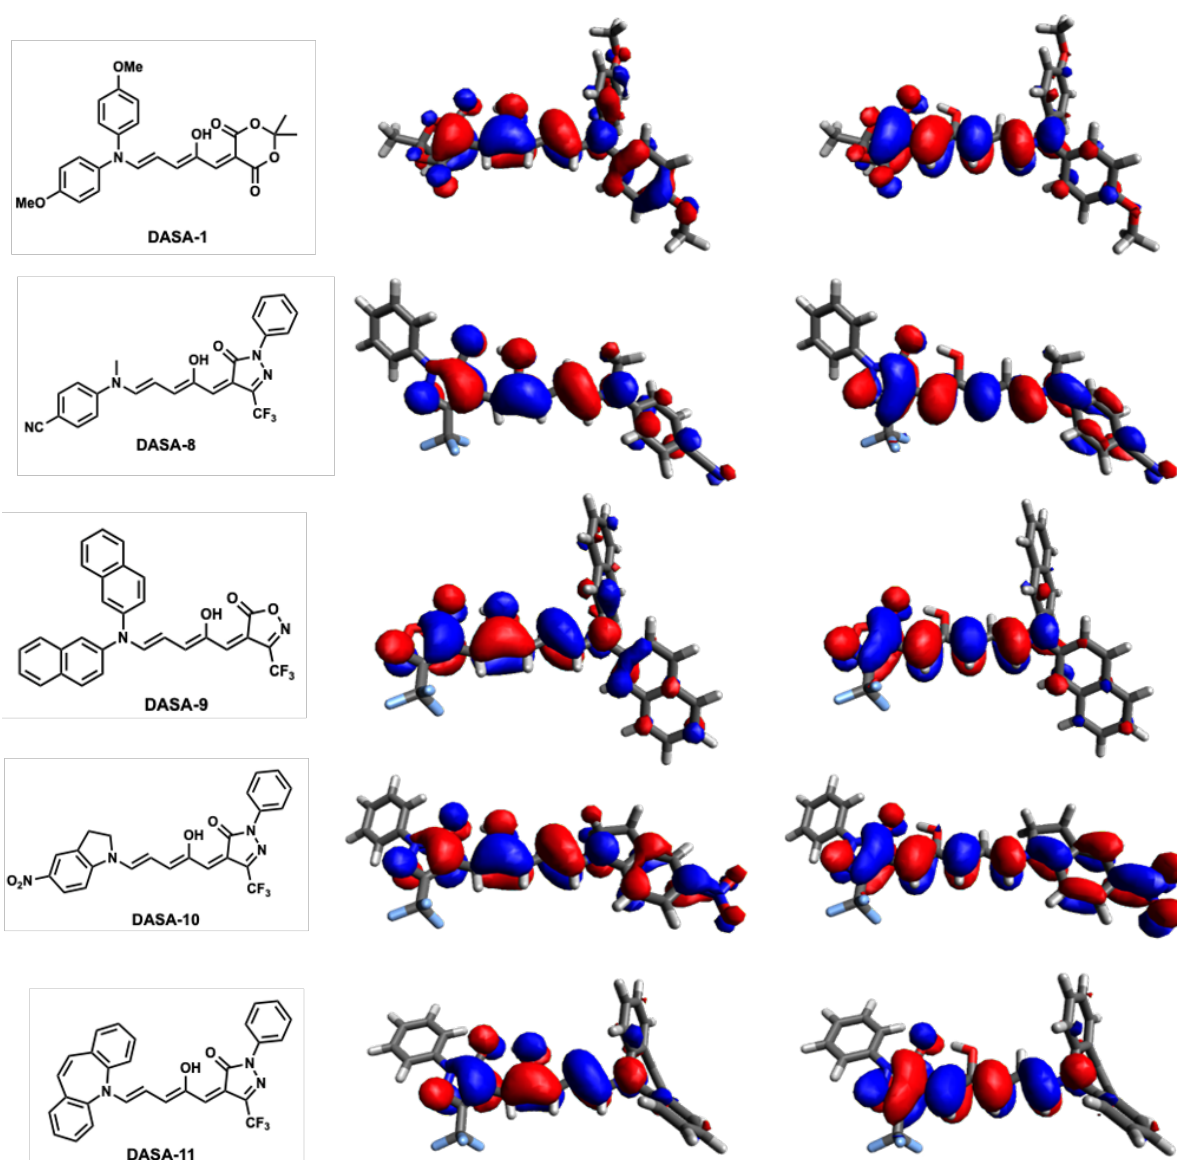

**Figure S42:** DFT predicted frontier orbitals of the open form. HOMOs are on the left, LUMOs on the right.

## 8. Photoswitching Experiments

The photoinduced optical absorption kinetics were measured on a pump-probe setup. The pump beam was generated by a light emitting diode (LED) source (Thorlabs) coupled into a multimode optical fiber terminated with an output collimator. The LED intensity was controlled through a digital-to-analog converter (National Instruments USB-6009) using LabVIEW. The probe beam was produced by High Power MINI Deuterium Tungsten Halogen Source w/shutter 200–2000 nm (Ocean Optics DH-MINI) coupled into a multimode fiber with an output collimator for the light delivery. The probe light was modulated by a shutter (Uniblitz CS25) which could be controlled manually or through a digital output port (National Instruments USB-6009) using LabVIEW. Pump and probe beams were overlapped using steering and focusing optics at a 90° angle inside a sample holder, which allowed for a 10x10 mm rectangular spectrophotometer cells that was connected to a circulating bath for temperature control. Additionally, the solutions were stirred during the measurements by a miniature stirring plate inserted into the sample holder (Starna Cells SCS 1.11). The sample holder was placed into a metal enclosure to prevent exposure to ambient light. Both pump and probe beams were nearly collimated inside the cell with a diameter of about 2 mm. The pump beam was blocked after passing through the sample and the probe beam was directed by a system of lenses into the detector (Ocean Optics Flame-S1-XR spectrometer), which acquired spectra of the probe light. The detector was connected to a PC via USB port. The experiment was controlled by a National Instrument LabVIEW program which collected the probe light spectra, determined sample optical absorption spectra, controlled pump and probe light sources, and stored the data on the computer S3 hard



## SUPPORTING INFORMATION

drive according to the experimental protocol. Experiments were performed in at 10  $\mu\text{M}$  concentration unless otherwise stated. Samples were left to equilibrate overnight prior to measurements unless otherwise stated.

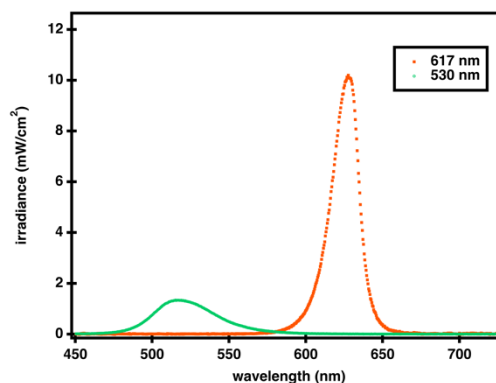

**Figure S43:** irradiance of Thorlabs 530 nm and 617 nm LED used in experiments. Total irradiance for 530 nm: 69.7 mW/cm<sup>2</sup>; 617 nm: 240.2 mW/cm<sup>2</sup>. Measured using an Ocean Optics hand-held spectrometer with cosine corrector and radiometric calibration (model USB 2000).

## 8.1 Overview Switching Parameters

**Table S3.** Photoswitching properties for novel DASAs of this report.

| DASA                                                                                          | Solvent    | $\lambda_{\text{max}}$<br>(nm) | thermal<br>equilibrium<br>(% open form<br>at eq.) | thermal<br>recovery | half-life<br>$t_{1/2}$ (s <sup>-1</sup> ) | PTSS<br>(% closed under<br>irradiation) |
|-----------------------------------------------------------------------------------------------|------------|--------------------------------|---------------------------------------------------|---------------------|-------------------------------------------|-----------------------------------------|
| 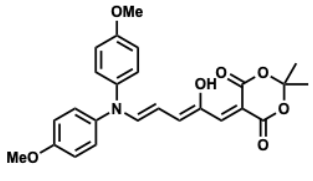<br>DASA-1 | Toluene    | 590                            | 19%                                               | -                   | -                                         | 100%                                    |
|                                                                                               | Chloroform | 588                            | 32%                                               | 100%                | 3558                                      | 100%                                    |
| <br>DASA-2 | Toluene    | 625                            | 84%                                               | 100%                | 94                                        | 100%                                    |
|                                                                                               | Chloroform | 617                            | 87%                                               | 100%                | 13                                        | 93%                                     |
| <br>DASA-5 | Chloroform | 645 <sup>[a]</sup>             | >95% <sup>[a]</sup>                               | 100% <sup>[a]</sup> | 5 <sup>[a]</sup>                          | 94% <sup>[a]</sup>                      |
|                                                                                               | Toluene    | 655 <sup>[a]</sup>             | 100% <sup>[a]</sup>                               | 88% <sup>[a]</sup>  | 40 <sup>[a]</sup>                         | 100% <sup>[a]</sup>                     |
| <br>DASA-8 | Toluene    | 598/<br>624 <sup>[b]</sup>     | insoluble                                         | -                   | -                                         | -                                       |
|                                                                                               | Chloroform | 594/<br>621 <sup>[b]</sup>     | <5%                                               | 100%                | 973                                       | n.d. <sup>[c]</sup>                     |
|                                                                                               | Toluene    | 631                            | 83%                                               | 100%                | 868                                       | 100%                                    |

## SUPPORTING INFORMATION

|                                                                                                      |            |                            |                     |                     |                     |      |
|------------------------------------------------------------------------------------------------------|------------|----------------------------|---------------------|---------------------|---------------------|------|
| 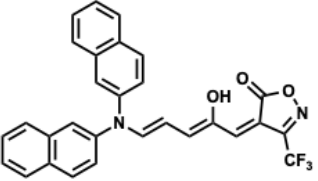<br><b>DASA-9</b>   | Chloroform | 625                        | >95%                | 100%                | 67                  | 88%  |
| <br><b>DASA-10</b>  | Toluene    | 630/<br>662 <sup>[b]</sup> | insoluble           | n.d. <sup>[d]</sup> | – <sup>[d]</sup>    | 100% |
|                                                                                                      | Chloroform | 625/<br>656 <sup>[b]</sup> | <5% <sup>[e]</sup>  | –                   | –                   | 100% |
| <br><b>DASA-11</b>  | Toluene    | 623                        | 76%                 | 100%                | 1594                | 100% |
|                                                                                                      | Chloroform | 616                        | 89%                 | 100%                | 202                 | 15%  |
| <br><b>DASA-12</b> | Toluene    | 647                        | 29%                 | n.d. <sup>[d]</sup> | 17498               | 100% |
|                                                                                                      | Chloroform | 646                        | 9%                  | 100%                | 3234 <sup>[g]</sup> | 100% |
| <b>P1</b>                                                                                            | Toluene    | 613                        | n.d. <sup>[f]</sup> | 100%                | 23                  | 40%  |
|                                                                                                      | Chloroform | 609                        | n.d. <sup>[f]</sup> | 100%                | 9                   | 29%  |
| <b>P2</b>                                                                                            | Toluene    | 641                        | n.d. <sup>[f]</sup> | 100%                | 53                  | 85%  |
|                                                                                                      | Chloroform | 640                        | n.d. <sup>[f]</sup> | 100%                | 24                  | 73%  |

All compounds were also tested in acetonitrile, but did not show any absorbance after equilibration at 10  $\mu\text{M}$ . [a] Data taken from Hemmer et al.<sup>[5]</sup> [b] Two absorbance maxima were observed. See section 6 for complete UV-Vis. [c] Conversion was not completed after 100 s of irradiation [d] Recovery was not completed after 22 h. [e] Limited solubility. [f] Equilibrium DASA signals not clearly observable by NMR spectroscopy for DASA polymers. [g] 1545 s at 100  $\mu\text{M}$ .

## SUPPORTING INFORMATION

## 8.2 Time Dependent UV-Vis Absorption Spectra

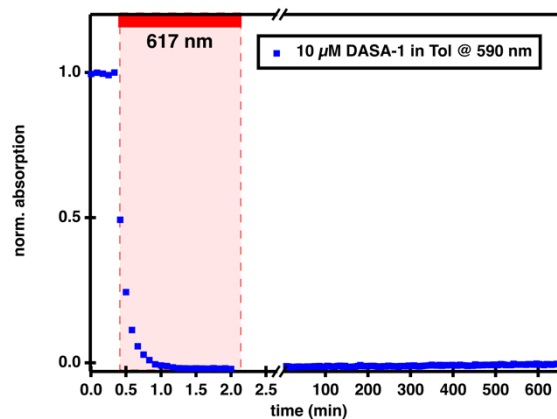

**Figure S44:** Time dependent UV-Vis spectroscopy to observe the photochromism of DASA-1 in toluene at 10  $\mu\text{M}$  (initial absorbance: 0.35) followed at  $\lambda_{\text{max}}$  (590 nm). Quantitative conversion of the open form to the closed form under light irradiation with 617 nm for 100 seconds. No subsequent thermal recovery in the dark can be observed.

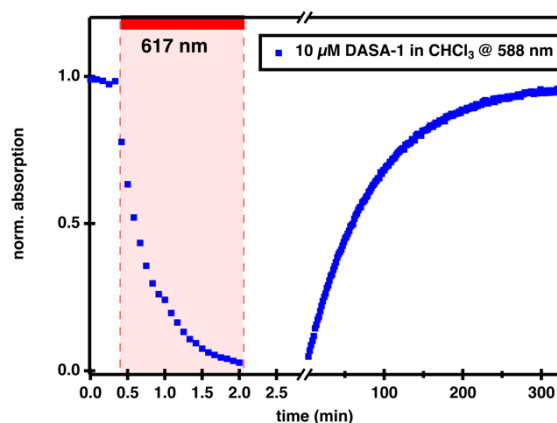

**Figure S45:** Time dependent UV-Vis spectroscopy to observe the photochromism of DASA-1 in chloroform at 10  $\mu\text{M}$  (initial absorbance: 0.41) followed at  $\lambda_{\text{max}}$  (588 nm). Quantitative conversion of the open form to the closed form under light irradiation with 617 nm for 100 seconds and subsequent thermal recovery in the dark can be observed.

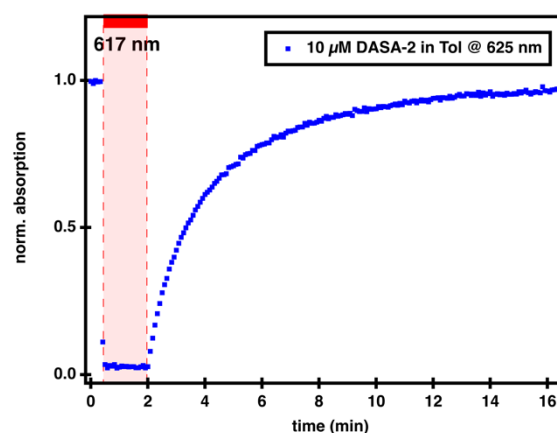

**Figure S46:** Time dependent UV-Vis spectroscopy to observe the photochromism of DASA-2 in toluene at 10  $\mu\text{M}$  (initial absorbance: 0.4) followed at  $\lambda_{\text{max}}$  (625 nm). Quantitative conversion of the open form to the closed form under light irradiation with 617 nm for 100 seconds and subsequent thermal recovery in the dark can be observed.

## SUPPORTING INFORMATION

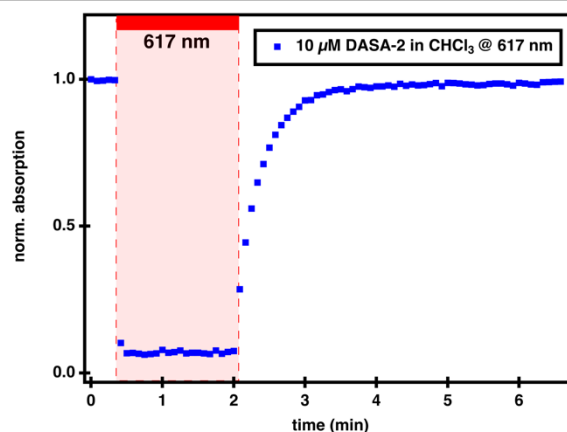

**Figure S47:** Time dependent UV-Vis spectroscopy to observe the photochromism of DASA-2 in chloroform at 10 μM (initial absorbance: 1.1) followed at  $\lambda_{\text{max}}$  (617 nm). Quantitative conversion of the open form to the closed form under light irradiation with 617 nm for 100 seconds and subsequent thermal recovery in the dark can be observed.

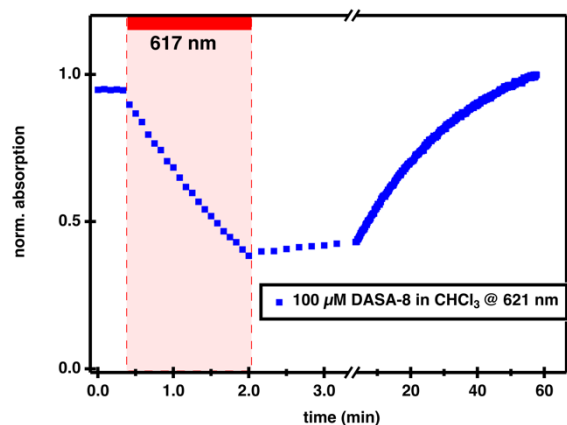

**Figure S48:** Time dependent UV-Vis spectroscopy to observe the photochromism of DASA-8 in chloroform at 100 μM (initial absorbance: 0.35) followed at  $\lambda_{\text{max}}$  (619 nm). Conversion of 60% of the open form to the closed form under light irradiation with 617 nm for 100 seconds and subsequent thermal recovery in the dark can be observed.

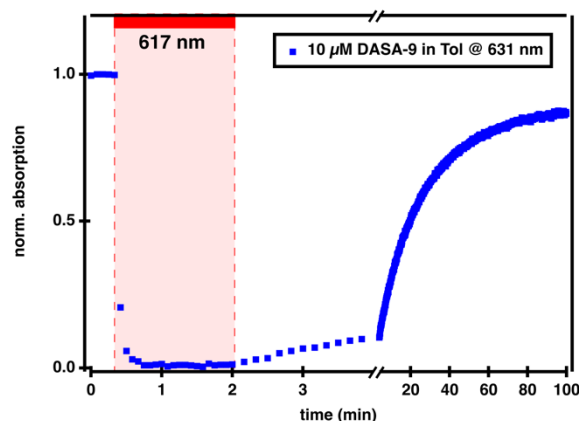

**Figure S49:** Time dependent UV-Vis spectroscopy to observe the photochromism of DASA-9 in toluene at 10 μM (initial absorbance: 0.32) followed at  $\lambda_{\text{max}}$  (631 nm). Quantitative conversion of the open form to the closed form under light irradiation with 617 nm for 100 seconds and subsequent thermal recovery in the dark can be observed.

## SUPPORTING INFORMATION

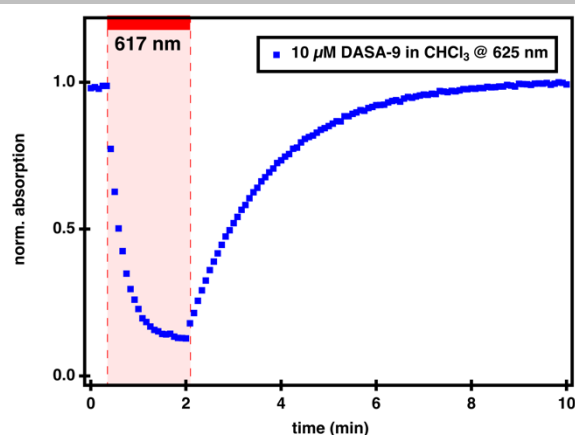

**Figure S50:** Time dependent UV-Vis spectroscopy to observe the photochromism of DASA-9 in chloroform at 10 μM (initial absorbance: 0.56) followed at  $\lambda_{\max}$  (625 nm). Conversion of 87% the open form to the closed form under light irradiation with 617 nm for 100 seconds and subsequent thermal recovery in the dark can be observed.

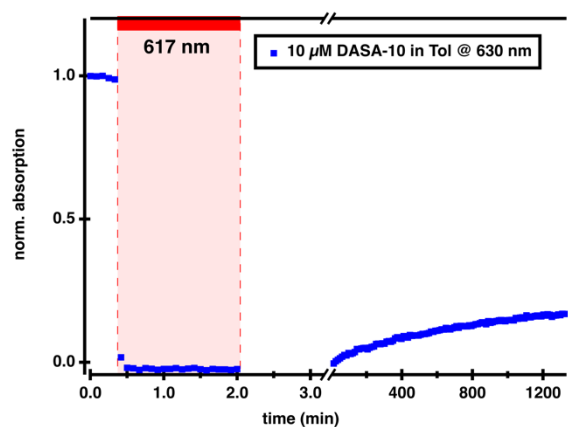

**Figure S51:** Time dependent UV-Vis spectroscopy to observe the photochromism of DASA-10 in toluene at 10 μM (initial absorbance: 0.41) followed at  $\lambda_{\max}$  (630 nm). Quantitative conversion of the open form to the closed form under light irradiation with 617 nm for 100 seconds and minimal subsequent thermal recovery in the dark can be observed.

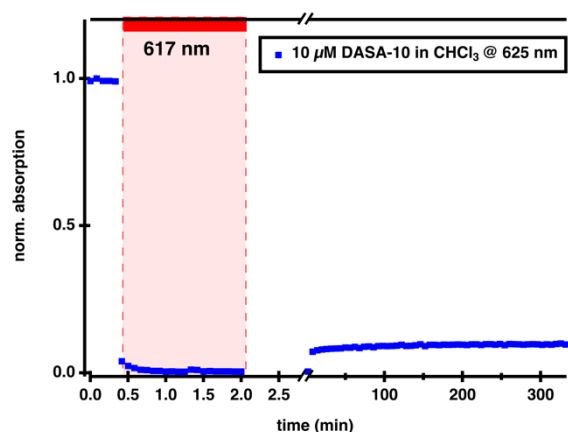

**Figure S52:** Time dependent UV-Vis spectroscopy to observe the photochromism of DASA-10 in chloroform at 10 μM (initial absorbance: 0.41) followed at  $\lambda_{\max}$  (625 nm). Quantitative conversion of the open form to the closed form under light irradiation with 617 nm for 100 seconds and minimal subsequent thermal recovery in the dark can be observed.

## SUPPORTING INFORMATION

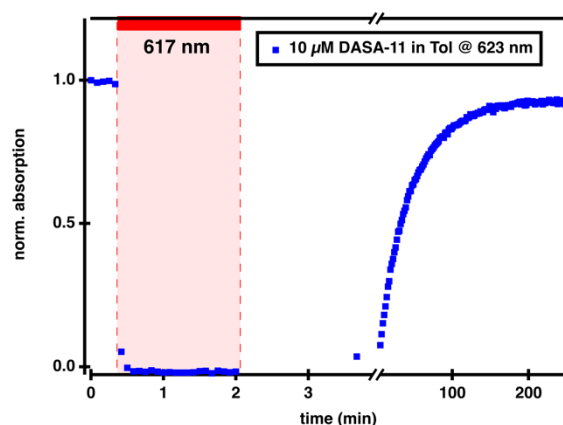

**Figure S53:** Time dependent UV-Vis spectroscopy to observe the photochromism of DASA-11 in toluene at 10  $\mu\text{M}$  (initial absorbance: 0.31) followed at  $\lambda_{\text{max}}$  (623 nm). Quantitative conversion of the open form to the closed form under light irradiation with 617 nm for 100 seconds and subsequent thermal recovery in the dark can be observed.

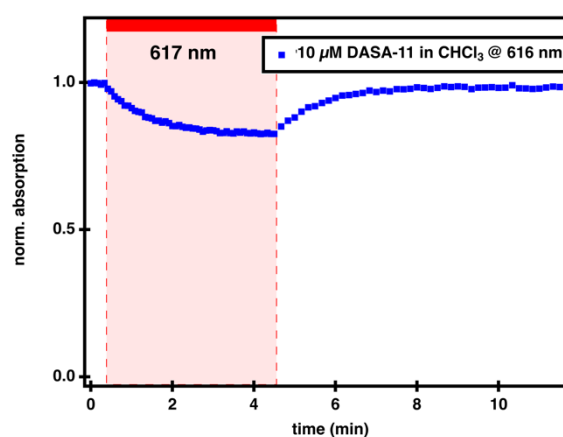

**Figure S54:** Time dependent UV-Vis spectroscopy to observe the photochromism of DASA-11 in chloroform at 10  $\mu\text{M}$  (initial absorbance: 0.56) followed at  $\lambda_{\text{max}}$  (616 nm). Conversion of 18% of the open form to the closed form under light irradiation with 617 nm for 100 seconds and subsequent thermal recovery in the dark can be observed.

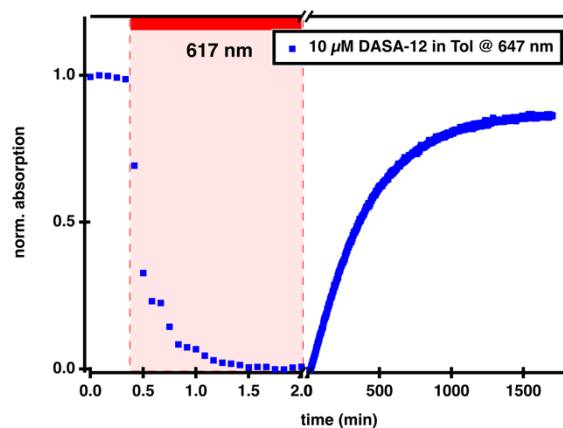

**Figure S55:** Time dependent UV-Vis spectroscopy to observe the photochromism of DASA-12 in toluene at 10  $\mu\text{M}$  (initial absorbance: 0.43) followed at  $\lambda_{\text{max}}$  (647 nm). Quantitative conversion of the open form to the closed form under light irradiation with 617 nm for 100 seconds and subsequent thermal recovery in the dark can be observed.

## SUPPORTING INFORMATION

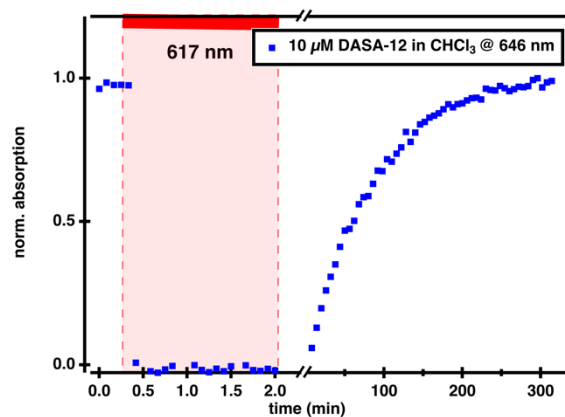

**Figure S56:** Time dependent UV-Vis spectroscopy to observe the photochromism of DASA-12 in chloroform at 10  $\mu\text{M}$  (initial absorbance: 0.05) followed at  $\lambda_{\text{max}}$  (646 nm). Quantitative conversion of the open form to the closed form under light irradiation with 617 nm for 100 seconds and subsequent thermal recovery in the dark can be observed.

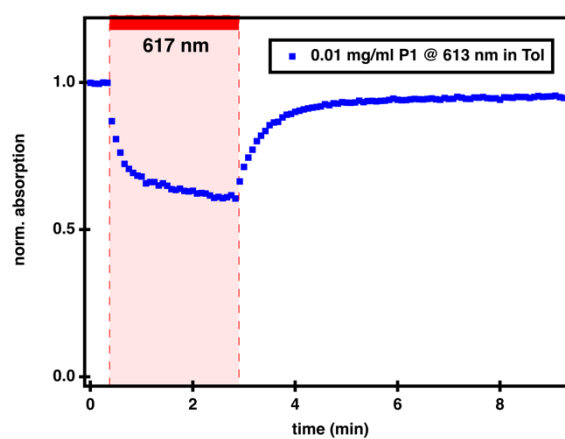

**Figure S57:** Time dependent UV-Vis spectroscopy to observe the photochromism of P1 in toluene at 0.01 mg/mL (initial absorbance: 0.76) followed at  $\lambda_{\text{max}}$  (613 nm). Conversion of 40% of the open form to the closed form under light irradiation with 617 nm for 150 seconds and subsequent thermal recovery in the dark can be observed.

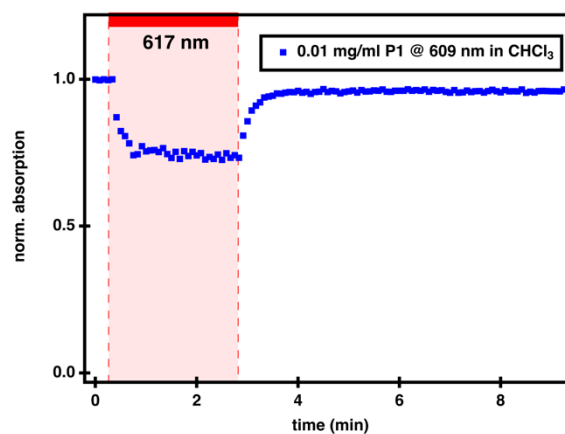

**Figure S58:** Time dependent UV-Vis spectroscopy to observe the photochromism of P1 in chloroform at 0.01 mg/mL (initial absorbance: 0.73) followed at  $\lambda_{\text{max}}$  (609 nm). Conversion of 29% of the open form to the closed form under light irradiation with 617 nm for 150 seconds and subsequent thermal recovery in the dark can be observed.

## SUPPORTING INFORMATION

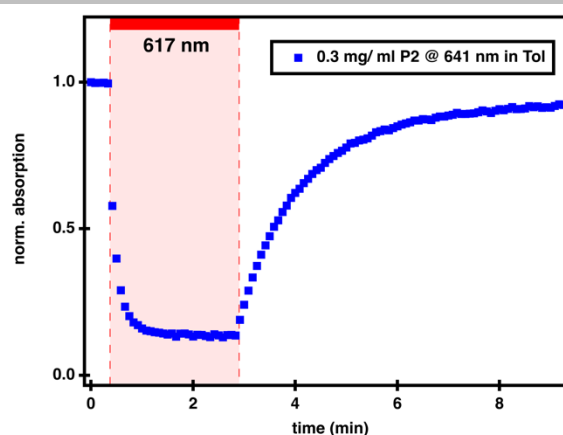

**Figure S59:** Time dependent UV-Vis spectroscopy to observe the photochromism of **P2** in toluene at 0.3 mg/mL (initial absorbance: 0.76) followed at  $\lambda_{\max}$  (641 nm). Conversion of 85% of the open form to the closed form under light irradiation with 617 nm for 150 seconds and subsequent thermal recovery in the dark can be observed.

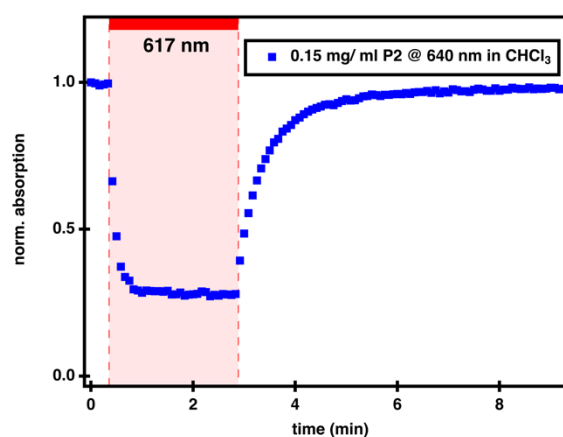

**Figure S60:** Time dependent UV-Vis spectroscopy to observe the photochromism of **P2** in chloroform at 0.15 mg/mL (initial absorbance: 0.88) followed at  $\lambda_{\max}$  (640 nm). Conversion of 72% of the open form to the closed form under light irradiation with 617 nm for 150 seconds and subsequent thermal recovery in the dark can be observed.

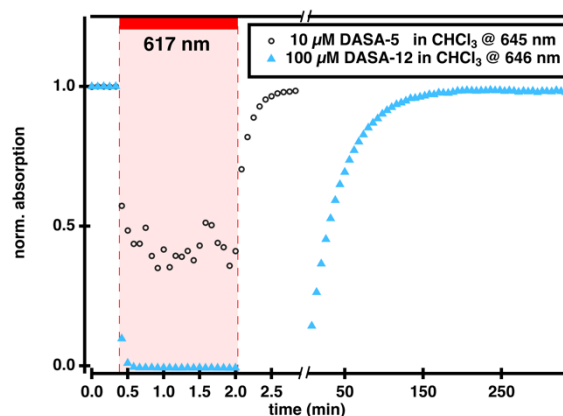

**Figure S61:** Time dependent UV-Vis spectroscopy to observe the photochromism of **DASA-5** and **DASA-12** in chloroform at 10  $\mu\text{M}$  and 100  $\mu\text{M}$  (initial absorbance: 0.9 and 1.0) followed at  $\lambda_{\max}$  (645 nm and 646 nm). Quantitative conversion of the open form to the closed form under light irradiation with 617 nm for 100 seconds and subsequent thermal recovery in the dark can be observed. The half-life of the closed isomer of **DASA-12** is 1545 s at 100  $\mu\text{M}$ . This difference from the value of 10  $\mu\text{M}$  is due to the concentration dependence of **DASA**.



## SUPPORTING INFORMATION

## 8.3 Thermodynamic Equilibrium NMR Spectroscopy

Samples were stored in the dark at room temperature overnight. Closed and open isomer were identified by  $^1\text{H}$  NMR spectroscopy (Figures S62–S73).

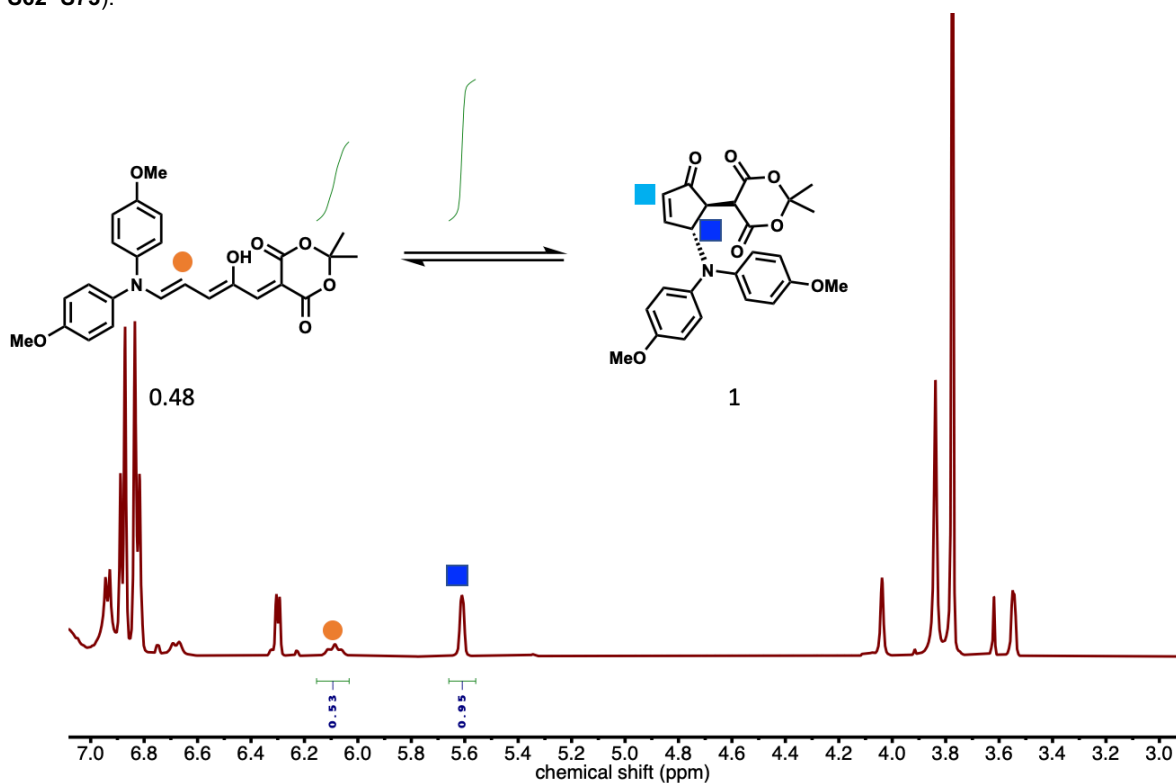

Figure S62:  $^1\text{H}$  NMR (600 MHz,  $\text{CDCl}_3$ ) spectra of the equilibrated DASA-1.

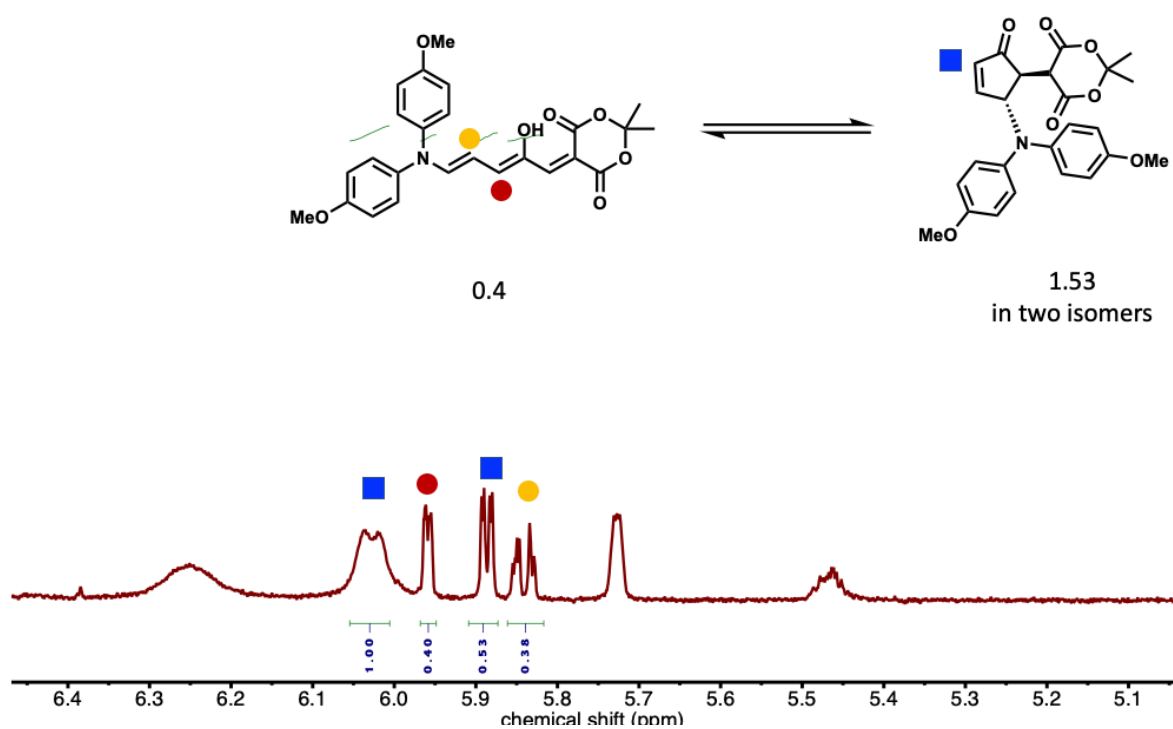

Figure S63:  $^1\text{H}$  NMR (600 MHz,  $\text{Tol-}d_8$ ) spectra of the equilibrated DASA-1.

## SUPPORTING INFORMATION

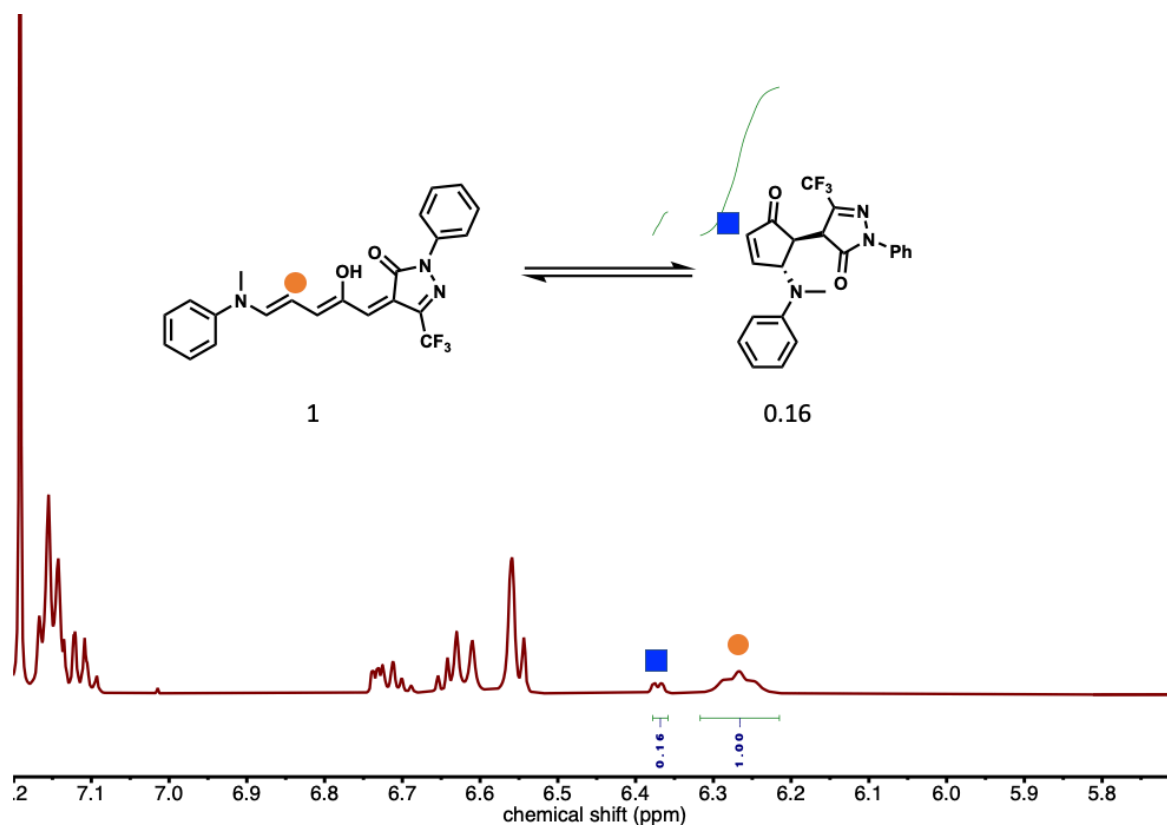

Figure S64:  $^1\text{H}$  NMR (600 MHz,  $\text{CDCl}_3$ ) spectra of the equilibrated DASA-2.

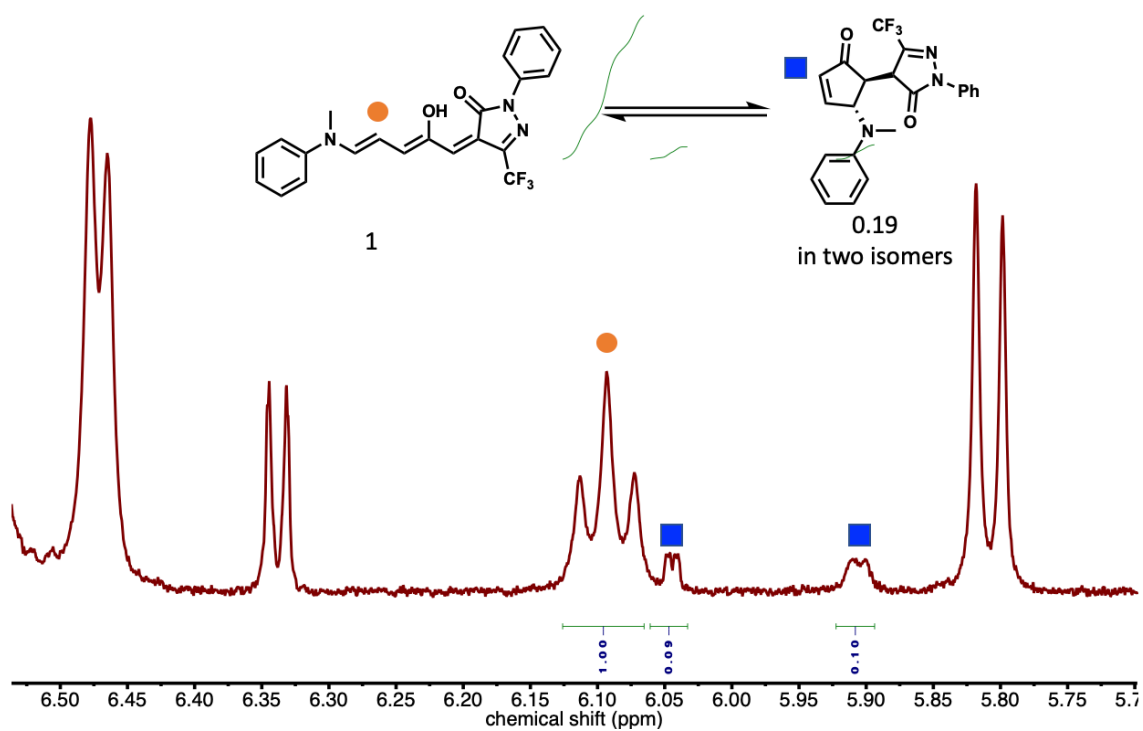

Figure S65:  $^1\text{H}$  NMR (600 MHz,  $\text{Tol-}d_8$ ) spectra of the equilibrated DASA-2.

## SUPPORTING INFORMATION

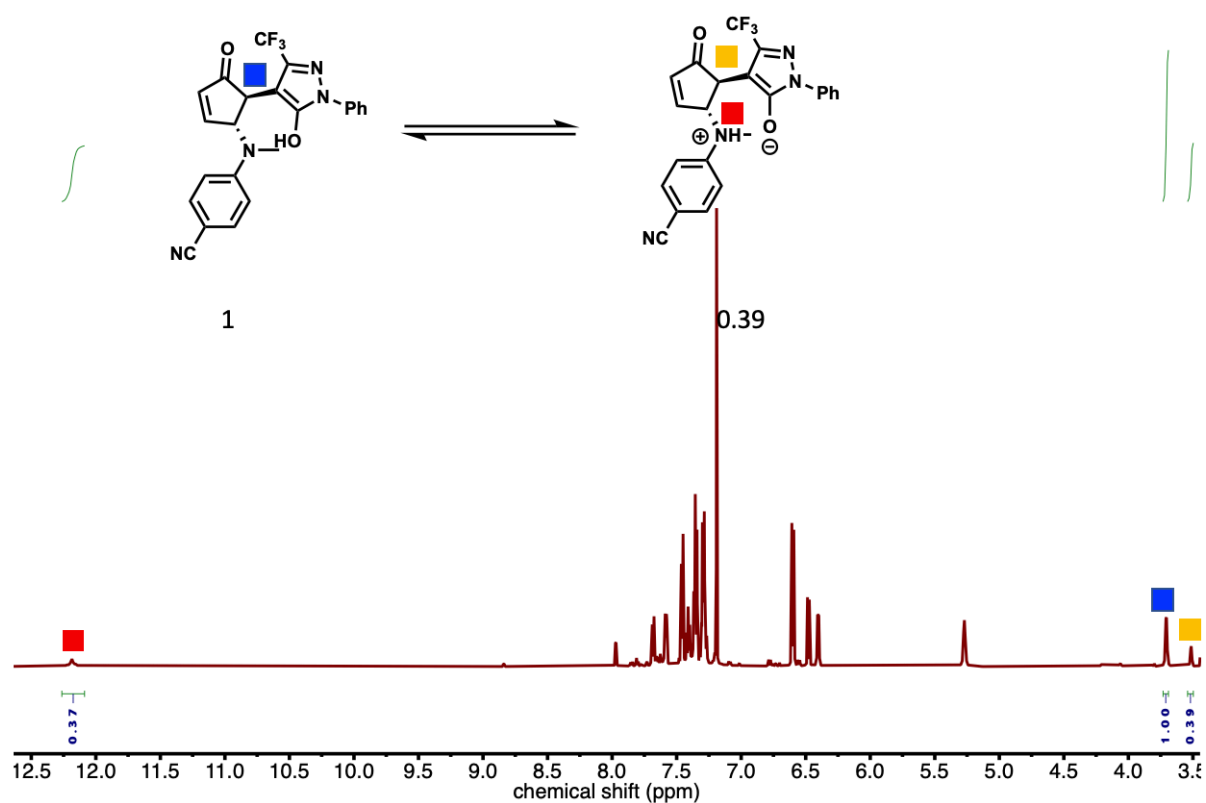

**Figure S66:**  $^1\text{H}$  NMR (600 MHz,  $\text{CDCl}_3$ ) spectra of the equilibrated DASA-8. No equilibration to the open form can be observed, but a zwitterionic closed isomer is formed over time.

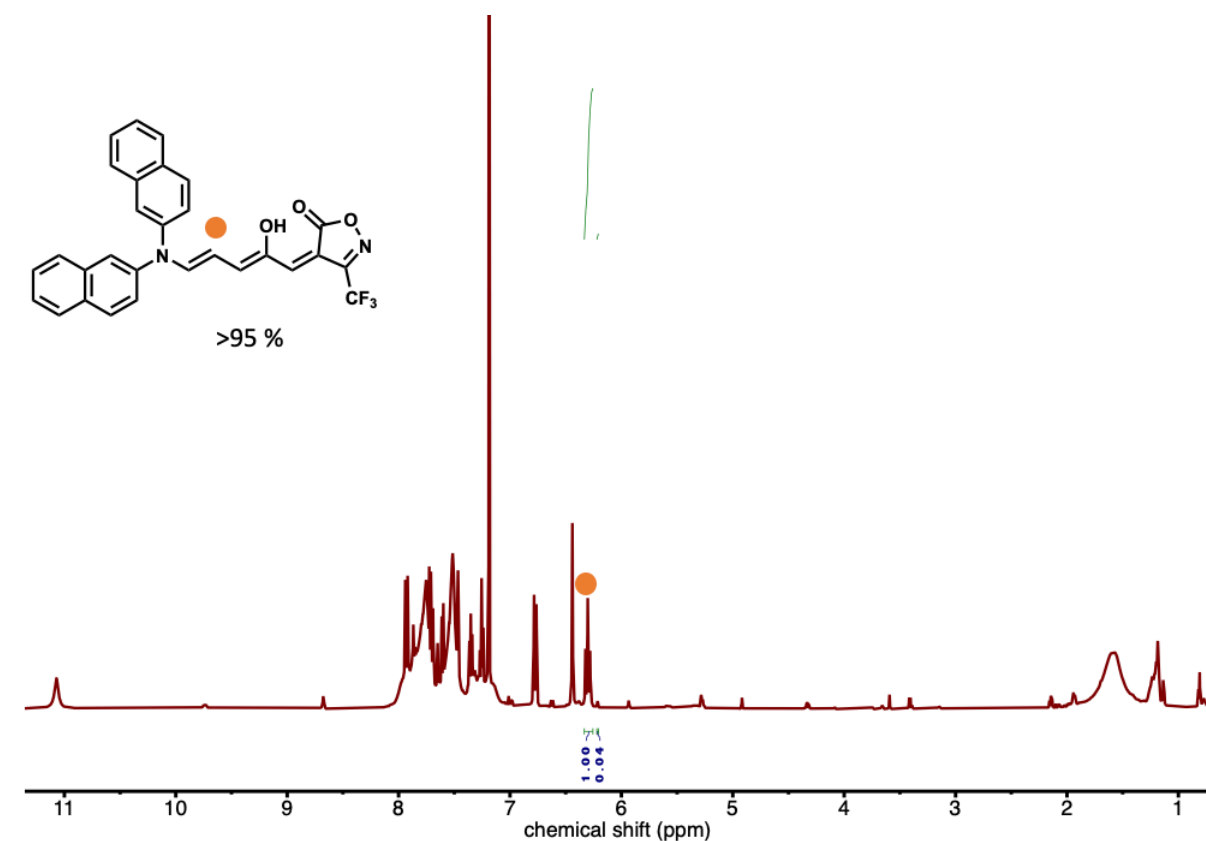

**Figure S67:**  $^1\text{H}$  NMR (600 MHz,  $\text{CDCl}_3$ ) spectra of the equilibrated DASA-9. No closed form can be observed.

## SUPPORTING INFORMATION

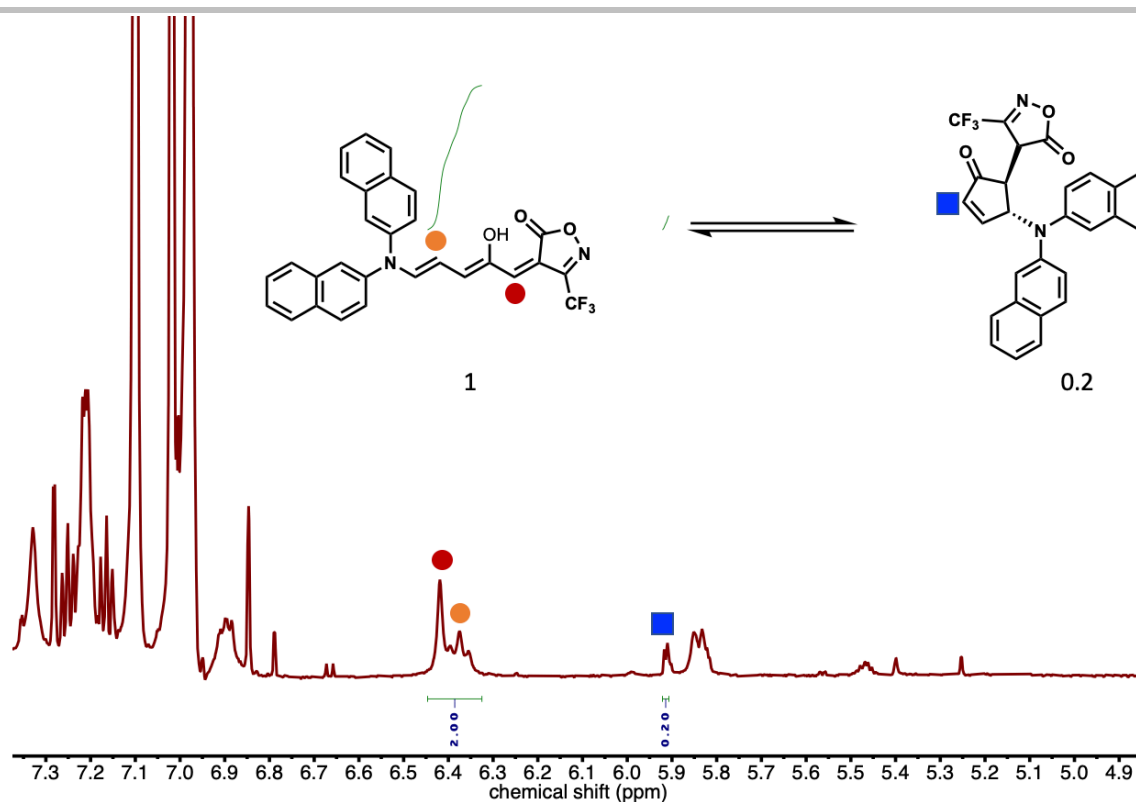

Figure S68:  $^1\text{H}$  NMR (600 MHz,  $\text{Tol-}d_6$ ) spectra of the equilibrated DASA-9.

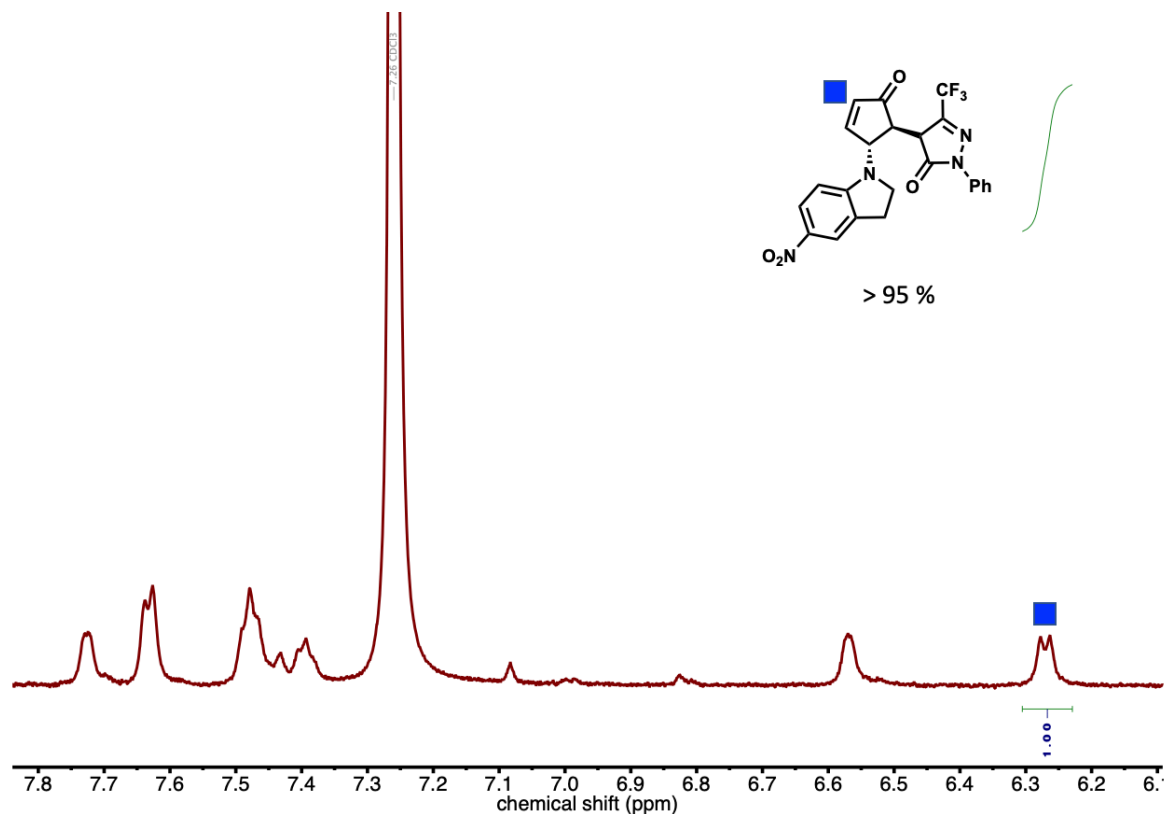

Figure S69:  $^1\text{H}$  NMR (600 MHz,  $\text{CDCl}_3$ ) spectra of the equilibrated DASA-10. No open form can be observed.

## SUPPORTING INFORMATION

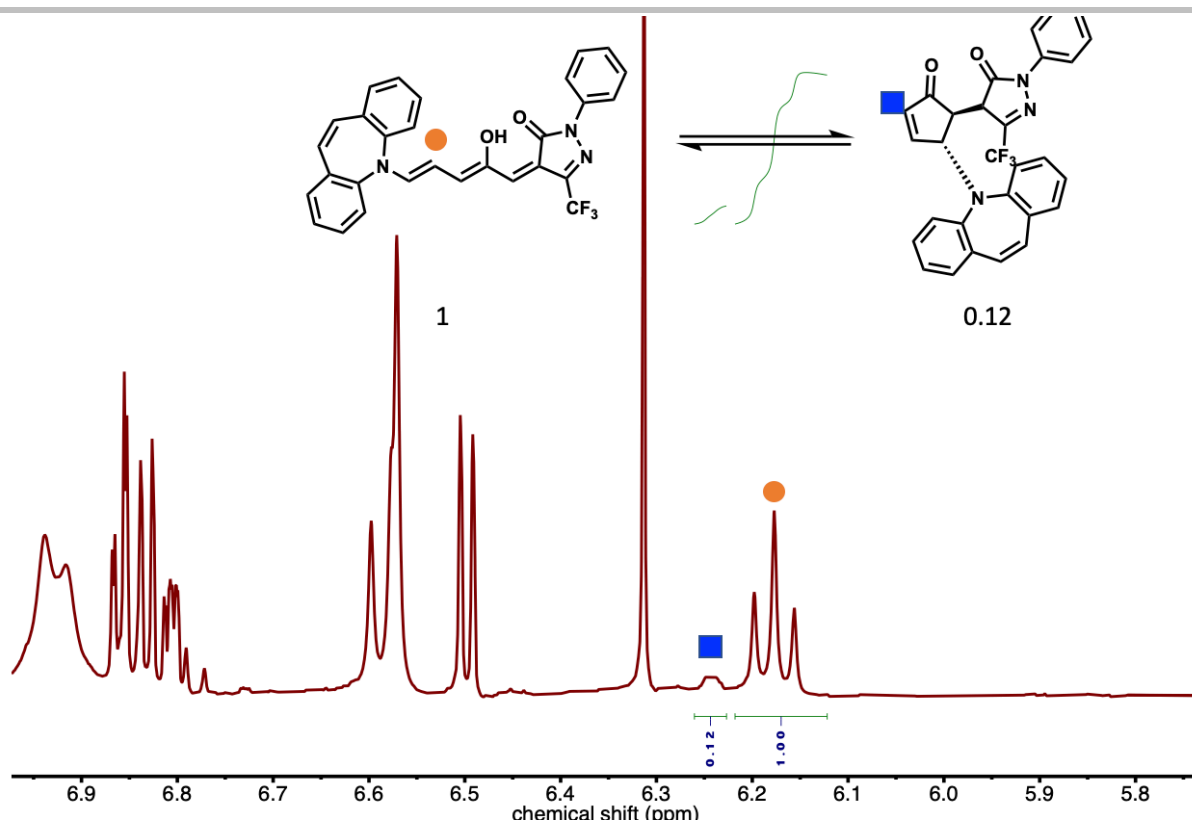

Figure S70: <sup>1</sup>H NMR (600 MHz, CDCl<sub>3</sub>) spectra of the equilibrated DASA-11.

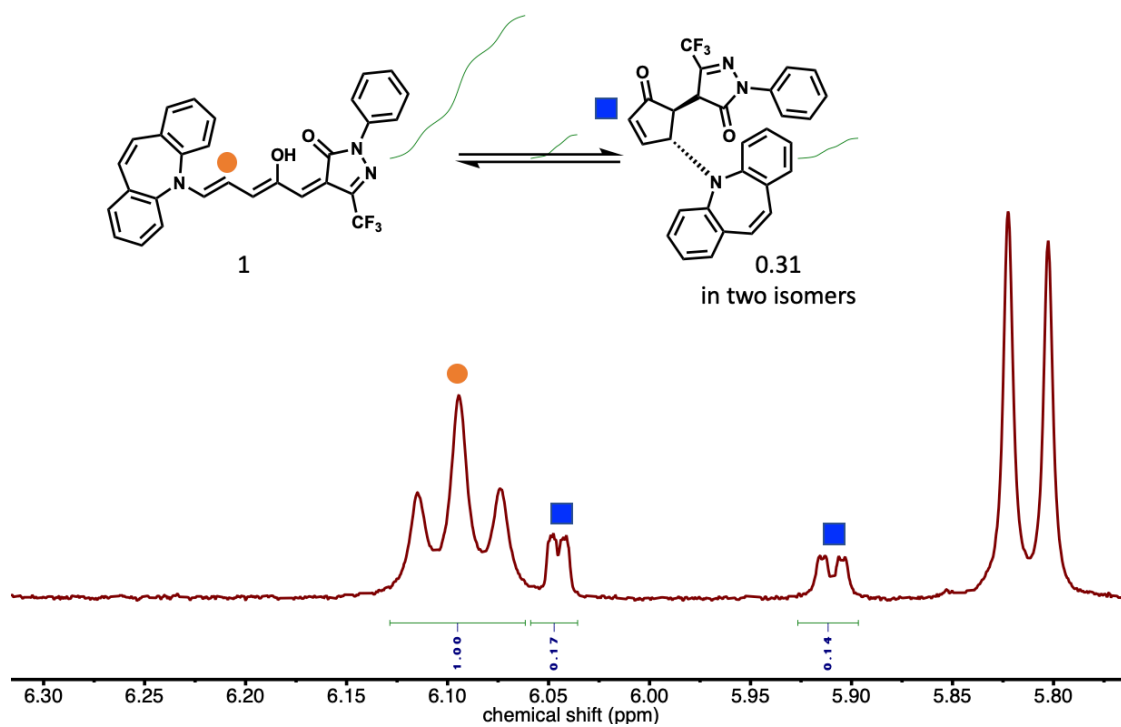

Figure S71: <sup>1</sup>H NMR (600 MHz, Tol-*d*<sub>6</sub>) spectra of the equilibrated DASA-11.

## SUPPORTING INFORMATION

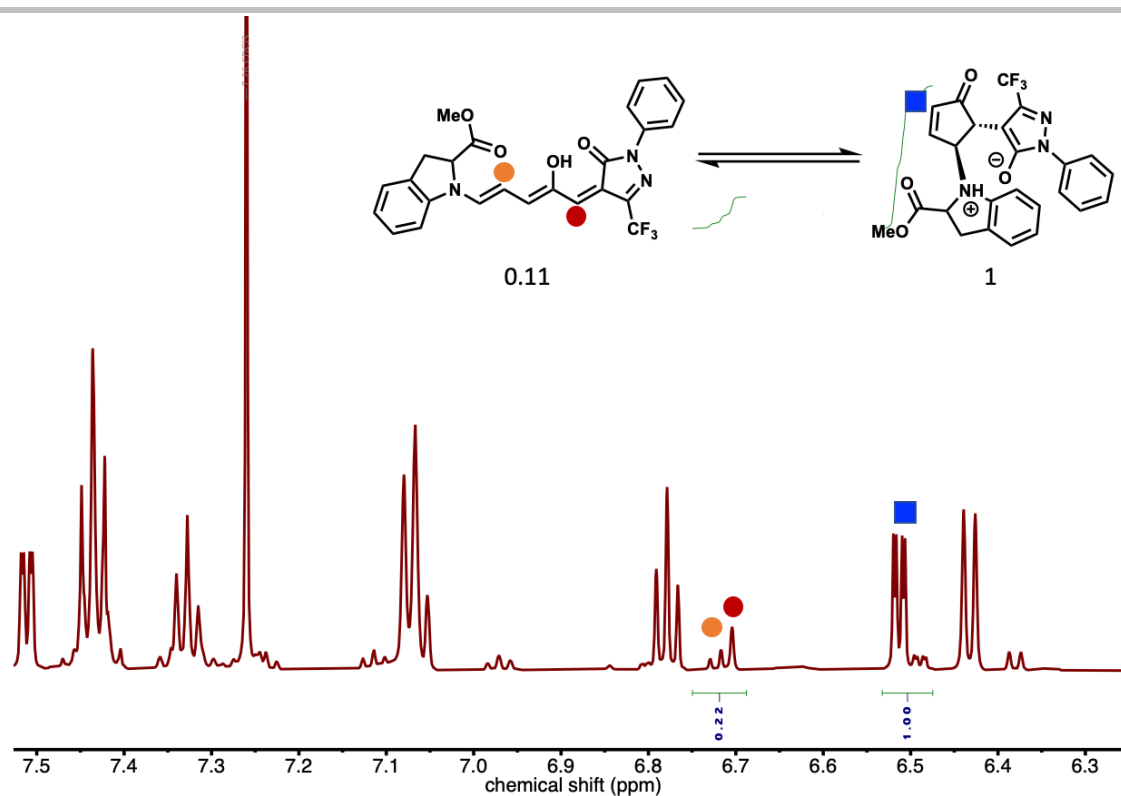

Figure S72: <sup>1</sup>H NMR (600 MHz, CDCl<sub>3</sub>) spectra of the equilibrated DASA-12.

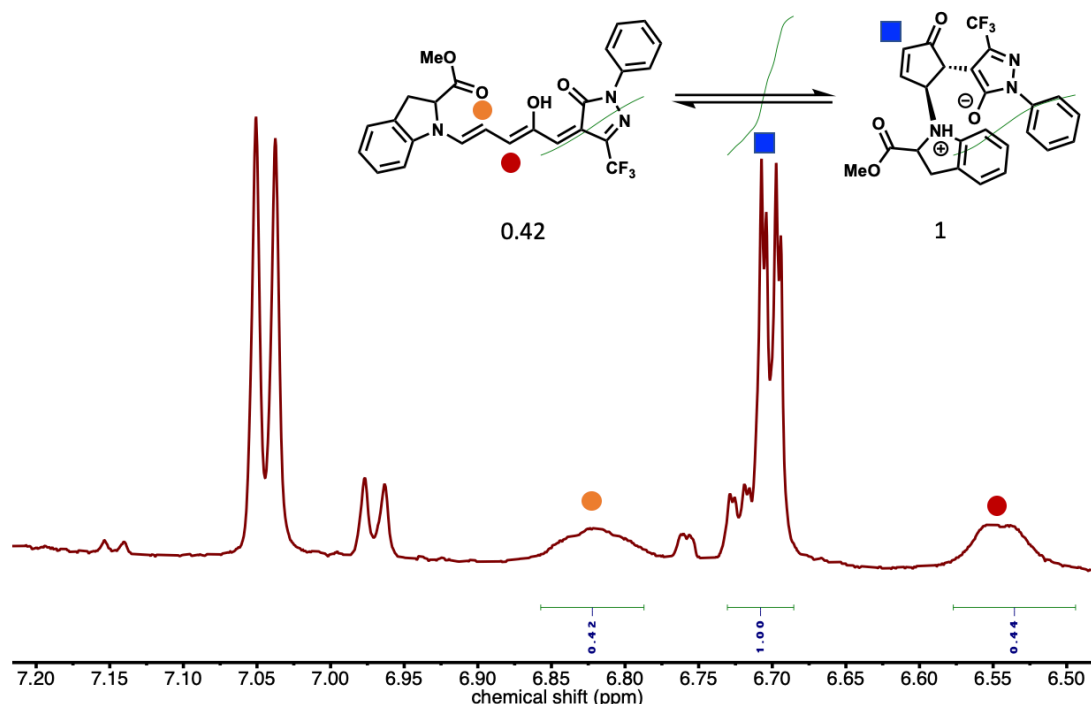

Figure S73: <sup>1</sup>H NMR (600 MHz, Tol-*d*<sub>8</sub>) spectra of the equilibrated DASA-12.

## SUPPORTING INFORMATION

## 8.4 2D-NMR Spectroscopy

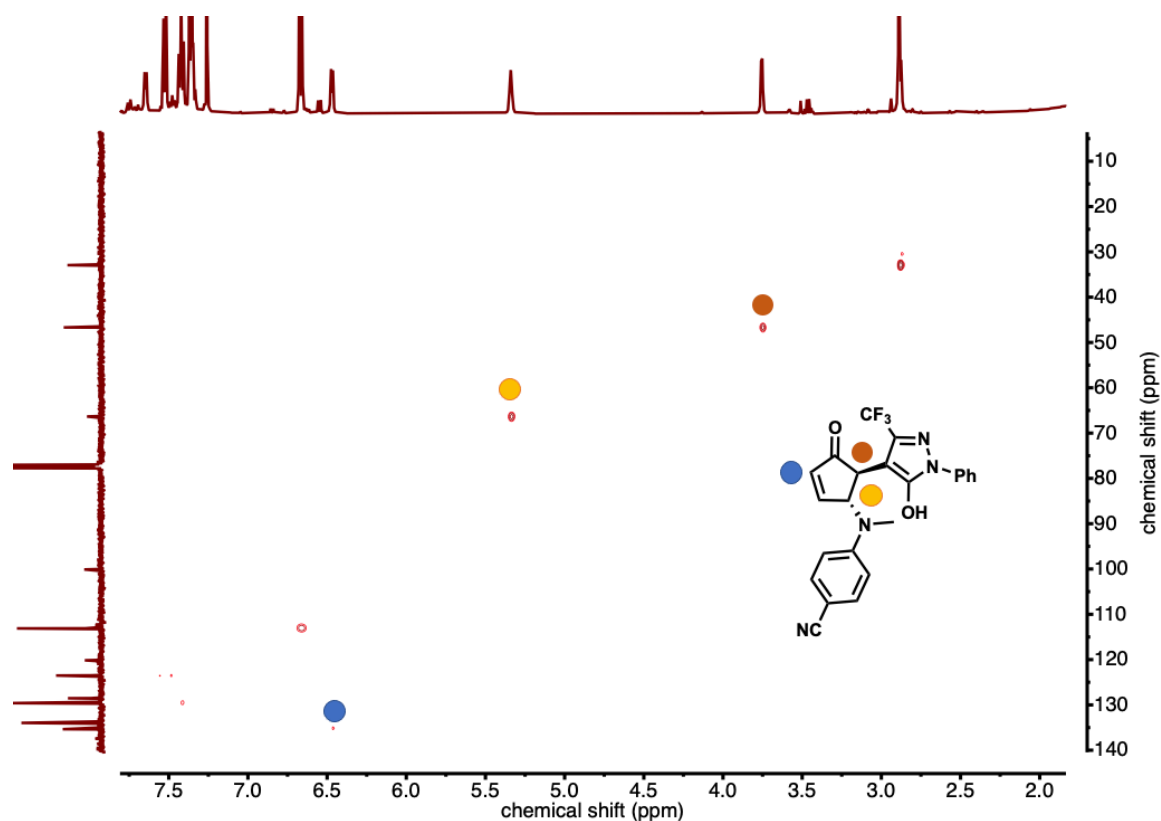

Figure S74: HSQC NMR (600 MHz, 297 K, CDCl<sub>3</sub>) spectra of DASA-8.

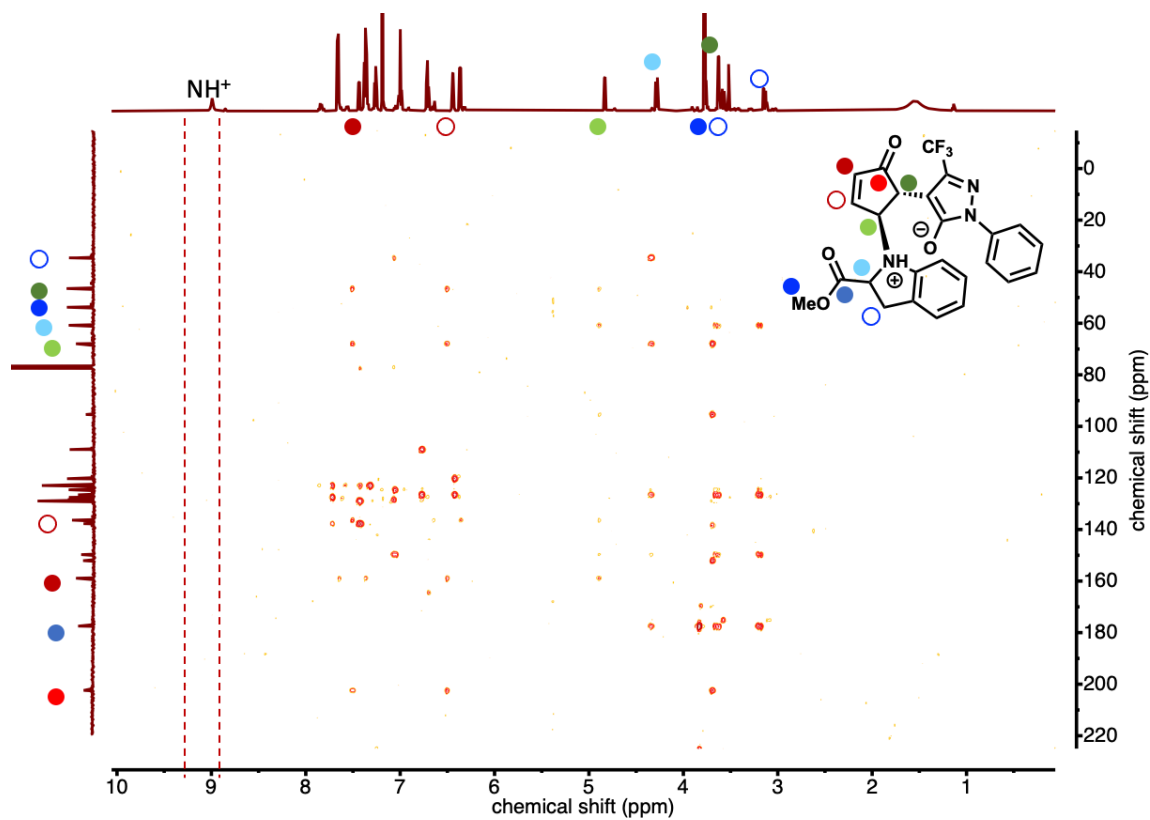

Figure S75: HMBC NMR (600 MHz, 297 K, CDCl<sub>3</sub>) spectra of DASA-12.

## SUPPORTING INFORMATION

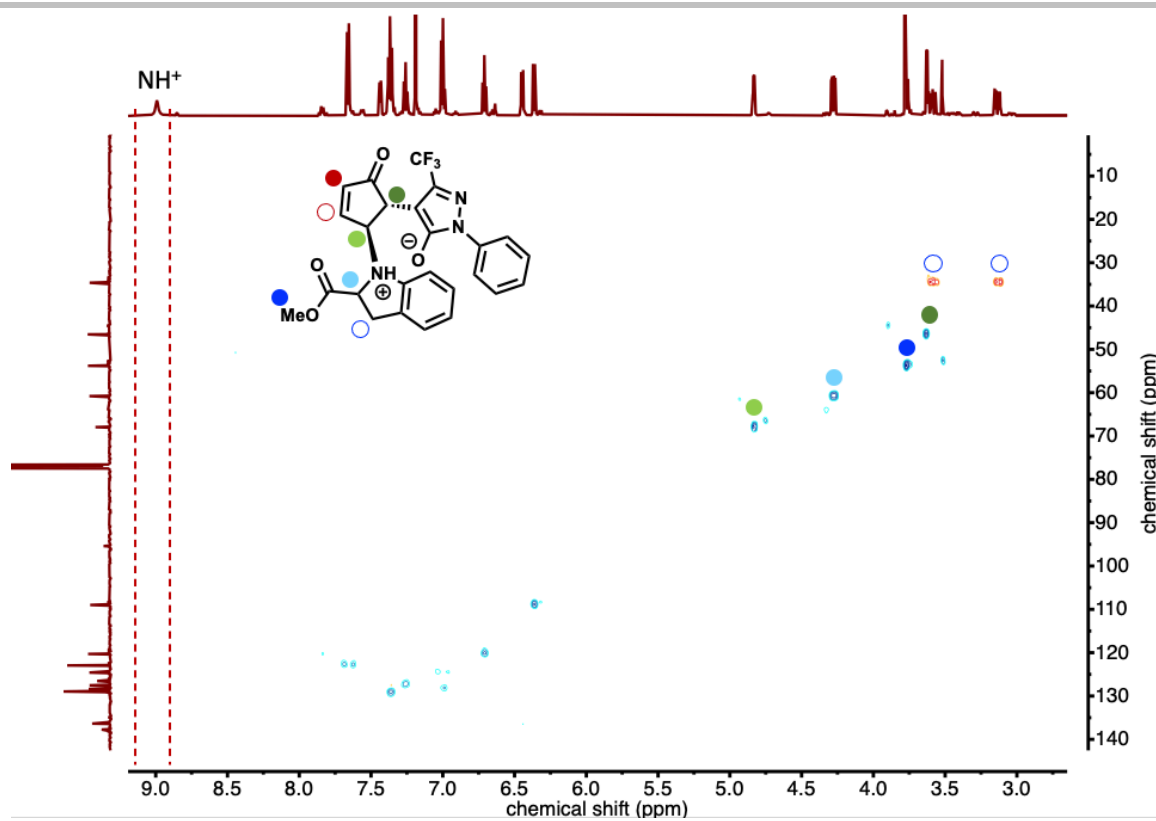

Figure S76: HSQC NMR (600 MHz, 297 K, CDCl<sub>3</sub>) spectra of DASA-12.



## SUPPORTING INFORMATION

**9. Fluorescence**

For DASA-9 in toluene (in contrast to the parent 2,2'-dinaphthylamine) we found a dependence of the emission spectrum on the excitation wavelength (**Figure S77**). This suggests the existence of multiple electronic transitions being involved, which can be explained by the existence of different fluorescent species in the ground state (i.e. open/closed form DASA and/or conformers thereof and/or minor amounts of residual free amine and/or conformers thereof). In general, the emission spectra of DASA-9 are slightly red-shifted when compared to the parent dinaphthylamine in toluene ( $\lambda_{\text{max}}$  of 396 nm vs. 388 nm). For dinaphthylamine in toluene we did not observe any visible-light dependence on the fluorescent properties, while for DASA-9 we observed an increase in intensity, but no change in band shape or position, when repeatedly irradiated with a MINTF4 fiber-coupled LED (Thorlabs, nominal wavelength 554 nm) for ~60 seconds (10  $\mu\text{M}$  in toluene, **Figure S78**). Control measurements of dinaphthylamine (0.1  $\mu\text{M}$ ) in a toluene solution of DASA-2 (20  $\mu\text{M}$ ), however, did show some degree of excitation wavelength dependent emission spectra and trials with visible light irradiation were inconclusive (**Figure S79**). We can therefore not exclude that trace amounts of free dinaphthylamine are causing or interfering with the measured fluorescence response. We additionally found that a toluene solution of DASA-9 when constantly irradiated with 350 nm light shows irreversible increase in fluorescence emission after some time suggesting possible photodegradation (no such changes were found for dinaphthylamine in toluene in the investigated time window, **Figure S79**). As described elsewhere,<sup>[15]</sup> open form DASAs exhibit weak fluorescence emission when excited at their maximum absorption wavelength ( $\pi\text{-}\pi^*$  transition). We also observed fluorescence in DASA-9 upon excitation at 630 nm but similarly weak in intensity as observed previously for other DASA derivatives employing simpler amine donors. The intensity of this fluorescence band decreases upon converting the DASA to the closed form isomer and increases again upon thermal recovery in the dark (**Figure S78**).

## SUPPORTING INFORMATION

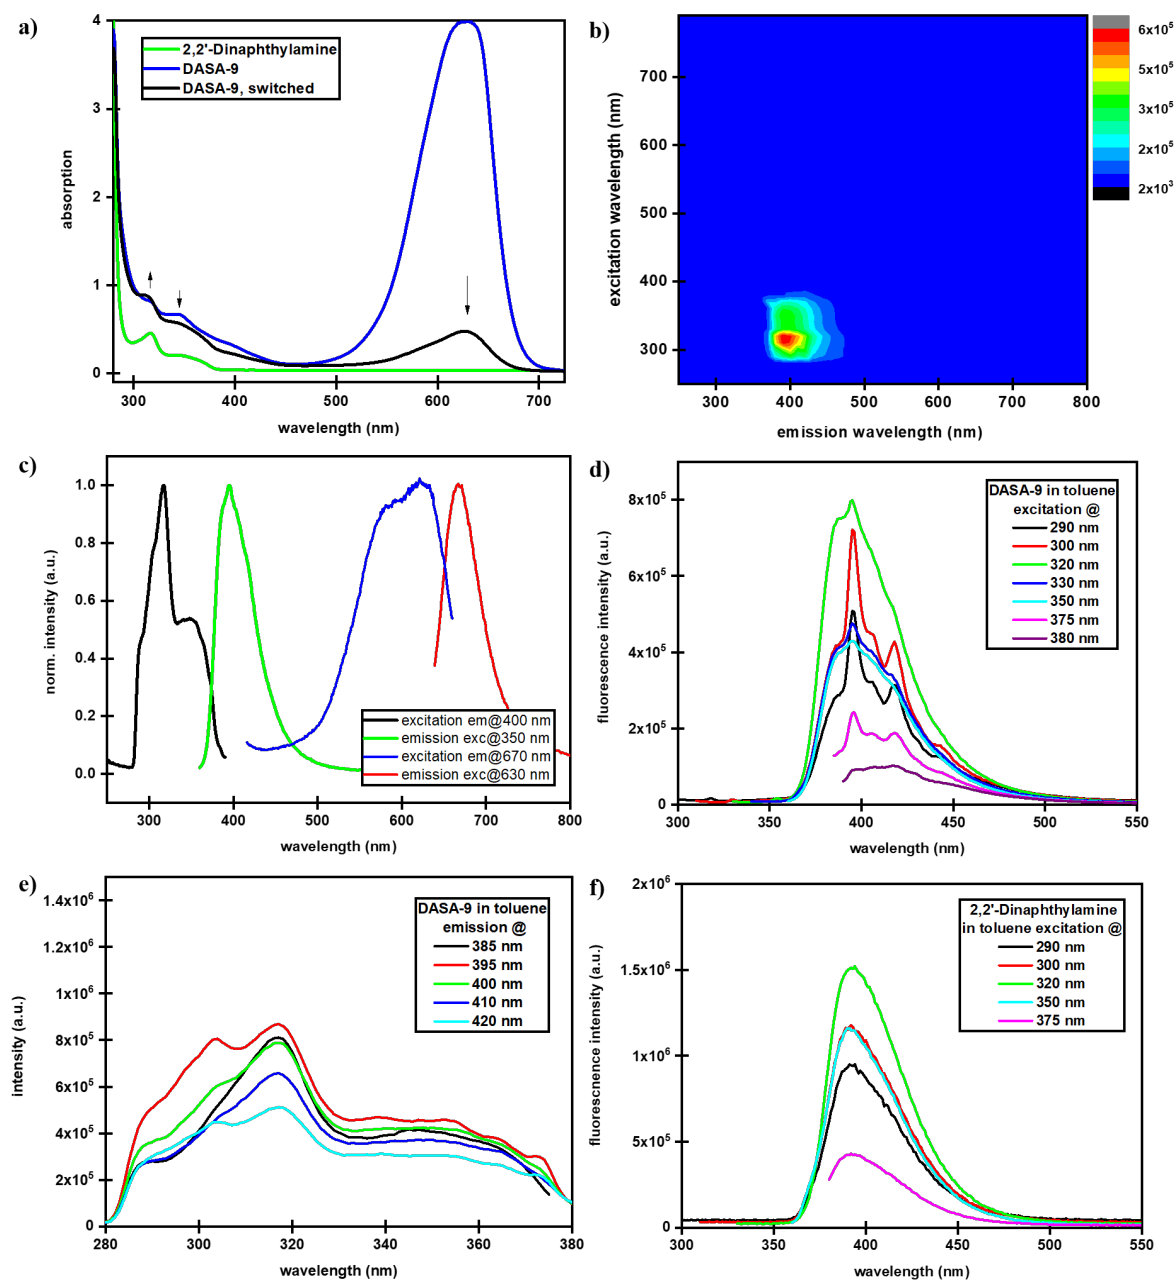

**Figure S77.** Absorption, emission and excitation spectra of DASA-9 (equilibrated solution in toluene) and 2,2'-dinaphthylamine in toluene. a) Absorption spectra showing the absorbance bands characteristic for the naphthyl-units at 325–350 nm (2,2'-dinaphthylamine, 20  $\mu\text{M}$ ; DASA-9, 100  $\mu\text{M}$ , before and after visible light irradiation for  $\sim 100$  s). b) Excitation vs emission spectrum of an equilibrated solution of DASA-9 in toluene (10  $\mu\text{M}$ ). c) Normalized excitation and emission spectra:  $\lambda_{\text{em}} = 400$  nm/  $\lambda_{\text{exc}} = 350$  nm (2 nm slit widths) and  $\lambda_{\text{em}} = 670$  nm/  $\lambda_{\text{exc}} = 630$  nm (5 nm slit widths). d) Emission spectra of DASA-9 in toluene (10  $\mu\text{M}$ ) for different excitation wavelengths. e) Excitation spectra of DASA-9 in toluene (10  $\mu\text{M}$ ) for different emission wavelengths. f) Emission spectra of 2,2'-dinaphthylamine in toluene (20  $\mu\text{M}$ ) for different excitation wavelengths (1 nm slit widths).

## SUPPORTING INFORMATION

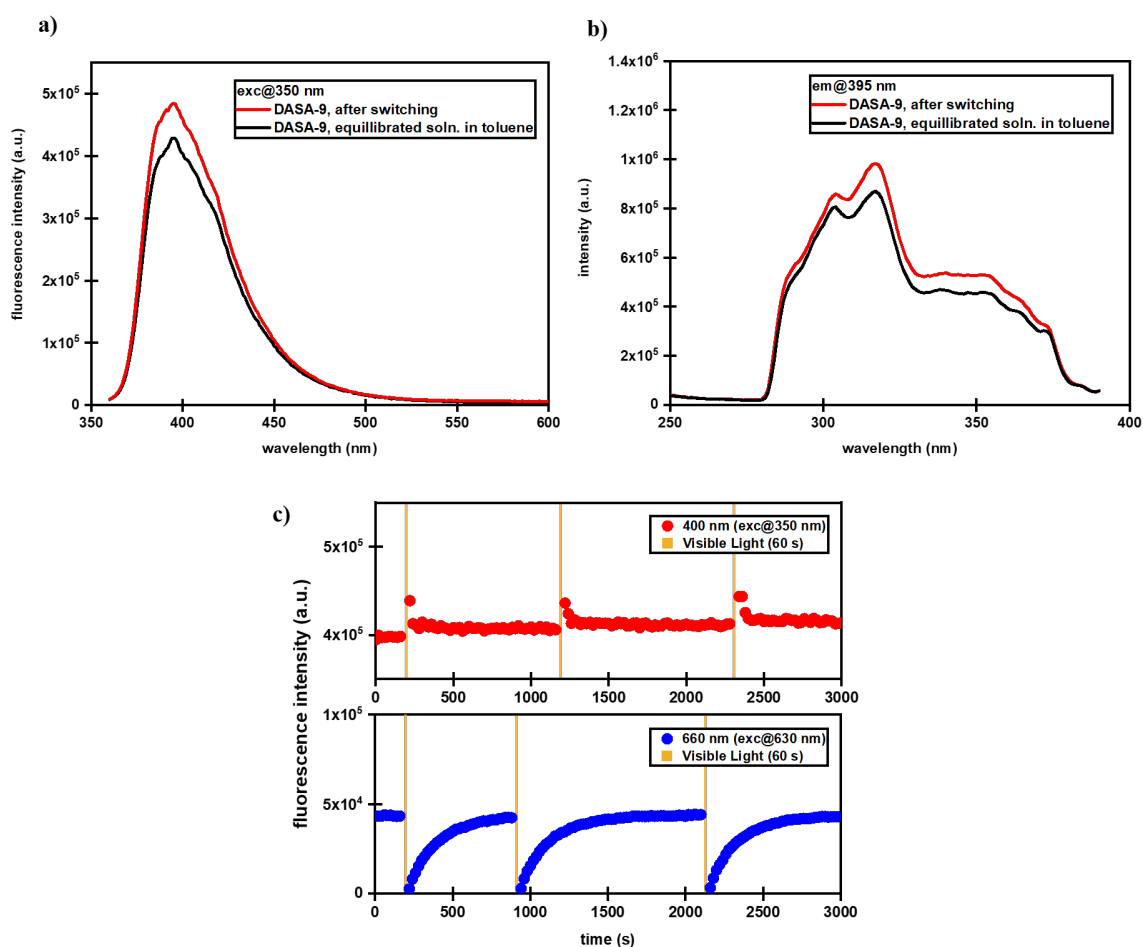

**Figure S78:** Changes in emission and excitation spectra of DASA-9 (10  $\mu$ M, toluene). a) Emission spectra ( $\lambda_{exc} = 350$  nm) before and after visible light irradiation (MINTF4 fiber-coupled LED, Thorlabs, nominal wavelength 554 nm) for ~60 seconds. b) Excitation spectra ( $\lambda_{em} = 395$  nm) before and after visible light irradiation. c) Fluorescence intensity monitoring at 400 nm ( $\lambda_{exc} = 350$  nm, 2 nm slit widths) and 660 nm ( $\lambda_{exc} = 630$  nm, 5 nm slit widths) before and after visible light irradiation (MINTF4 fiber-coupled LED, Thorlabs, nominal wavelength 554 nm for ~60 seconds inside fluorimeter, temperature: 31  $^{\circ}$ C).

## SUPPORTING INFORMATION

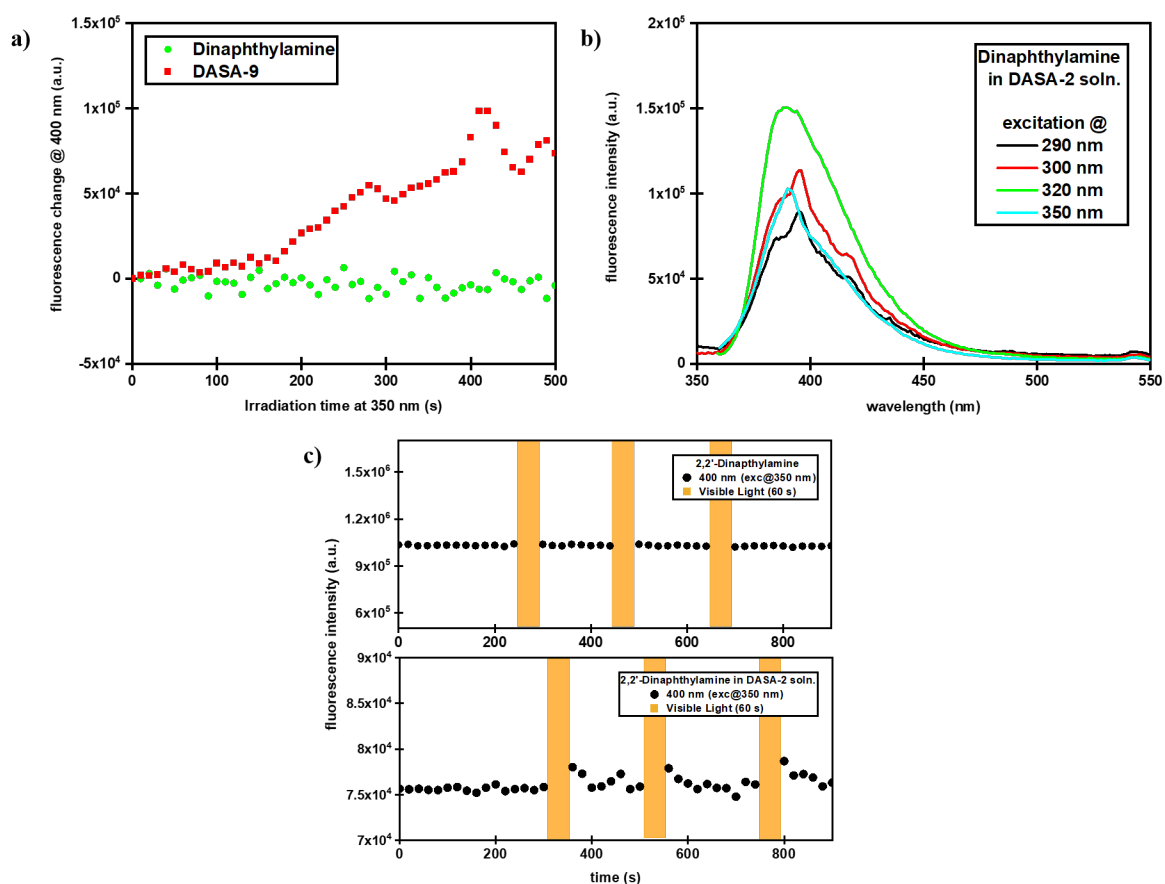

**Figure S79:** Control experiments for luminescence of DASA-9. a) Fluorescence intensity change at 400 nm ( $\lambda_{\text{exc}} = 350$ ) upon constant irradiation at 350 nm (excitation light source of fluorimeter) for solutions of dinaphthylamine (20  $\mu\text{M}$  in toluene) and DASA-9 (10  $\mu\text{M}$  in toluene). b) Emission spectra at different excitation wavelengths of dinaphthylamine (0.1  $\mu\text{M}$ ) in a solution of DASA-2 in toluene (20  $\mu\text{M}$ ). Slit widths set to 3 nm. c) Fluorescence intensity monitoring at 400 nm ( $\lambda_{\text{exc}} = 350$  nm) before and after visible light irradiation (MINTF4 fiber-coupled LED, Thorlabs, nominal wavelength 554 nm for ~60 seconds inside fluorimeter, temperature: 31  $^{\circ}\text{C}$ ) of dinaphthylamine in toluene (20  $\mu\text{M}$ ) or in a toluene solution (0.1  $\mu\text{M}$ ) of DASA-2 (20  $\mu\text{M}$ ).

## SUPPORTING INFORMATION

## 10. Probing the H-bonding in the Presence of HFIP

As confirmed in previous studies by other groups,<sup>[10]</sup> the hydroxy protons in DASAs are easily exchangeable and their <sup>1</sup>H-NMR signals are completely absent when the spectra are measured in, e.g., deuterated alcohols. We also observed the disappearance of these signals when measuring <sup>1</sup>H-NMR spectra of DASAs in solutions containing larger amounts of HFIP (deuterated and non-deuterated). In the following **Figure S80**, the changes of the hydroxy proton <sup>1</sup>H-NMR signal under different conditions are displayed. Here, it is visible that HFIP leads to a disappearance of the hydroxy proton signal, whereas additives such as HFIPMe at similar concentrations have none (or less, only slight broadening is observed) of an effect.

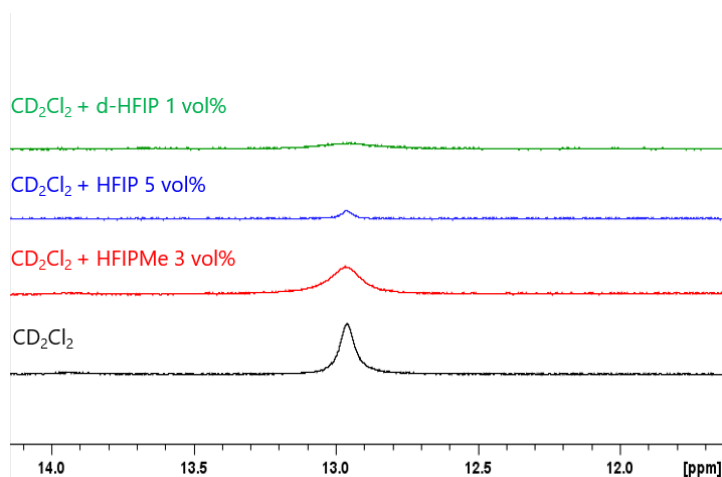

**Figure S80:** <sup>1</sup>H NMR (500 MHz, CD<sub>2</sub>Cl<sub>2</sub>) spectra of DASA-2 upon addition of different additives. The signal of hydroxy proton on the triene is shown.

As also shown in **Figure S81**, the presence of HFIP, however, seems to not effect a change of the chemical shift of the OH-signal. On the other hand, the chemical shifts of the polyene and aromatic protons do change, which we believe can also be a result of simple solvent effects and not necessarily specific interactions (it is also established that different solvents favor different resonance structures of the DASA open form).

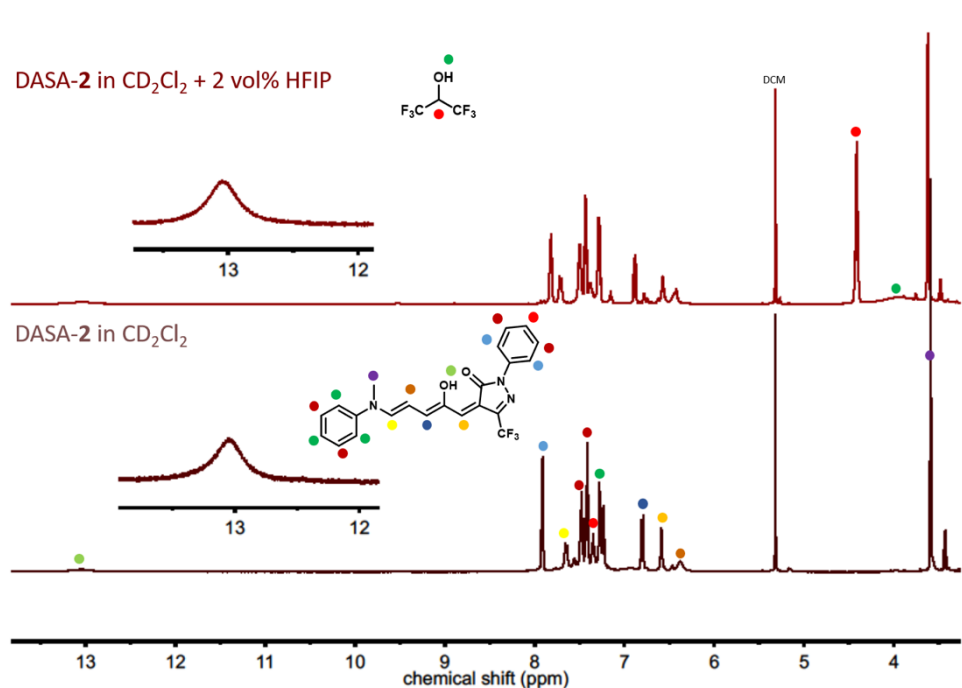

**Figure S81:** <sup>1</sup>H NMR (500 MHz) spectra of DASA-2 (10 mg/mL) in CD<sub>2</sub>Cl<sub>2</sub> and CD<sub>2</sub>Cl<sub>2</sub> containing 2 vol% HFIP.

## SUPPORTING INFORMATION

To further probe the potential of H-bonding, IR spectroscopic measurements in DCM vs. HFIP on a Meldrum's acid based DASA (DASA-6) were conducted. As indicated in **Figure S82** below, the observation of two bands for the carbonyl stretching modes in the Meldrum's acid moiety can be found for measurements in DCM or in the solid state ( $\sim 1615\text{ cm}^{-1}$ : H-bonded ring carbonyl stretch,  $\sim 1700\text{ cm}^{-1}$  second non H-bonded carbonyl, in agreement with previous assignments from literature).<sup>[10]</sup> On the other hand, measurements in HFIP did not show a pronounced band at  $1700\text{ cm}^{-1}$  for a non H-bonded carbonyl and the band previously observed at  $\sim 1615\text{ cm}^{-1}$  red-shifts pointing towards a large change in the strength of the H-bond. Although further studies are required, this does provide additional supporting evidence for the proposed modulation of the H-bonding.

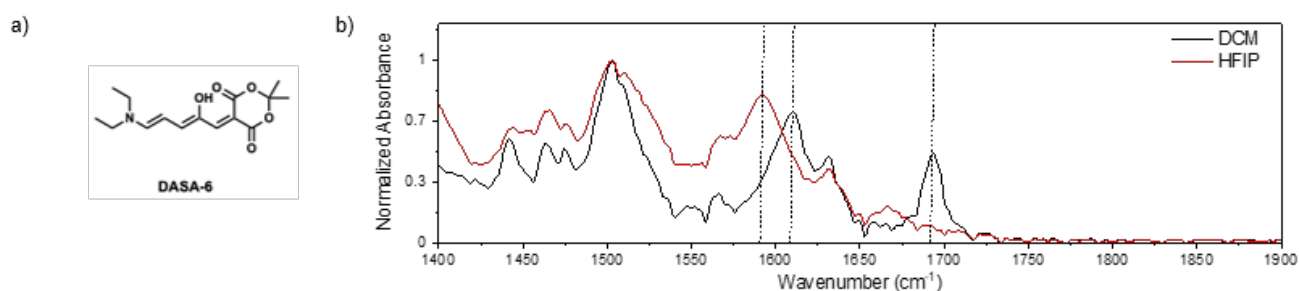

**Figure S82:** a) DASA-6. b) IR spectra of DASA-6 in DCM and HFIP showing the spectral changes in carbonyl region.

## 11. Spectra

## 11.1 NMR Spectra

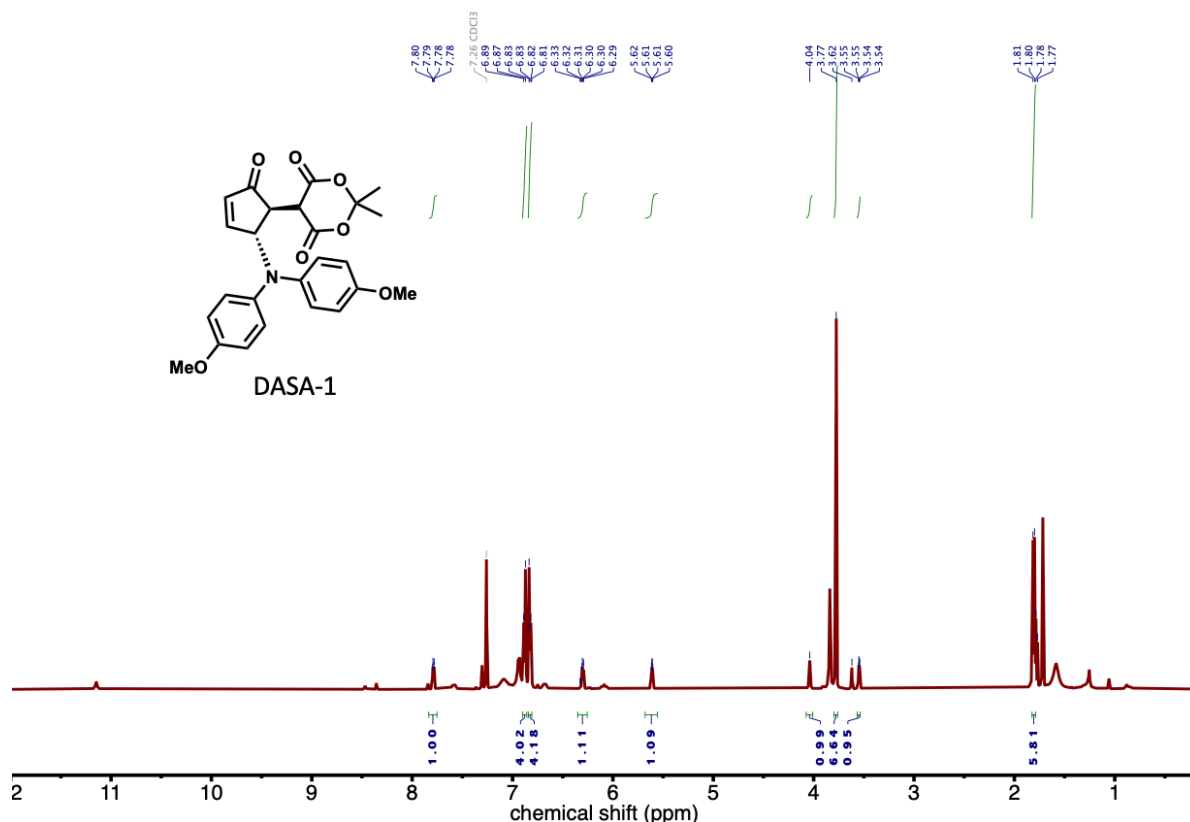

**Figure S83:**  $^1\text{H}$  NMR (500 MHz,  $\text{CDCl}_3$ ) spectra of the closed isomer of DASA-1. Some open form can also be observed.

## SUPPORTING INFORMATION

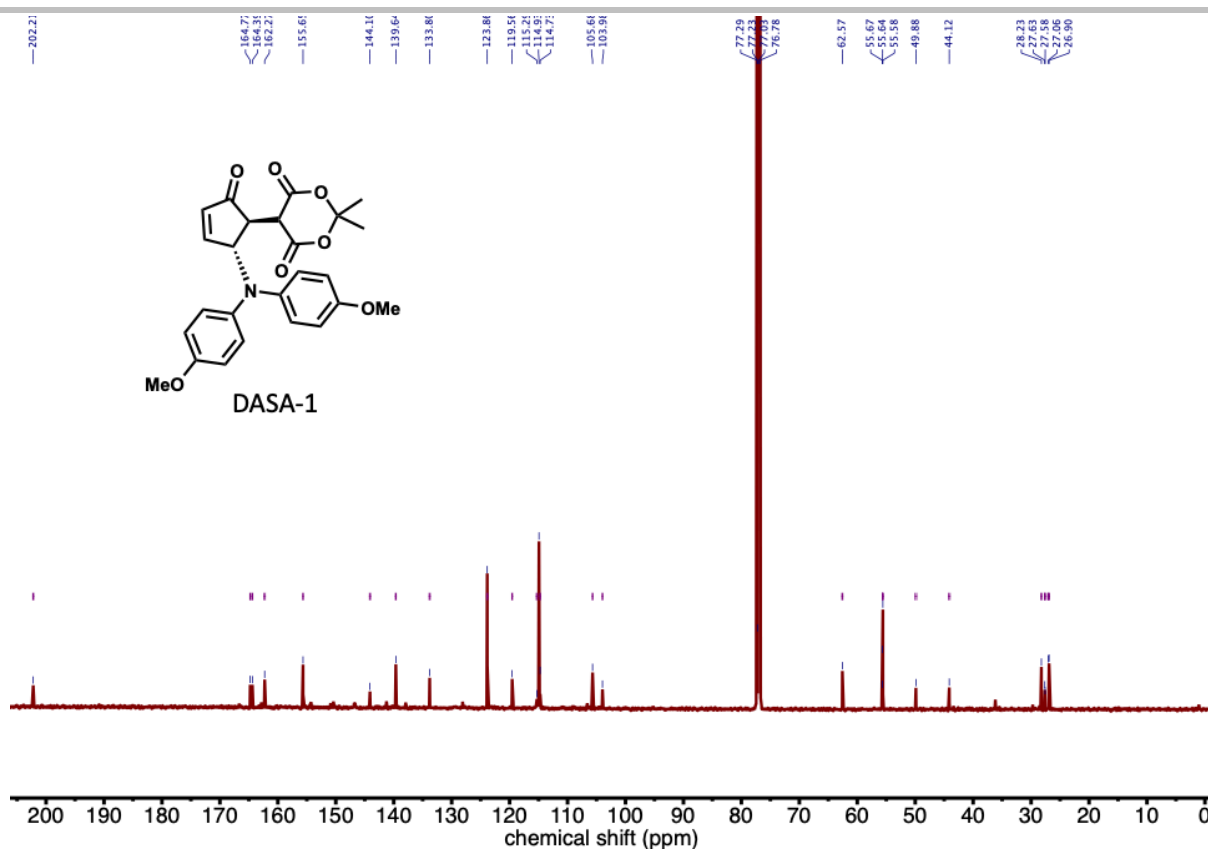

Figure S84: <sup>13</sup>C NMR (125 MHz, CDCl<sub>3</sub>) spectra of the closed isomer of DASA-1.

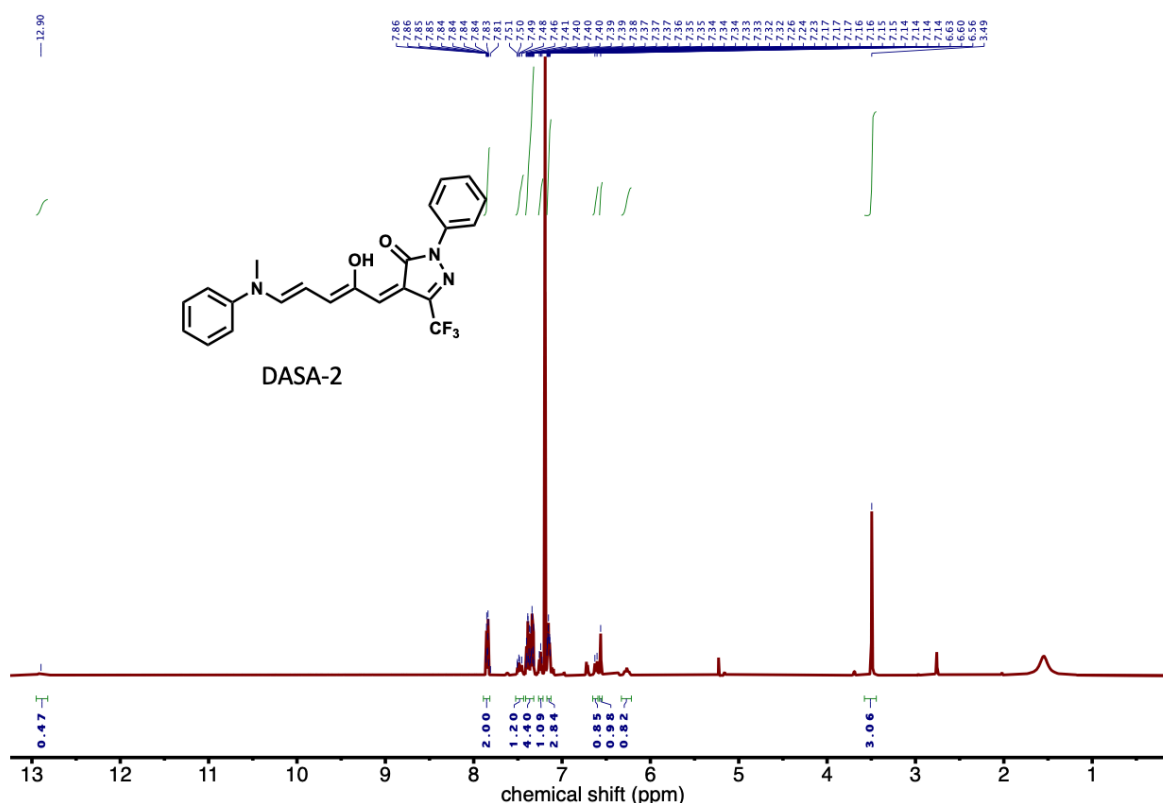

Figure S85: <sup>1</sup>H NMR (500 MHz, CDCl<sub>3</sub>) spectra of the open isomer of DASA-2. Some closed form can also be observed.





## SUPPORTING INFORMATION

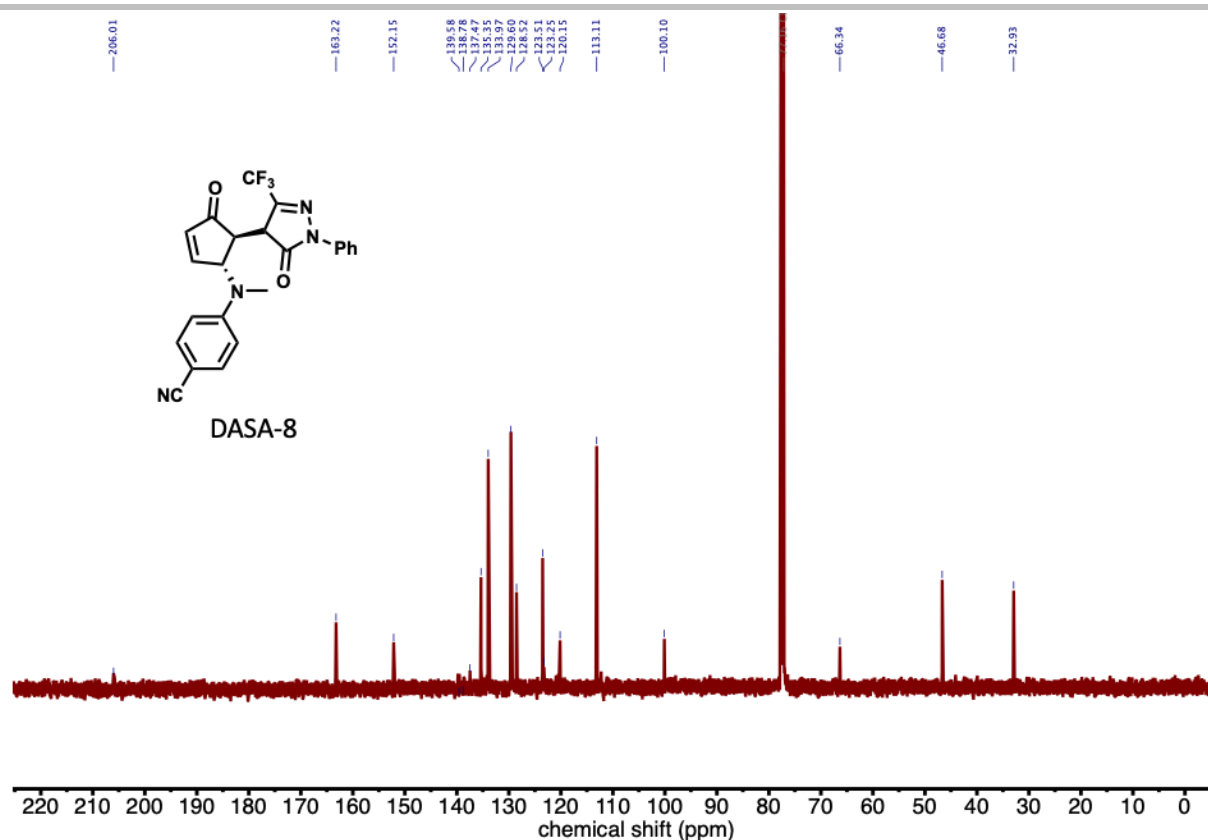

Figure S88: <sup>1</sup>H NMR (125 MHz, CDCl<sub>3</sub>) spectra of the closed isomer of DASA-8.

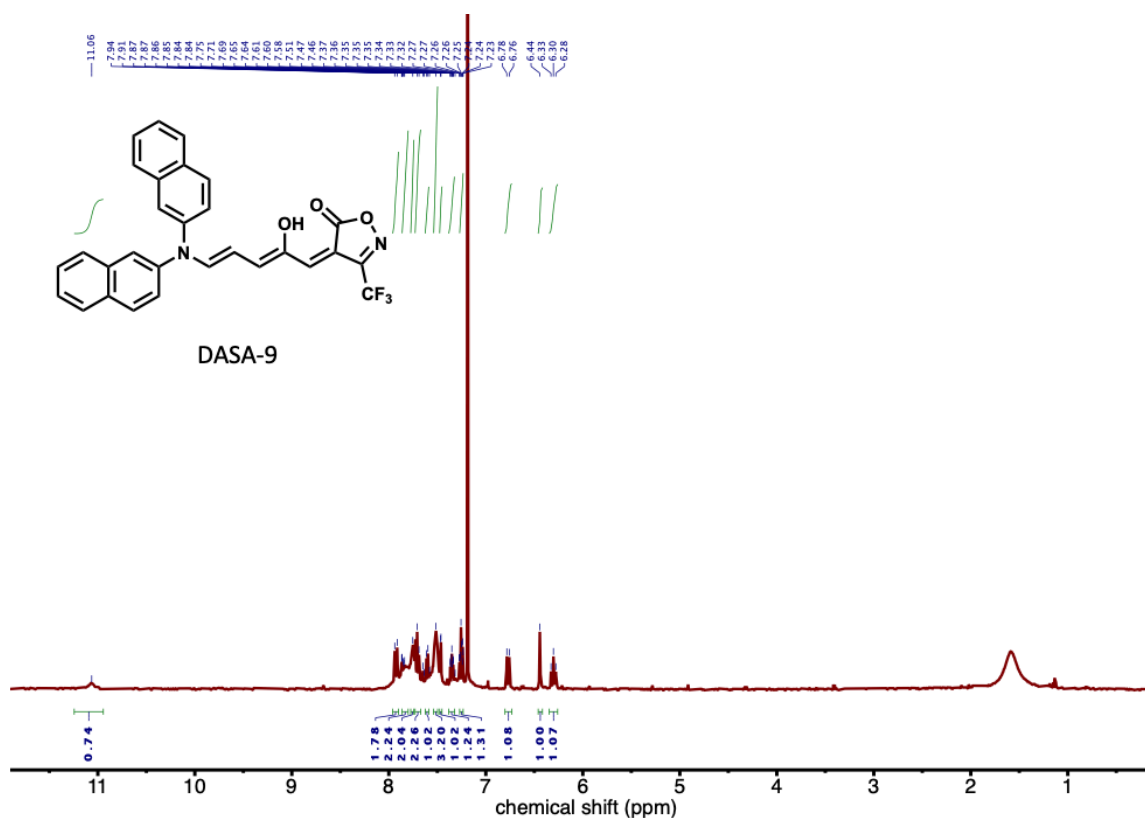

Figure S89: <sup>1</sup>H NMR (500 MHz, CDCl<sub>3</sub>) spectra of the open isomer of DASA-9.

## SUPPORTING INFORMATION

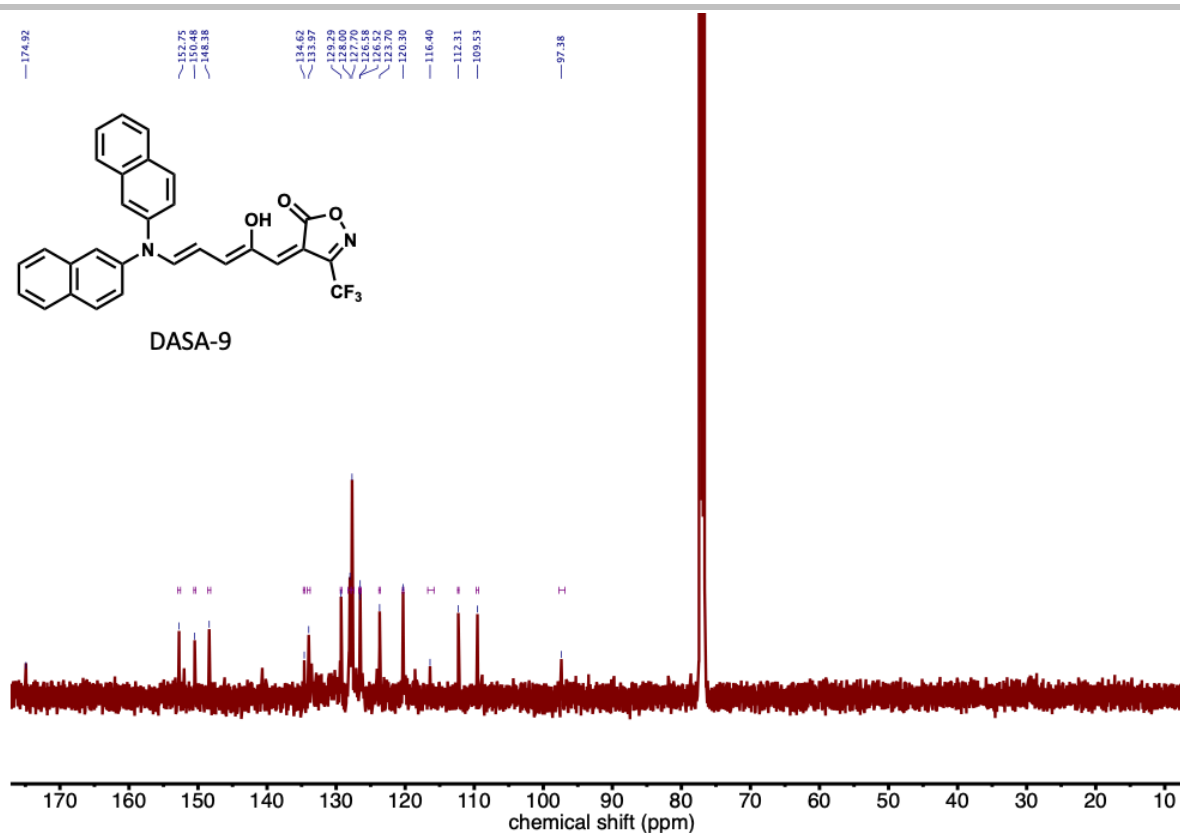

Figure S90:  $^{13}\text{C}$  NMR (125 MHz,  $\text{CDCl}_3$ ) spectra of the open isomer of DASA-9.

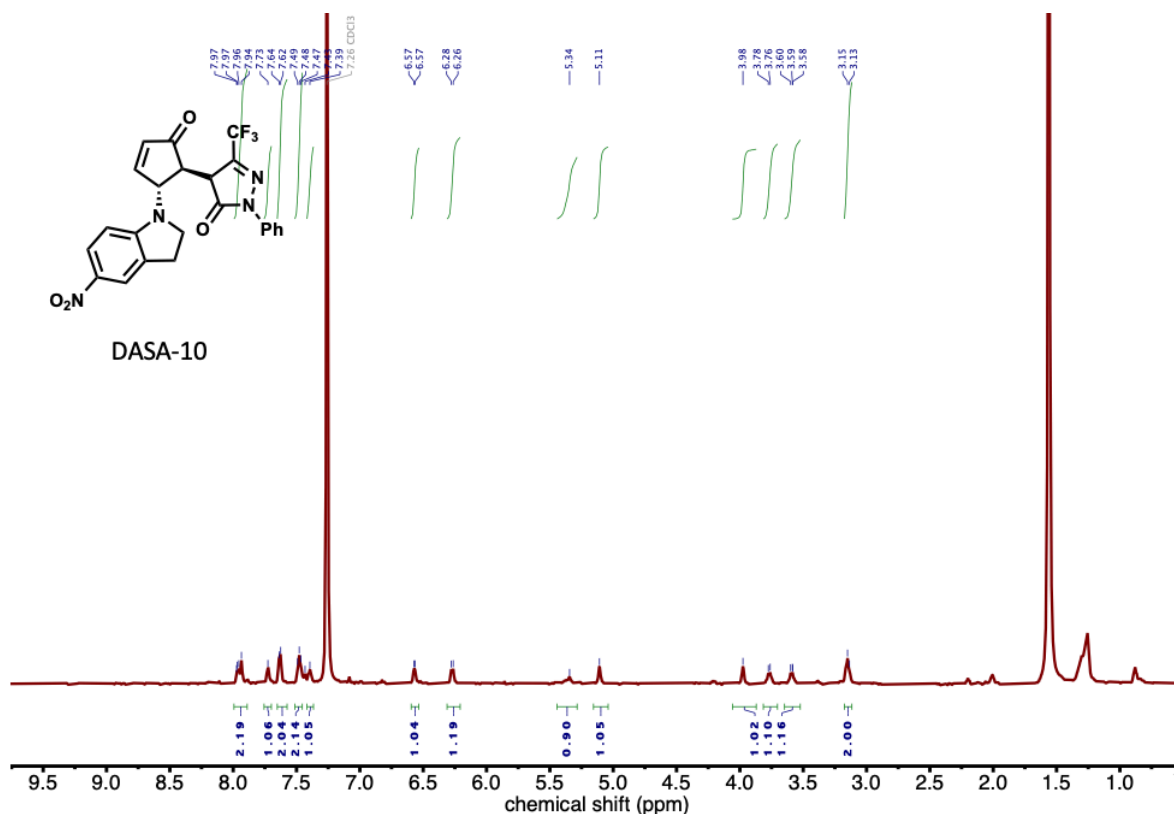

Figure S91:  $^1\text{H}$  NMR (600 MHz,  $\text{CDCl}_3$ ) spectra of the closed isomer of DASA-10.

## SUPPORTING INFORMATION

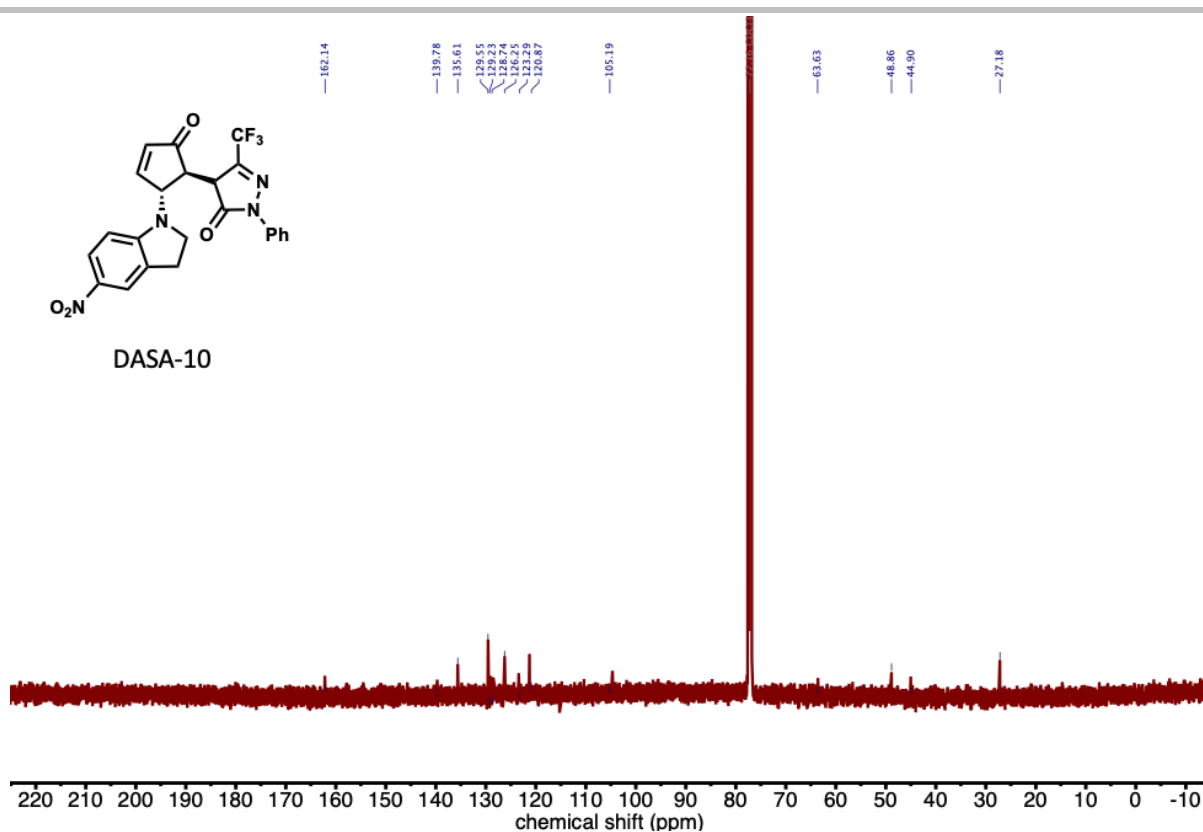

Figure S92:  $^{13}\text{C}$  NMR (125 MHz,  $\text{CDCl}_3$ ) spectra of the open isomer of DASA-10. Limited solubility of the compound.

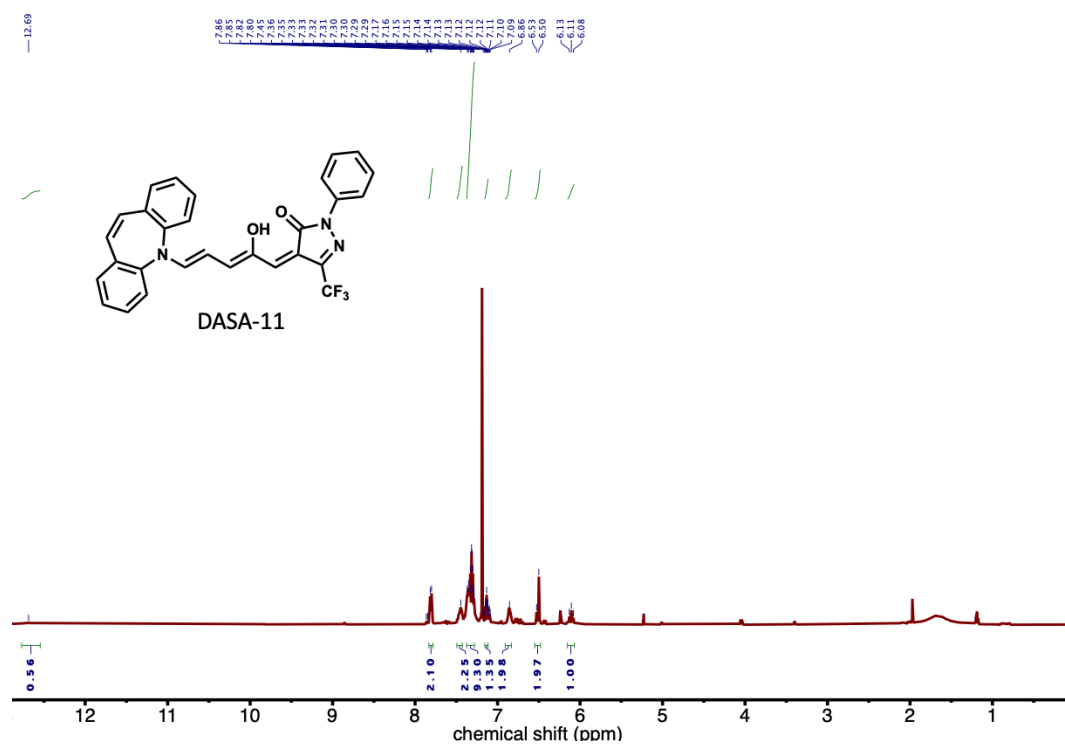

Figure S93:  $^1\text{H}$  NMR (500 MHz,  $\text{CDCl}_3$ ) spectra of the open isomer of DASA-11. Small amounts of closed isomer are also visible.

## SUPPORTING INFORMATION

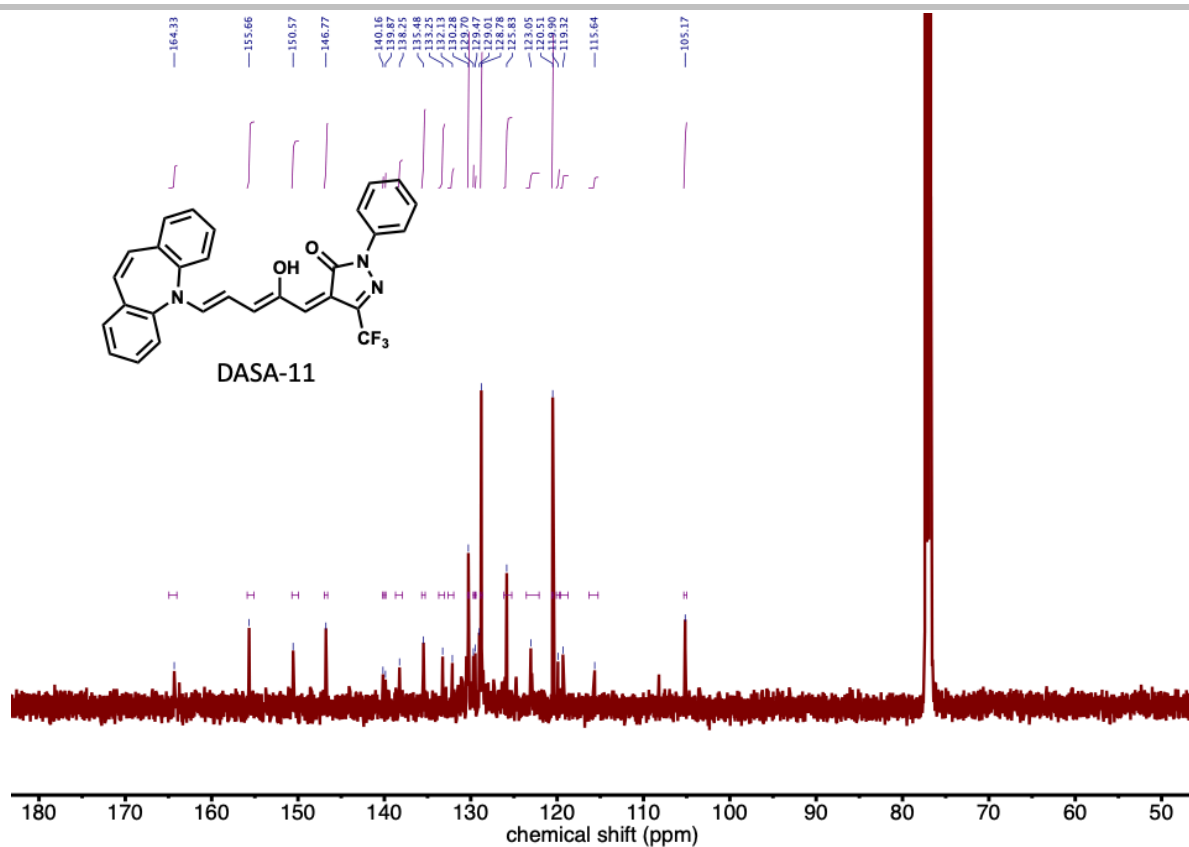

Figure S94:  $^{13}\text{C}$  NMR (125 MHz,  $\text{CDCl}_3$ ) spectra of the open isomer of DASA-11.

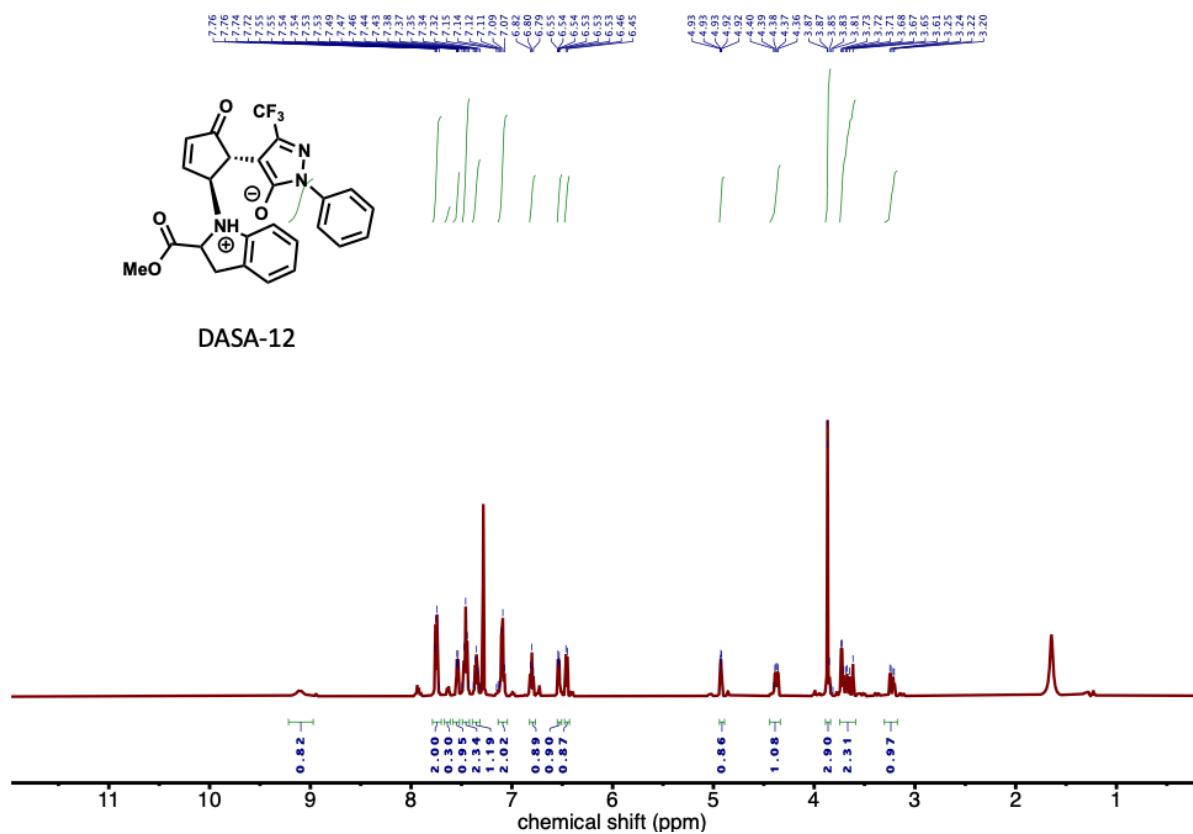

Figure S95:  $^1\text{H}$  NMR (500 MHz,  $\text{CDCl}_3$ ) spectra of the closed isomer of DASA-12. Small amounts of open form are also visible.

## SUPPORTING INFORMATION

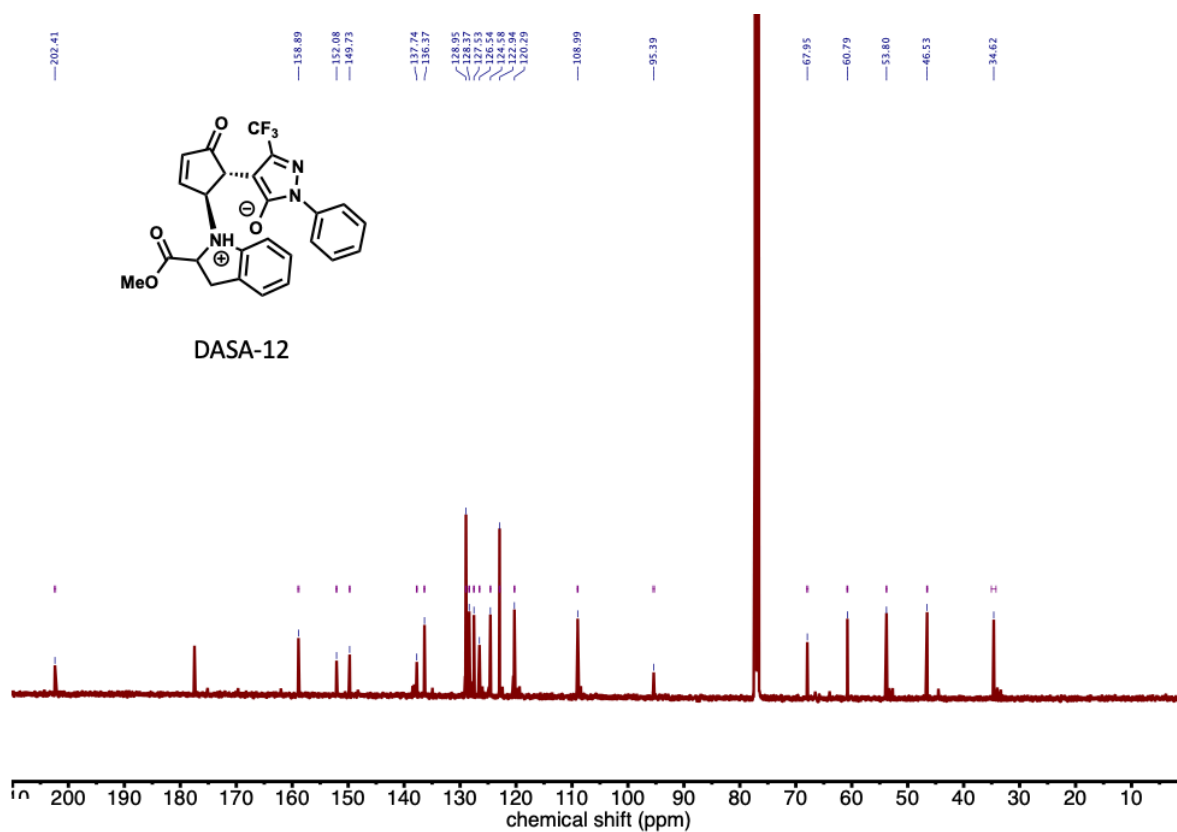

Figure S96:  $^{13}\text{C}$  NMR (125 MHz,  $\text{CDCl}_3$ ) spectra of the closed isomer of DASA-12.

## SUPPORTING INFORMATION

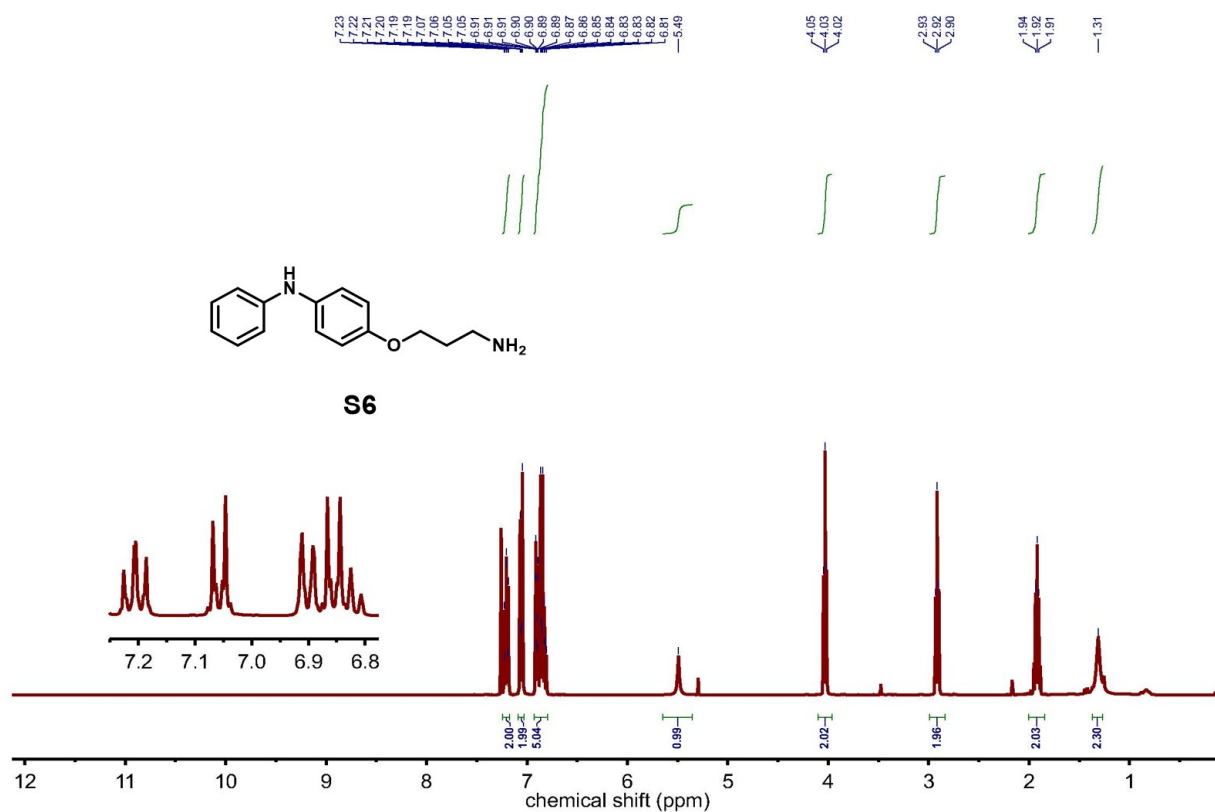Figure S97: <sup>1</sup>H NMR (400 MHz, CDCl<sub>3</sub>) spectra of S6.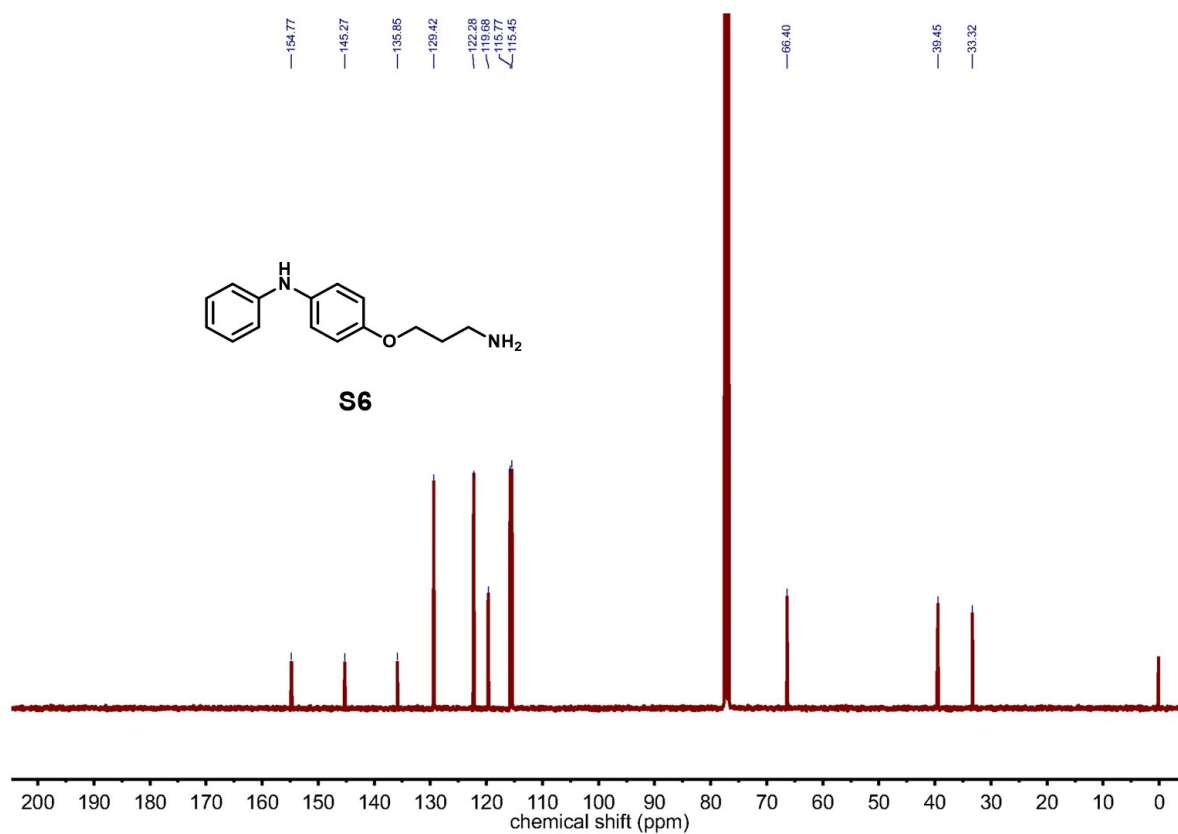Figure S98: <sup>13</sup>C NMR (100 MHz, CDCl<sub>3</sub>) spectra of S6.

## SUPPORTING INFORMATION

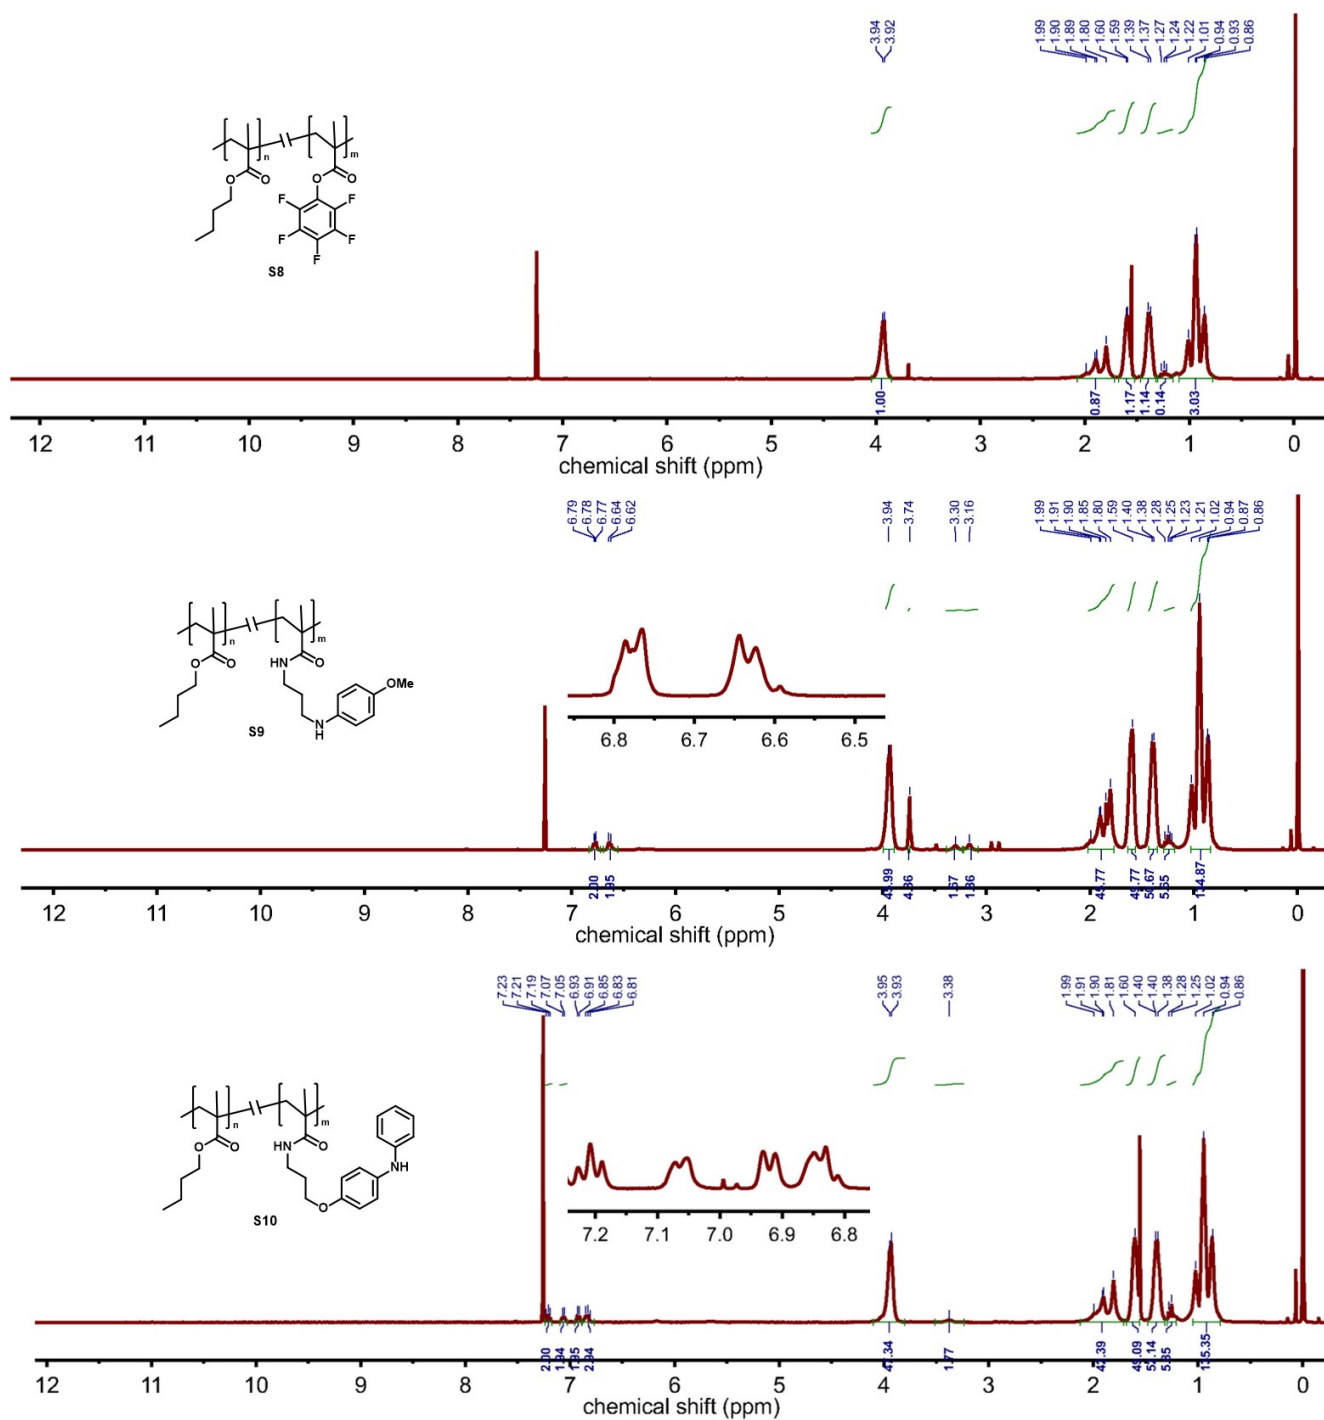

Figure S99: <sup>1</sup>H NMR (400 MHz, CDCl<sub>3</sub>) spectra of activated ester polymer **S8** and amine-modified polymers **S9** and **S10** (top to bottom).

## SUPPORTING INFORMATION

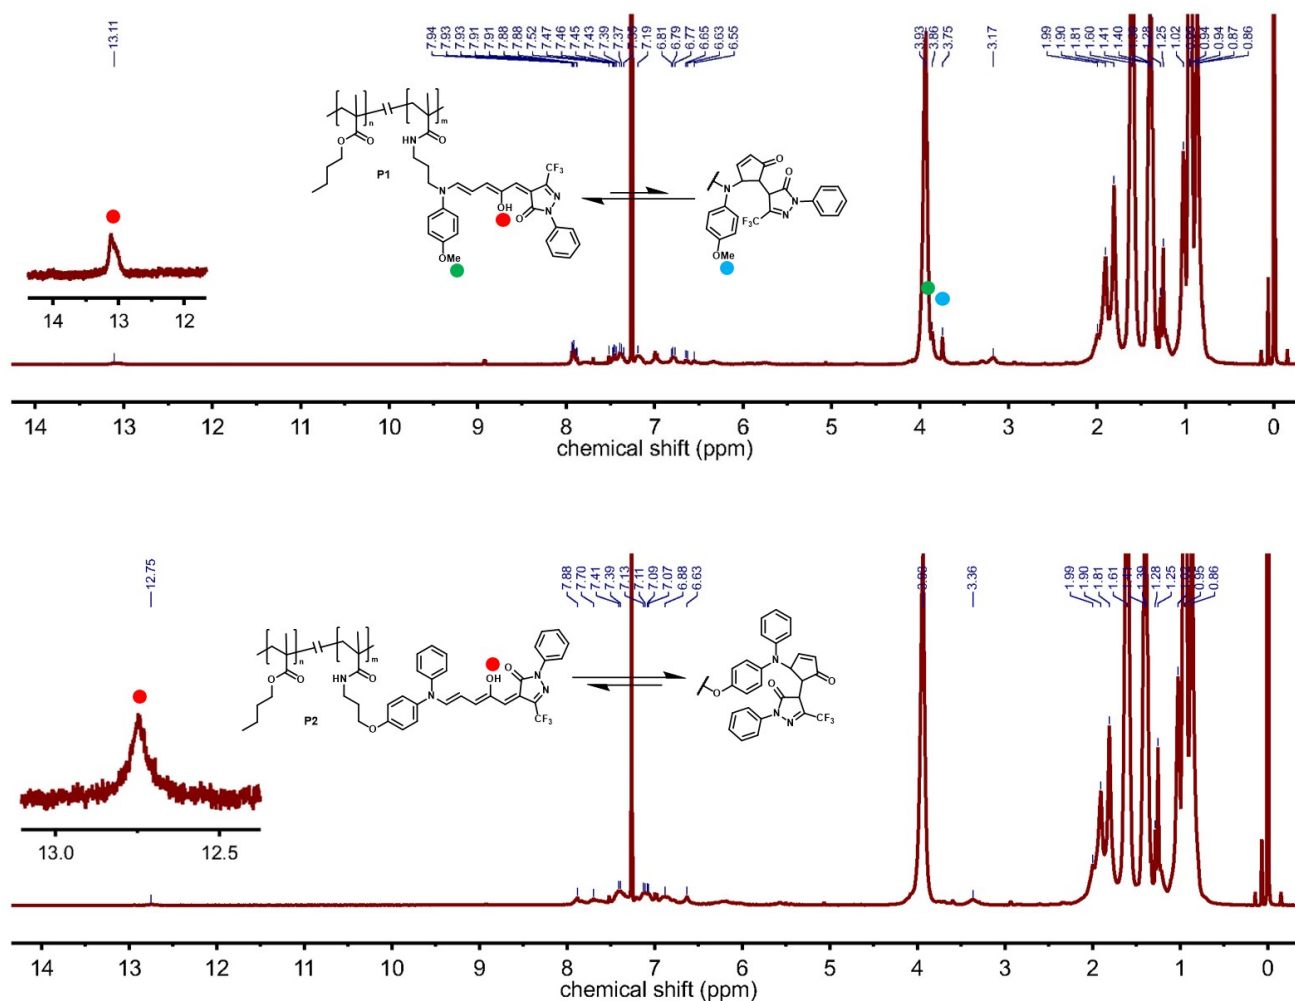

**Figure S100:** <sup>1</sup>H NMR (400 MHz, CDCl<sub>3</sub>) spectra of DASA-polymers P1 (top) and P2 (bottom). In solution the DASAs are in equilibrium between open and closed state resulting in a complex spectrum.<sup>[12,16]</sup> Characteristic peaks are marked by colored dots.



## SUPPORTING INFORMATION

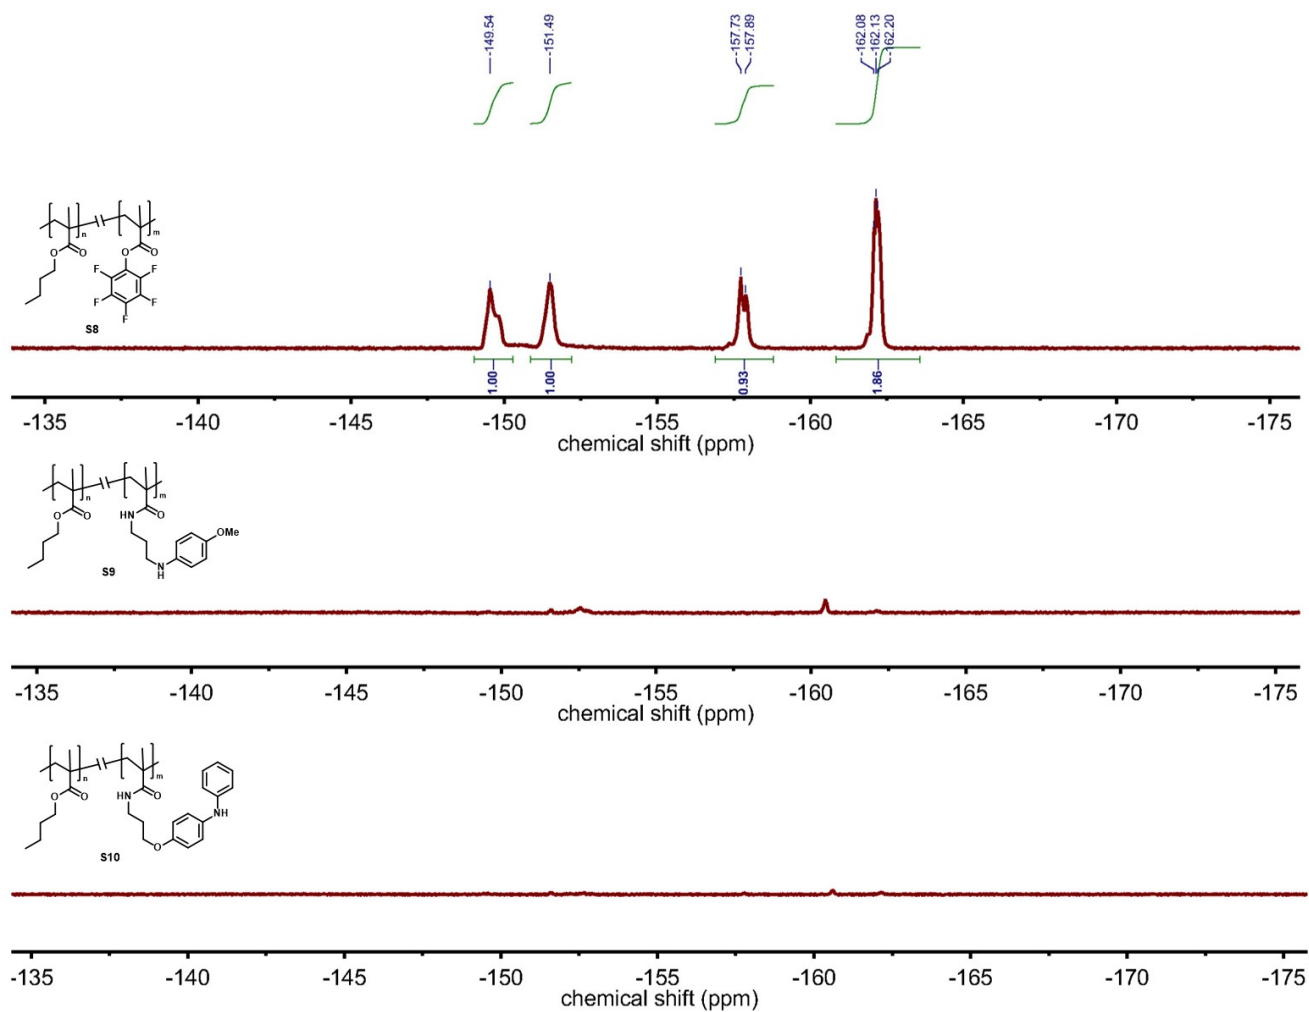

**Figure S101:**  $^{19}\text{F}$  NMR (376 MHz,  $\text{CDCl}_3$ ) of **S8**, **S9** and **S10** (top to bottom) showing complete disappearance of the fluorine signals after aminolysis of the pentafluorophenyl ester.

## SUPPORTING INFORMATION

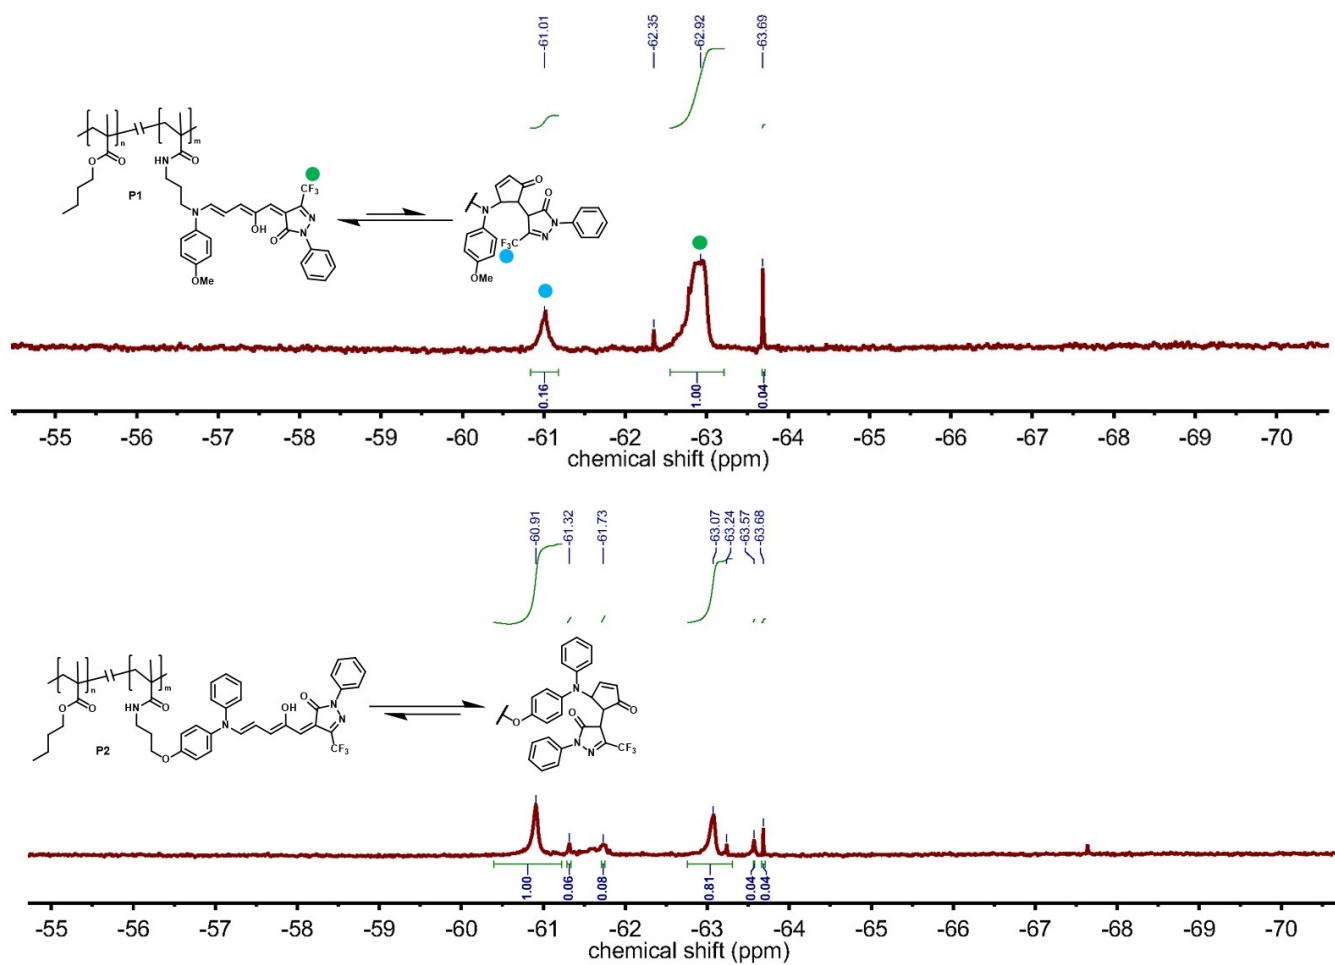

Figure S102:  $^{19}\text{F}$  NMR (376 MHz,  $\text{CDCl}_3$ ) spectra of DASA-polymers P1 (top) and P2 (bottom).

## SUPPORTING INFORMATION

## 11.2 IR Spectra

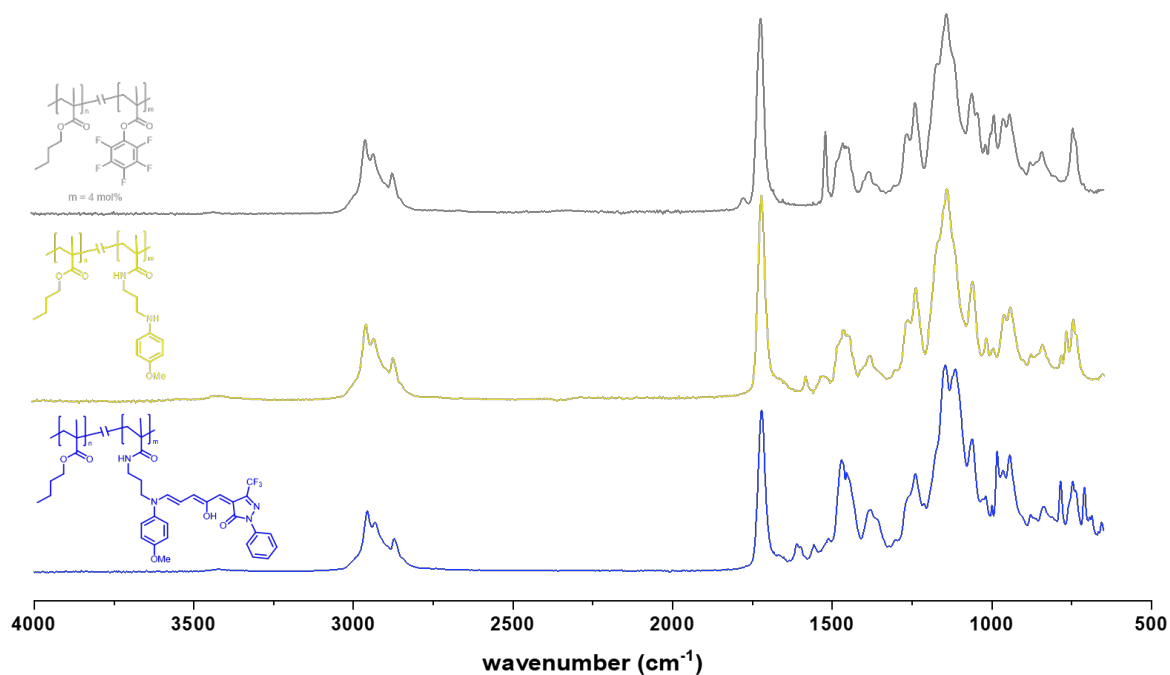

Figure S103: IR absorbance spectra of polymers S8 (top), S9 (middle) and P1 (bottom).

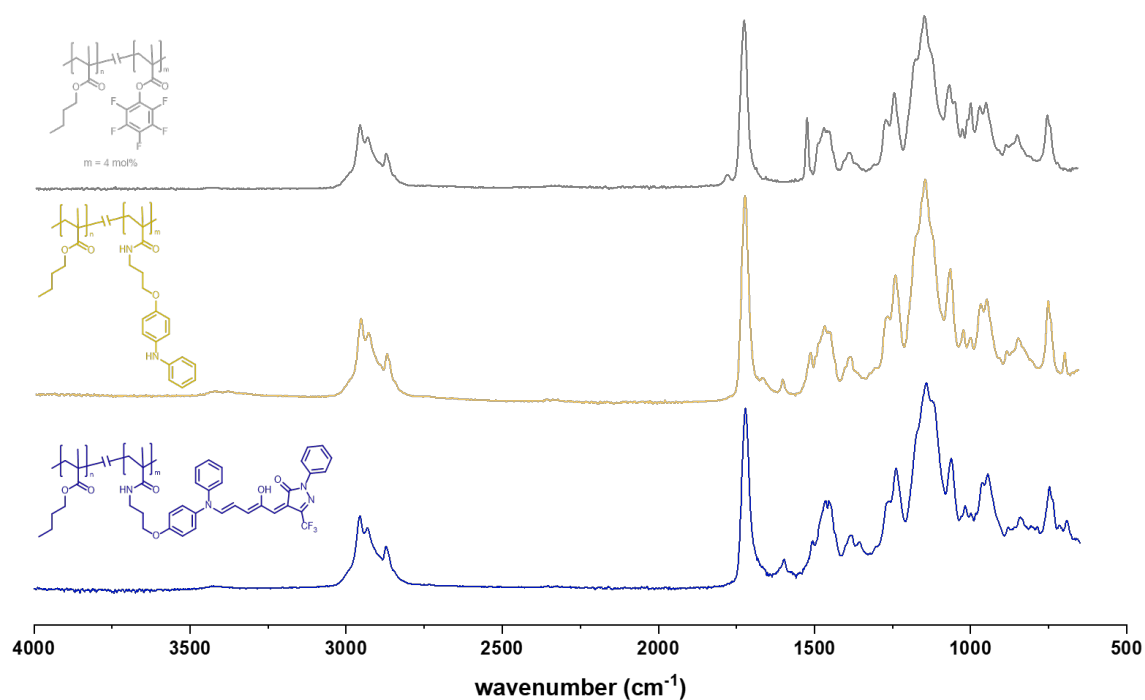

Figure S104: IR absorbance spectra of polymers S8 (top), S10 (middle) and P2 (bottom).

## 12. References

- [1] D. Yu, V. T. Thai, L. I. Palmer, G. K. Veits, J. E. Cook, J. Read de Alaniz, J. E. Hein, *J. Org. Chem.* **2013**, *78*, 12784–12789.
- [2] R. F. A. Gomes, J. A. S. Coelho, C. A. M. Afonso, *Chem. - A Eur. J.* **2018**, *24*, 9170–9186.
- [3] S. W. Li, R. A. Batey, *Chem. Commun.* **2007**, *8*, 3759–3761.
- [4] S. Helmy, S. Oh, F. A. Leibfarth, C. J. Hawker, J. Read de Alaniz, *J. Org. Chem.* **2014**, *79*, 11316–11329.
- [5] J. R. Hemmer, Z. A. Page, K. D. Clark, F. Stricker, N. D. Dolinski, C. J. Hawker, J. Read de Alaniz, *J. Am. Chem. Soc.* **2018**, *140*, 10425–10429.
- [6] H. Yin, M. Jin, W. Chen, C. Chen, L. Zheng, P. Wei, S. Han, *Tetrahedron Lett.* **2012**, *53*, 1265–1270.

## SUPPORTING INFORMATION

- [7] S. Lee, K. Y. Yi, S. K. Kim, J. Suh, N. J. Kim, S. E. Yoo, B. H. Lee, H. W. Seo, S. O. Kim, H. Lim, *Eur. J. Med. Chem.* **2003**, *38*, 459–471.
- [8] A. Mastitski, K. Kisseļjova, J. Järv, *Proc. Est. Acad. Sci.* **2014**, *63*, 438–443.
- [9] S. Helmy, F. A. Leibfarth, S. Oh, J. E. Poelma, C. J. Hawker, J. Read de Alaniz, *J. Am. Chem. Soc.* **2014**, *136*, 8169–8172.
- [10] M. M. Lerch, M. Medved, A. Lapini, A. D. Laurent, A. Iagatti, L. Bussotti, W. Szymański, W. J. Buma, P. Foggi, M. Di Donato, B. L. Feringa, *J. Phys. Chem. A* **2018**, *122*, 955–964.
- [11] J. R. Hemmer, S. O. Poelma, N. Treat, Z. A. Page, N. D. Dolinski, Y. J. Diaz, W. Tomlinson, K. D. Clark, J. P. Hooper, C. Hawker, J. Read de Alaniz, *J. Am. Chem. Soc.* **2016**, *138*, 13960–13966.
- [12] S. Ulrich, J. R. Hemmer, Z. A. Page, N. D. Dolinski, O. Rifaie-Graham, N. Bruns, C. J. Hawker, L. F. Boesel, J. Read de Alaniz, *ACS Macro Lett.* **2017**, *6*, 738–742.
- [13] C. Reichardt, *Chem. Rev.* **1994**, *94*, 2319–2358.
- [14] M. M. Lerch, M. Di Donato, A. D. Laurent, M. Medved', A. Iagatti, L. Bussotti, A. Lapini, W. J. Buma, P. Foggi, W. Szymański, B. L. Feringa, *Angew. Chemie - Int. Ed.* **2018**, *57*, 8063–8068.
- [15] L. Payne, J. D. Josephson, R. S. Murphy, B. D. Wagner, *Molecules* **2020**, *25*, 4928.
- [16] O. Rifaie-Graham, S. Ulrich, N. F. B. Galensowske, S. Balog, M. Chami, D. Rentsch, J. R. Hemmer, J. Read de Alaniz, L. F. Boesel, N. Bruns, *J. Am. Chem. Soc.* **2018**, *140*, 8027–8036.
